# Supplementary material for: MicroRNAome and Expression Profile of Developing Tooth Germ in Miniature Pigs
Source: PLoS One. 2012 Dec 18;7(12):e52256. doi: 10.1371/journal.pone.0052256 (PMC3525553; doi:10.1371/journal.pone.0052256)
Supplement: Table S1 — Porcine tooth germ miRNA candidates revealed by Solexa deep sequencing. (XLS) [file pone.0052256.s005.xls]

## Sheet: uni_miRs
Table 1 Porcine tooth germ miRNA candidates revealed by Solexa deep sequencing
miRNA ID	group	miR name	miR seq	miR length	mir name	mir Seq	mirLen	chr seqID	miR start	miR end	mir start	mir end
1	gp1a	miR-217-5p-12828	TACTGCATCAGGAACTGATTGGA	23	ssc-mir-217;hsa-mir-217;ptr-mir-217;bta-mir-217;ppy-mir-217;cfa-mir-217;mdo-mir-217;eca-mir-217;	ataattattacagagtttttgatgtcgcagaTACTGCATCAGGAACTGATTGGAtaagaattggtcaccatcagttcttaatgcattgccttcagcatctaaacaag	107	chr3	79172615	79172637	79172584	79172690
2	gp1a	miR-99a-5p-76	AACCCGTAGATCCGATCTTGTG	22	ssc-mir-99a;hsa-mir-99a;mmu-mir-99a;eca-mir-99a-2;ppy-mir-99a;rno-mir-99a;cfa-mir-99a-1;	ccattggcataAACCCGTAGATCCGATCTTGTGgtgaagtggaccgcacaagctcgcttctatgggtctgtgtcagtgtg	80	chr13	130664306	130664327	130664295	130664374
3	gp1a	miR-143-3p-444	TGAGATGAAGCACTGTAGCTC	21	ssc-mir-143;hsa-mir-143;mmu-mir-143;bta-mir-143;ppa-mir-143;mml-mir-143;rno-mir-143;eca-mir-143;mdo-mir-143;cfa-mir-143;	gtcccccagccggaggtgcagtgctgcatctctggtcagctgggagtcTGAGATGAAGCACTGTAGCTCgggaagggaga	80	chr2	136030800	136030820	136030752	136030831
4	gp1a	miR-378-3p-21764	CACTGGACTTGGAGTCAGAAGGC	23	ssc-mir-378;hsa-mir-378;mml-mir-378;ptr-mir-378;rno-mir-378;cfa-mir-378;	ccacccagggctcctgactccaggtcctgtgtgttgcctggaaatagcACTGGACTTGGAGTCAGAAGGCctgcgtggag	80	chr2	136265650	136265672	136265603	136265682
5	gp1a	miR-105-5p-39093	TCAAATGCTCAGACTCCTTGGTG	23	ssc-mir-105-2;ssc-mir-105-1;hsa-mir-105-2;hsa-mir-105-1;bta-mir-105b;cfa-mir-105b;eca-mir-105;	tgtgcatcgtggtcaaatgctcagactccttggtggctgcttatgcaCCACGGATGTTTGAGCATGTGCtatggtgtcta	80	chrX	121720271	121720293	121720259	121720338
6	gp1a	miR-99b-5p-47	CACCCGTAGAACCGACCTTGCG	22	ssc-mir-99b;ptr-mir-99b;cfa-mir-99b;	ggcaccCACCCGTAGAACCGACCTTGCGgggccttcgccgcacacaagctcgtgtctgtgggtccgtgtc	70	chr6	39533222	39533243	39533216	39533285
7	gp1a	miR-192-5p-6958	CTGACCTATGAATTGACAGCC	21	ssc-mir-192;hsa-mir-192;mmu-mir-192;ptr-mir-192;mml-mir-192;bta-mir-192;rno-mir-192;oan-mir-192;cfa-mir-192;eca-mir-192;	gcacagggctCTGACCTATGAATTGACAGCCagtgctctcatctcccctctggctgccaattccataggtcacaggtatg	80	chr2	5685422	5685442	5685412	5685491
8	gp1a	miR-15a-5p-4149	TAGCAGCACATAATGGTTTGT	21	ssc-mir-15a;hsa-mir-15a;mmu-mir-15a;mdo-mir-15a;cfa-mir-15a;eca-mir-15a;	ttggagtaaagTAGCAGCACATAATGGTTTGTggattttgaaaaggtgcaggccatattgtgctgcctcaaaaatacaa	79	chr11	17602989	17603009	17602978	17603056
9	gp1a	miR-181b-5p-24202	AACATTCATTGCTGTCGGTGGGTTGA	26	ssc-mir-181b-1;hsa-mir-181b-1;mmu-mir-181b-1;mml-mir-181b-1;ptr-mir-181b-1;ppy-mir-181b;bta-mir-181b-1;rno-mir-181b-1;mdo-mir-181b;cfa-mir-181b-1;	ggtcacaatcAACATTCATTGCTGTCGGTGGGTTgaactgtgtagacaagctcactgaacaatgaatgcaactgtggccc	80	chr10	22839235	22839260	22839191	22839270
10	gp1a	miR-1277-3p-15717	TACGTAGATATATATGTATTTT	22	ssc-mir-1277;hsa-mir-1277;	tagcctcccaaatatatatatatatgtacgtatgtgtatatgaatgtaTACGTAGATATATATGTATTTTtggtgggttt	80	chrX	97562467	97562488	97562457	97562536
11	gp1a	miR-1-3p-9331	TAGAATGTAAAGAAGTATGTAT	22	ssc-mir-1;hsa-mir-1-1;mmu-mir-1-1;bta-mir-1-1;eca-mir-1-2;mml-mir-1-1;ptr-mir-1-1;cfa-mir-1-1;	ccggttgacgtacctgcttgggggacatacttctttatgtgcccatatggacctgctaagctaTGGAATGTAAAGAAGTATGTATttcaggctgggaactctcaccgg	108	chr17	64096285	64096306	64096222	64096329
12	gp1a	miR-30e-3p-1263	CTTTCAGTCGGATGTTTACAGC	22	ssc-mir-30e;hsa-mir-30e;mmu-mir-30e;bta-mir-30e;ptr-mir-30e;mml-mir-30e;cfa-mir-30e;	tttgccacTGTAAACATCCTTGACTGGAAGCTgtgaggcgttcccaggagctttcagtcggatgtttacagcggcaggct	80	chr6	121824309	121824330	121824301	121824380
13	gp1a	miR-103-3p-14	AGCAGCATTGTACAGGGCTATGA	23	ssc-mir-103-1;hsa-mir-103-1;mmu-mir-103-1;bta-mir-103-1;mdo-mir-103-1;eca-mir-107a;cfa-mir-103-1;	cttactgccctcggcttctttacagtgctgccttgttgcatatggatcaAGCAGCATTGTACAGGGCTATGAaggcactgag	82	chr16	52667667	52667689	52667657	52667738
14	gp1a	miR-222-3p-270	AGCTACATCTGGCTACTGGGTCTC	24	ssc-mir-222;hsa-mir-222;mmu-mir-222;bta-mir-222;eca-mir-222;mml-mir-222;age-mir-222;cfa-mir-222;	tgccctcaatggctcagtagccagtgtagatcctgtcatttgtaatcagtAGCTACATCTGGCTACTGGGTCTCtgatgg	80	chrX	40478840	40478863	40478834	40478913
15	gp1a	miR-30a-3p-1140	CTTTCAGTCGGATGTTTGCAGC	22	ssc-mir-30a;hsa-mir-30a;bta-mir-30a;mdo-mir-30a;mml-mir-30a;cfa-mir-30a;	tccctgcgacagtgagcggcTGTAAACATCCTCGACTGGAAGCTgtgaggctgaagacgggctttcagtcggatgtttgcagccgccgactgcctcccgcatcagga	107	chr1	53849022	53849043	53848998	53849104
16	gp1a	miR-145-3p-11588	ATTCCTGGAAATACTGTTCTT	21	ssc-mir-145;hsa-mir-145;mmu-mir-145;rno-mir-145;mml-mir-145;cfa-mir-145;eca-mir-145;mdo-mir-145;	caccttgtcctcacgGTCCAGTTTTCCCAGGAATCCCTtagatgctgagatggggattcctggaaatactgttcttgaggtcatgg	86	chr2	136032196	136032216	136032141	136032226
17	gp1a	miR-98-3p-22500	TATACAACTTACTACTTTCCTT	22	ssc-mir-98;hsa-mir-98;mmu-mir-98;eca-mir-98;bta-mir-98;rno-mir-98;cfa-mir-98;age-mir-98;	gggTGAGGTAGTAAGTTGTATTGTTgtggggtagggattttaggccccaattagaagataactatacaacttactacttt	80	chrX	45719495	45719516	45719499	45719578
18	gp1a	miR-92b-3p-442	TATTGCACTCGTCCCGGCCTCC	22	ssc-mir-92b;hsa-mir-92b;mmu-mir-92b;mml-mir-92b;bta-mir-92b;ppy-mir-92b;rno-mir-92b;eca-mir-92b;cfa-mir-92b;	gcgggcgggagggacgggacgcggtgcagtgttgttctttcccctgccaaTATTGCACTCGTCCCGGCCTCCggcccccc	80	chr4	98703333	98703354	98703325	98703404
19	gp1a	miR-504-5p-623	AGACCCTGGTCTGCACTCTATC	22	ssc-mir-504;hsa-mir-504;mmu-mir-504;cfa-mir-504;bta-mir-504;mml-mir-504;ptr-mir-504;rno-mir-504;	gctgttgggAGACCCTGGTCTGCACTCTATCtgtatgcttactgaagggagcgcagggcagggtttcccacacagagggc	80	chrX	111416470	111416491	111416461	111416540
20	gp1a	miR-30b-3p-22935	CTGGGAGGTGGATGTTTACTTC	22	ssc-mir-30b;hsa-mir-30b;age-mir-30b;ggo-mir-30b;bta-mir-30b;rno-mir-30b;cfa-mir-30b;eca-mir-30b;	tttcagttcgTGTAAACATCCTACACTCAGCTgtaatacatggattggctgggaggtggatgtttacttcagctga	76	chr4	5733632	5733653	5733584	5733659
21	gp1a	miR-199a-3p-1	ACAGTAGTCTGCACATTGGTTA	22	ssc-mir-199b;hsa-mir-199b;mmu-mir-199b;ptr-mir-199b;bta-mir-199b;ppy-mir-199b;mdo-mir-199b;eca-mir-199b;cfa-mir-199-3;	ccgtctacccagtgtttagactatctgttcaggactcccaaattgtACAGTAGTCTGCACATTGGTTAggctgg	74	chr1	283325998	283326019	283325992	283326065
22	gp1a	miR-574-3p-554	CACGCTCATGCACACACCCACA	22	ssc-mir-574;hsa-mir-574;mmu-mir-574;cfa-mir-574;	tgggtgcgggcgtgtgagtgtgtgtgtgtgagtgtgtgtcgctccgggtcCACGCTCATGCACACACCCACAcgcccgca	80	chr8	25753425	25753446	25753375	25753454
23	gp1a	miR-340-5p-615	TTATAAAGCAATGAGACTGATT	22	ssc-mir-340;hsa-mir-340;mmu-mir-340;ptr-mir-340;bta-mir-340;ppy-mir-340;mml-mir-340;rno-mir-340;cfa-mir-340;eca-mir-340;	tacctggtgtgaTTATAAAGCAATGAGACTGATTgtcatatgtcgtttgtgggatccgtctcagttactttatagccata	80	chr2	67820624	67820645	67820612	67820691
24	gp1a	miR-7e-3p-28921	CTATACGGCCTCCTAGCTTTCC	22	ssc-let-7e;hsa-let-7e;mmu-let-7e;eca-let-7e;ptr-let-7e;cfa-let-7e;	gccccgggcTGAGGTAGGAGGTTGTATAGTTgaggaggacacccacggagatcactatacggcctcctagctttccccag	80	chr6	39533429	39533450	39533375	39533454
25	gp1a	miR-326-3p-20734	CCTCTGGGCCCTTCCTCCAGT	21	ssc-mir-326;hsa-mir-326;mmu-mir-326;bta-mir-326;eca-mir-326;ptr-mir-326;cfa-mir-326;	tctgtctgttgggctggaggcagggcctttgtgcaggcgggttgtgctcagatcgCCTCTGGGCCCTTCCTCCAGCccagaggcggattca	91	chr9	9132245	9132265	9132230	9132320
26	gp1a	miR-133a-5p-9623	AGCTGGTAAAATGGAACCAAAT	22	ssc-mir-133a;hsa-mir-133a-2;mmu-mir-133a-1;ptr-mir-133a-2;bta-mir-133a-1;cfa-mir-133c;mdo-mir-133a;rno-mir-133a;cfa-mir-133a;eca-mir-133a-2;eca-mir-133a;	cgggacccaaatgctttgctaaagctggtaaaatggaaccaaatcaactgttgaatggatTTGGTCCCCTTCAACCAGCTGTagctgcgcattgacagcgccg	103	chr17	64054002	64054023	64053943	64054045
27	gp1a	miR-206-3p-33411	TGGAATGTAAGGAAGT	16	ssc-mir-206;bta-mir-206;eca-mir-206-2;cfa-mir-206;	ttcccgaggccacatgcttctttatatccccatacggattacttgactaTGGAATGTAAGGAAGTGTGTGAtctcgttaa	80	chr7	53111440	53111455	53111391	53111470
28	gp1a	miR-365-5p-8303	AGGGACTTTCAGGGGCAGCTGTG	23	ssc-mir-365-2;hsa-mir-365-2;mmu-mir-365-2;bta-mir-365-2;mml-mir-365-2;ptr-mir-365-2;rno-mir-365;eca-mir-365;	aaaaatgagggactttcaggggcagctgtgttttctgactcagtcaTAATGCCCCTAAAAATCCTTATtgttcttgcagt	80	chr12	41107236	41107258	41107186	41107265
29	gp1a	miR-423-3p-236	AGCTCGGTCTGAGGCCCCTCAGT	23	ssc-mir-423;hsa-mir-423;mmu-mir-423;mml-mir-423;ptr-mir-423;ppy-mir-423;rno-mir-423;eca-mir-423;cfa-mir-423a;	aagttaggcTGAGGGGCAGAGAGCGAGACTTTtctattttccaaaagctcggtctgaggcccctcagtcttgcttcctac	80	chr12	44150545	44150567	44150500	44150579
30	gp1a	miR-181d-5p-4330	AACATTCATTGTTGTCGGTGGGTTG	25	ssc-mir-181d;mmu-mir-181d;bta-mir-181d;rno-mir-181d;cfa-mir-181d;	tcacaatcAACATTCATTGTTGTCGGTGGGTTgtgagacggaggccagacccaccgagggatgaatgtcactgtggctgg	80	chr2	56889508	56889532	56889500	56889579
31	gp1a	miR-100-5p-195	AACCCGTAGATCCGAACTTGTG	22	ssc-mir-100;mmu-mir-100;oan-mir-100;bta-mir-100;mdo-mir-100;rno-mir-100;cfa-mir-99a-2;eca-mir-100;	aggcctgttgccacaAACCCGTAGATCCGAACTTGTGctgatagtgcacacaagcttgtgtctataggtatgtgtctgtg	80	chr9	47702764	47702785	47702721	47702800
32	gp1a	miR-30c-5p-2750	TGTAAACATCCTACACTCTCAGCT	24	ssc-mir-30c;hsa-mir-30c-2;mmu-mir-30c-2;rno-mir-30c-2;bta-mir-30f;mml-mir-30c-2;cfa-mir-30c-2;eca-mir-30c-2;	gacagatacTGTAAACATCCTACACTCTCAGCTgtggaaagtaagaaagctgggagaaggctgtttactctctctgcctt	80	chr1	53819953	53819976	53819906	53819985
33	gp1a	miR-204-5p-5747	TTCCCTTTGTCATCCTATGCCT	22	ssc-mir-204;hsa-mir-204;mmu-mir-204;rno-mir-204;bta-mir-204;cfa-mir-204;	ggctacagtccttctcatgtgactcgtggacTTCCCTTTGTCATCCTATGCCTgagaatatatgaaggaggctgggaaggcaaagggacgttcaattgtcatcactggc	109	chr1	234511681	234511702	234511625	234511733
34	gp1a	miR-135a-3p-15122	ATATAGGGATTGGAGCCGTGGC	22	ssc-mir-135-1;hsa-mir-135a-1;mmu-mir-135a-1;ppa-mir-135-1;ptr-mir-135a-1;bta-mir-135a-1;cfa-mir-135a-1;eca-mir-135a;	aggcctcgctgttctcTATGGCTTTTTATTCCTATGTGAttctactgctcattcatatagggattggagccgtggcgcacggcggggaca	90	chr13	28964520	28964541	28964466	28964555
35	gp1a	miR-23b-5p-427	GGGTTCCTGGCATGCTGATTT	21	ssc-mir-23b;hsa-mir-23b;mmu-mir-23b;eca-mir-23b;mdo-mir-23b;bta-mir-23b;cfa-mir-23b;	ctctggctgcttgggttcctggcatgctgatttgtgacttaagattaaaATCACATTGCCAGGGATTACCACGcagccac	80	chr10	26149057	26149077	26149010	26149089
36	gp1a	miR-106a-5p-29928	AAAAGTGCTTACAGTGCAGGTAT	23	ssc-mir-106a;hsa-mir-106a;age-mir-106a;eca-mir-106a;rno-mir-17-2;cfa-mir-106a;	ccttggccgtgtAAAAGTGCTTACAGTGCAGGTAGctttttgagatctactgcaatgcaagcacttcttacattaccatgg	81	chrX	108213125	108213147	108213079	108213159
37	gp1a	miR-130a-3p-263	CAGTGCAATGTTAAAAGGGCAT	22	ssc-mir-130a;hsa-mir-130a;ptr-mir-130a;mml-mir-130a;mdo-mir-130a;eca-mir-130a;cfa-mir-130a;	cgggccggagctcttttcacattgtgctactgtctgcacctatcactagCAGTGCAATGTTAAAAGGGCATtggccacg	79	chr2	11301862	11301883	11301854	11301932
38	gp1a	miR-676-5p-36205	CTCTTCAATCTCAGGACTCGCA	22	ssc-mir-676;cfa-mir-676;	aacgcgtgactcttcaatctcaggactcgcataattagcagaatgCCGTCCTAAGGTTGTTGAGTTctgcgtttctgggc	80	chrX	55113083	55113104	55113034	55113113
39	gp1a	miR-221-3p-121	AGCTACATTGTCTGCTGGGTTTC	23	ssc-mir-221;hsa-mir-221;mmu-mir-221;eca-mir-221;bta-mir-221;ptr-mir-221;oan-mir-221;mdo-mir-221;cfa-mir-221;	tgaacctggcatacaatgtagatttctgtgtttgttgggcaacAGCTACATTGTCTGCTGGGTTTCaggc	70	chrX	40478098	40478120	40478094	40478163
40	gp1a	miR-345-3p-9705	CCCTGAACTAGGGGTCTGGAG	21	ssc-mir-345;hsa-mir-345;bta-mir-345;eca-mir-345;ppy-mir-345;ptr-mir-345;cfa-mir-345;	aacccaggtctgctgactcctagtccagtgcttgtgatggctggtgggcCCTGAACTAGGGGTCTGGAGGcctgggtttg	80	chr7	130435971	130435991	130435923	130436002
41	gp1a	miR-27b-5p-987	AGAGCTTAGCTGATTGGTGAACA	23	ssc-mir-27b;hsa-mir-27b;mmu-mir-27b;bta-mir-27b;ptr-mir-27b;mdo-mir-27b;eca-mir-27b;cfa-mir-27b;	acgaggtgcagagcttagctgattggtgaacagtgactggtttccgctttgTTCACAGTGGCTAAGTTCTGCacctgaag	80	chr10	26148824	26148846	26148776	26148855
42	gp1a	miR-455-3p-1559	GCAGTCCATGGGCATATACAC	21	ssc-mir-455;hsa-mir-455;mmu-mir-455;ptr-mir-455;bta-mir-455;mdo-mir-455;rno-mir-455;cfa-mir-455;	tggcgtgagggtatgtgcctttggactacatcgtggaagccagcaccatGCAGTCCATGGGCATATACACttgcctcaag	80	chr1	267848356	267848376	267848307	267848386
43	gp1a	miR-676-3p-2414	CCGTCCTAAGGTTGTTGAGTT	21	ssc-mir-676;cfa-mir-676;	aacgcgtgactcttcaatctcaggactcgcataattagcagaatgCCGTCCTAAGGTTGTTGAGTTctgcgtttctgggc	80	chrX	55113048	55113068	55113034	55113113
44	gp1a	miR-100-3p-24550	CAAGCTTGTGTCTATAGGTATG	22	ssc-mir-100;mmu-mir-100;oan-mir-100;bta-mir-100;mdo-mir-100;rno-mir-100;cfa-mir-99a-2;eca-mir-100;	aggcctgttgccacaAACCCGTAGATCCGAACTTGTGctgatagtgcacacaagcttgtgtctataggtatgtgtctgtg	80	chr9	47702729	47702750	47702721	47702800
45	gp1a	miR-130a-5p-10408	GCTCTTTTCACATTGTGCTACT	22	ssc-mir-130a;hsa-mir-130a;ptr-mir-130a;mml-mir-130a;mdo-mir-130a;eca-mir-130a;cfa-mir-130a;	cgggccggagctcttttcacattgtgctactgtctgcacctatcactagCAGTGCAATGTTAAAAGGGCATtggccacg	79	chr2	11301902	11301923	11301854	11301932
46	gp1a	miR-425-5p-1528	AATGACACGATCACTCCCGTTGA	23	ssc-mir-425;hsa-mir-425;mmu-mir-425;bta-mir-425;ptr-mir-425;mml-mir-425;rno-mir-425;mdo-mir-425;cfa-mir-425;	aagtgctttggAATGACACGATCACTCCCGTTGAgtgggcacccaagtagccatcgggaatgtcgtgtccgcccagtgct	80	chr13	26605197	26605219	26605151	26605230
47	gp1a	miR-107-3p-33	AGCAGCATTGTACAGGGCTAT	21	ssc-mir-107;hsa-mir-107;mmu-mir-107;rno-mir-107;oan-mir-107;mdo-mir-107;cfa-mir-107;	ttctctctgctttcagcttctttacagtgttgccttgtggcatggagttcaAGCAGCATTGTACAGGGCTATcaaagcacagagagc	87	chr14	106321717	106321737	106321702	106321788
48	gp1a	miR-342-3p-3575	TCTCACACAGAAATCGCACCCGTC	24	ssc-mir-342;cfa-mir-342;	aaggtgagggtgctatctgtgactgagggacatggcgcatagaactgTCTCACACAGAAATCGCACCCGTCaccttggcc	80	chr7	130281638	130281661	130281629	130281708
49	gp1a	miR-363-3p-495	AATTGCACGGTATCCATCTGTA	22	ssc-mir-363;hsa-mir-363;oan-mir-363;rno-mir-363;mml-mir-363;eca-mir-363;bta-mir-363;mdo-mir-363;cfa-mir-363;	gctgttgtcgggtggatcacgatgcaattttgattagtatcataggagaaaAATTGCACGGTATCCATCTGTAaaccgca	80	chrX	108178328	108178349	108178321	108178400
50	gp1a	miR-708-5p-10346	GGTGAATGACTTGCACATGAACG	23	ssc-mir-708;hsa-mir-708;mmu-mir-708;bta-mir-708;eca-mir-708;ptr-mir-708;rno-mir-708;cfa-mir-708;	ccctcAAGGAGCTTACAATCTAGCTGGGGgtgaatgacttgcacatgaacgcaactagactgtgagcttctagagggcag	80	chr9	13711376	13711398	13711347	13711426
51	gp1a	miR-195-5p-6765	TAGCAGCACAGAAATATTGGCA	22	ssc-mir-195;hsa-mir-195;eca-mir-195;bta-mir-195;ptr-mir-195;	cagcccccctggctcTAGCAGCACAGAAATATTGGCAccgggcggagagtctgccagtattggctgtgctgccccaggca	80	chr12	49575899	49575920	49575884	49575963
52	gp1a	miR-205-3p-2188	GATTTCAGTGGAGTGAAGCTCA	22	ssc-mir-205;mmu-mir-205;eca-mir-205;cfa-mir-205;mdo-mir-205a;	ctcttgTCCTTCATTCCACCGGAGTCTGTctcatacccaaccagatttcagtggagtgaagctcaggag	69	chr9	126011592	126011613	126011588	126011656
53	gp1a	miR-1307-3p-821	ACTCGGCGTGGCGTCGGTCGTGG	23	ssc-mir-1307;hsa-mir-1307;cfa-mir-1307;	ctaccaatctcgaccggacctcgaccggctcgtctatgttgccaatcgACTCGGCGTGGCGTCGGTCGTGGtagataggc	80	chr14	119440212	119440234	119440203	119440282
54	gp1a	miR-92b-5p-11484	AGGGACGGGACGCGGTGCAGTGTT	24	ssc-mir-92b;hsa-mir-92b;mmu-mir-92b;mml-mir-92b;bta-mir-92b;ppy-mir-92b;rno-mir-92b;eca-mir-92b;cfa-mir-92b;	gcgggcgggagggacgggacgcggtgcagtgttgttctttcccctgccaaTATTGCACTCGTCCCGGCCTCCggcccccc	80	chr4	98703372	98703395	98703325	98703404
55	gp1a	miR-129-5p-16749	CTTTTTGCGGTCTGGGCTTGC	21	ssc-mir-129;hsa-mir-129-2;mmu-mir-129-2;mml-mir-129-2;bta-mir-129-2;rno-mir-129-2;ptr-mir-129-2;eca-mir-129b;cfa-mir-129-2;	cttcgtgaatCTTTTTGCGGTCTGGGCTTGCtgtacataactcaatagccggaagcccttaccccaaaaagcattcgcgg	80	chr2	17100373	17100393	17100324	17100403
56	gp1a	miR-24-5p-12205	GTGCCTACTGAGCTGAAACACA	22	ssc-mir-24-1;hsa-mir-24-2;bta-mir-24-2;mml-mir-24-2;eca-mir-24;cfa-mir-24-2;mdo-mir-24-2;	ctctgcctcccgtgcctactgagctgaaacacagttgatttgtgcagacTGGCTCAGTTCAGCAGGAACAGg	72	chr2	56860860	56860881	56860821	56860892
57	gp1a	miR-708-3p-18309	AACTAGACTGTGAGCTTCTAGA	22	ssc-mir-708;hsa-mir-708;mmu-mir-708;bta-mir-708;eca-mir-708;ptr-mir-708;rno-mir-708;cfa-mir-708;	ccctcAAGGAGCTTACAATCTAGCTGGGGgtgaatgacttgcacatgaacgcaactagactgtgagcttctagagggcag	80	chr9	13711353	13711374	13711347	13711426
58	gp1a	miR-214-3p-314	ACAGCAGGCACAGACAGGCAGT	22	ssc-mir-214;hsa-mir-214;oan-mir-214;mdo-mir-214;rno-mir-214;eca-mir-214;	ggcctggctggacggagttgtcatgtgtctgcctgtctacacttgctgtgcagaacatccgctcacctgtACAGCAGGCACAGACAGGCAGTcacatgacaacccagcct	110	chr9	107639171	107639192	107639153	107639262
59	gp1a	miR-324-5p-8964	CGCATCCCCTAGGGCATTGGTGT	23	ssc-mir-324;hsa-mir-324;mmu-mir-324;bta-mir-324;ptr-mir-324;rno-mir-324;cfa-mir-324;	ctatgcctccccgcatcccctagggcattggtgtgaagctggagacccACTGCCCCAGGTGCTGCTGGGggttgtagtct	80	chr12	49872818	49872840	49872807	49872886
60	gp1a	miR-122-5p-1298	TGGAGTGTGACAATGGTGTTTG	22	ssc-mir-122;hsa-mir-122;mmu-mir-122;mml-mir-122a;ptr-mir-122;rno-mir-122;mdo-mir-122;eca-mir-122;cfa-mir-122;	ccttagcagagctgTGGAGTGTGACAATGGTGTTTGtgtccaaactatcaaacgccattatcacactaaatagctactgttaggc	85	chr1	169284260	169284281	169284211	169284295
61	gp1a	miR-99b-3p-543	CAAGCTCGTGTCTGTGGGTCCGT	23	ssc-mir-99b;ptr-mir-99b;cfa-mir-99b;	ggcaccCACCCGTAGAACCGACCTTGCGgggccttcgccgcacacaagctcgtgtctgtgggtccgtgtc	70	chr6	39533260	39533282	39533216	39533285
62	gp1a	miR-136-3p-5100	CATCATCGTCTCAAATGAGTCT	22	ssc-mir-136;hsa-mir-136;mmu-mir-136;oar-mir-136;mml-mir-136;bta-mir-136;rno-mir-136;eca-mir-136;cfa-mir-136;	tgagccctcggaggactccatttgttttgatgatggattcttacgctcCATCATCGTCTCAAATGAGTCTtcagagggttct	82	chr7	133834396	133834417	133834348	133834429
63	gp1a	miR-320-3p-5	AAAAGCTGGGTTGAGAGGGCGA	22	ssc-mir-320;hsa-mir-320a;hsa-mir-320e;mmu-mir-320;bta-mir-320-1;mml-mir-320;ptr-mir-320a;cfa-mir-320;ptr-mir-320d-2;ptr-mir-320d-3;	gctcccctccgccttctcttcccggttcttcccggagtcgggAAAAGCTGGGTTGAGAGGGCGAaaaaggaagaggggac	80	chr14	6473907	6473928	6473891	6473970
64	gp1a	miR-145-5p-234	GTCCAGTTTTCCCAGGAATCCCT	23	ssc-mir-145;hsa-mir-145;mmu-mir-145;rno-mir-145;mml-mir-145;cfa-mir-145;eca-mir-145;mdo-mir-145;	caccttgtcctcacgGTCCAGTTTTCCCAGGAATCCCTtagatgctgagatggggattcctggaaatactgttcttgaggtcatgg	86	chr2	136032156	136032178	136032141	136032226
65	gp1a	miR-181a-3p-3133	ACCATCGACCGTTGATTGTACC	22	ssc-mir-181a-1;hsa-mir-181a-1;mmu-mir-181a-1;ggo-mir-181a-1;bta-mir-181a-1;rno-mir-181a-1;mdo-mir-181a;cfa-mir-181a-1;	gagtttagaggttgcttcagtgAACATTCAACGCTGTCGGTGAGTTtggaattcaaatcaaaaccatcgaccgttgattgtaccctatggccaaccatcagctc	104	chr10	22839372	22839393	22839352	22839455
66	gp1a	miR-769-3p-18436	CTGGGATCTCTGGGGTCTTGGTT	23	ssc-mir-769;	tgcgctctgaccTGAGACCTCTGGGTTCTGAGCTgtgatgttgcttccaagctgggatctctggggtcttggttcagggt	80	chr6	36259110	36259132	36259104	36259183
67	gp1a	miR-99a-3p-2459	CAAGCTCGCTTCTATGGGTCTGT	23	ssc-mir-99a;hsa-mir-99a;mmu-mir-99a;eca-mir-99a-2;ppy-mir-99a;rno-mir-99a;cfa-mir-99a-1;	ccattggcataAACCCGTAGATCCGATCTTGTGgtgaagtggaccgcacaagctcgcttctatgggtctgtgtcagtgtg	80	chr13	130664343	130664365	130664295	130664374
68	gp1a	miR-21-5p-44	TAGCTTATCAGACTGATGTTGAC	23	ssc-mir-21;hsa-mir-21;mmu-mir-21;bta-mir-21;mdo-mir-21;cfa-mir-21;	tgtaccaccttgtcgggTAGCTTATCAGACTGATGTTGACtgttgaatctcatggcaacagcagtcgatgggctgtctgacattttggtatc	92	chr12	34201582	34201604	34201565	34201656
69	gp1a	miR-505-3p-3920	GTCAACACTTGCTGGTTTCCTCT	23	ssc-mir-505;hsa-mir-505;mmu-mir-505;bta-mir-505;ptr-mir-505;cfa-mir-505;rno-mir-505;	gcactcagtggGGGAGCCAGGAAGTATTGATGTTtctgccaggttagcgtcaacacttgctggtttcctctctggagcat	80	chrX	112590860	112590882	112590812	112590891
70	gp1a	miR-210-3p-2333	CTGTGCGTGTGACAGCGGCTGA	22	ssc-mir-210;hsa-mir-210;mmu-mir-210;bta-mir-210;mml-mir-210;ptr-mir-210;cfa-mir-210;	gcgcagggcagccactgcccaccgcacactgcgctgctccggacccaCTGTGCGTGTGACAGCGGCTGAtctgtcc	76	chr2	331353	331374	331306	331381
71	gp1a	miR-139-5p-5165	TCTACAGTGCACGTGTCTCCAGT	23	ssc-mir-139;hsa-mir-139;ptr-mir-139;bta-mir-139;eca-mir-139;cfa-mir-139;	gtgtatTCTACAGTGCACGTGTCTCCAGTgtggctcggaggctggagacgcggccctgttggagtaac	68	chr9	6808398	6808420	6808359	6808426
72	gp1a	miR-186-5p-141	CAAAGAATTCTCCTTTTGGGCTT	23	ssc-mir-186;hsa-mir-186;mmu-mir-186;bta-mir-186;rno-mir-186;mml-mir-186;eca-mir-186;cfa-mir-186;mdo-mir-186;	tgcttataactttcCAAAGAATTCTCCTTTTGGGCTTtatgattttattttaagcccaaaggtgaattttttgggaagtttg	82	chr6	99703531	99703553	99703517	99703598
73	gp1a	miR-92a-5p-52622	AGGTTGGGATCGGTTGCAATGCTTT	25	ssc-mir-92a-1;hsa-mir-92a-1;mmu-mir-92a-1;rno-mir-92a-1;mdo-mir-92;eca-mir-92a;cfa-mir-92a-1;	ctttctacacaggttgggatcggttgcaatgctgtgtttctgtatggTATTGCACTTGTCCCGGCCTGTTGagtttggtg	80	chr11	60973170	60973194	60973160	60973239
74	gp1a	miR-181c-5p-1684	AACATTCAACCTGTCGGTGAGTTT	24	ssc-mir-181c;hsa-mir-181c;mmu-mir-181c;rno-mir-181c;bta-mir-181c;ppy-mir-181c;mml-mir-181c;cfa-mir-181c;mdo-mir-181c;	caagggtttgggggAACATTCAACCTGTCGGTGAGTTTgggcagctcaggcaaaccatcgaccgttgagtggaccccgaggcctgga	87	chr2	56889330	56889353	56889316	56889402
75	gp1a	miR-136-5p-6973	ACTCCATTTGTTTTGATGATGGA	23	ssc-mir-136;hsa-mir-136;mmu-mir-136;oar-mir-136;mml-mir-136;bta-mir-136;rno-mir-136;eca-mir-136;cfa-mir-136;	tgagccctcggaggactccatttgttttgatgatggattcttacgctcCATCATCGTCTCAAATGAGTCTtcagagggttct	82	chr7	133834362	133834384	133834348	133834429
76	gp1a	miR-29a-3p-669	TAGCACCATCTGAAATCGGTTA	22	ssc-mir-29a;hsa-mir-29a;mmu-mir-29a;eca-mir-29a;cfa-mir-29a;mdo-mir-29a;	ccccttagaggatgactgatttcttttggtgttcagagtcaatataattttcTAGCACCATCTGAAATCGGTTAtaatgattgggg	86	chr18	16054804	16054825	16054752	16054837
77	gp1a	miR-216a-5p-54378	TAATCTCAGCTGGCAACTGTGAG	23	ssc-mir-216;hsa-mir-216a;mmu-mir-216a;ppy-mir-216;cfa-mir-216a;bta-mir-216a;mml-mir-216a;mdo-mir-216;eca-mir-216a;	gatggctgtgagttggctTAATCTCAGCTGGCAACTGTGAGatgttcatacaatcccccacagtggtctctgggattatgctaaacagagcaatttccttgccct	105	chr3	79165870	79165892	79165852	79165956
78	gp1a	miR-345-5p-26266	GCTGACTCCTAGTCCAGTGCTT	22	ssc-mir-345;hsa-mir-345;bta-mir-345;eca-mir-345;ppy-mir-345;ptr-mir-345;cfa-mir-345;	aacccaggtctgctgactcctagtccagtgcttgtgatggctggtgggcCCTGAACTAGGGGTCTGGAGGcctgggtttg	80	chr7	130435934	130435955	130435923	130436002
79	gp1a	miR-148a-3p-224	TCAGTGCACTACAGAACTTTGT	22	ssc-mir-148a;hsa-mir-148a;mmu-mir-148a;oan-mir-148;ptr-mir-148a;mdo-mir-148;cfa-mir-148a;	gaggcaaagttctgagacactccgactctgaatatgatagaagTCAGTGCACTACAGAACTTTGTctc	68	chr18	45214551	45214572	45214548	45214615
80	gp1a	miR-105-5p-32318	AAATGCTCAGACTCCTGTGGTG	22	ssc-mir-105-1;ssc-mir-105-2;hsa-mir-105-1;hsa-mir-105-2;eca-mir-105;bta-mir-105b;cfa-mir-105b;	tgtgcatcgtagtcaaatgctcagactcctgtggtggctgctcatgcaCCACGGATGTTTGAGCATGTGCtacggtgtcta	81	chrX	121722387	121722408	121722373	121722453
81	gp1a	miR-210-5p-32608	AGCCACTGCCCACCGCACACTG	22	ssc-mir-210;hsa-mir-210;mmu-mir-210;bta-mir-210;mml-mir-210;ptr-mir-210;cfa-mir-210;	gcgcagggcagccactgcccaccgcacactgcgctgctccggacccaCTGTGCGTGTGACAGCGGCTGAtctgtcc	76	chr2	331315	331336	331306	331381
82	gp1a	miR-16-5p-29943	TAGCAGCACGTAAATATTGGCAT	23	ssc-mir-16-2;hsa-mir-16-1;mmu-mir-16-1;lla-mir-16;mdo-mir-16;cfa-mir-16-1;eca-mir-16-2;	cagtgcctTAGCAGCACGTAAATATTGGCGTTaagattctaaaattatctccagtattaactgtgctgctgaagtaagg	79	chr11	17603129	17603151	17603121	17603199
83	gp1a	miR-181a-5p-39048	AACATTCAACGCTGTC	16	ssc-mir-181a-1;hsa-mir-181a-1;mmu-mir-181a-1;ggo-mir-181a-1;bta-mir-181a-1;rno-mir-181a-1;mdo-mir-181a;cfa-mir-181a-1;	gagtttagaggttgcttcagtgAACATTCAACGCTGTCGGTGAGTTtggaattcaaatcaaaaccatcgaccgttgattgtaccctatggccaaccatcagctc	104	chr10	22839418	22839433	22839352	22839455
84	gp1a	miR-7c-5p-4	TGAGGTAGTAGGTTGTATGGTT	22	ssc-let-7c;hsa-let-7c;mmu-let-7c-1;ptr-let-7c;eca-let-7c;cfa-let-7c;	tgtgtgcatccgggtTGAGGTAGTAGGTTGTATGGTTtagagttacaccgtgggagttaactgtacaaccttctagctttccttggagcacact	94	chr13	130665036	130665057	130665021	130665114
85	gp1a	miR-23a-3p-217	ATCACATTGCCAGGGATTTCCA	22	ssc-mir-23a;hsa-mir-23a;mmu-mir-23a;bta-mir-23a;age-mir-23a;eca-mir-23a;lca-mir-23a;rno-mir-23a;cfa-mir-23a;	cggctggggttcctggggatgggatttgctgcctgtcacaaATCACATTGCCAGGGATTTCCAatcgacc	70	chr2	56861166	56861187	56861159	56861228
86	gp1a	miR-148a-5p-12537	AAAGTTCTGAGACACTCCGACT	22	ssc-mir-148a;hsa-mir-148a;mmu-mir-148a;oan-mir-148;ptr-mir-148a;mdo-mir-148;cfa-mir-148a;	gaggcaaagttctgagacactccgactctgaatatgatagaagTCAGTGCACTACAGAACTTTGTctc	68	chr18	45214589	45214610	45214548	45214615
87	gp1a	miR-22-5p-6426	AGTTCTTCAGTGGCAAGCTTTA	22	ssc-mir-22;hsa-mir-22;mmu-mir-22;rno-mir-22;sla-mir-22;cfa-mir-22;	gagccgcagtagttcttcagtggcaagctttatgtcctgacccagctaAAGCTGCCAGTTGAAGAACTGTtgccctctgc	80	chr12	45319053	45319074	45319043	45319122
88	gp1a	miR-21-3p-58304	AACAGCAGTCGATGGGCTGTCT	22	ssc-mir-21;hsa-mir-21;mmu-mir-21;bta-mir-21;mdo-mir-21;cfa-mir-21;	tgtaccaccttgtcgggTAGCTTATCAGACTGATGTTGACtgttgaatctcatggcaacagcagtcgatgggctgtctgacattttggtatc	92	chr12	34201621	34201642	34201565	34201656
89	gp1a	miR-10a-5p-40349	TACCCTGTAGATCCGAATTTGTGA	24	ssc-mir-10a;hsa-mir-10a;mmu-mir-10a;oan-mir-10a;age-mir-10a;mml-mir-10a;ptr-mir-10a;bta-mir-10a;eca-mir-10a;ppa-mir-10a;ppy-mir-10a;mdo-mir-10a;cfa-mir-10;	tctgtataTACCCTGTAGATCCGAATTTGTGTaaggaattttgtggtcacaaattcgtatctaggggaatatgtagttga	80	chr12	22389472	22389495	22389424	22389503
90	gp1a	miR-139-3p-9531	GGAGACGCGGCCCTGTTGGAGT	22	ssc-mir-139;hsa-mir-139;ptr-mir-139;bta-mir-139;eca-mir-139;cfa-mir-139;	gtgtatTCTACAGTGCACGTGTCTCCAGTgtggctcggaggctggagacgcggccctgttggagtaac	68	chr9	6808362	6808383	6808359	6808426
91	gp1a	miR-505-5p-1305	GGGAGCCAGGAAGTATTGATGTT	23	ssc-mir-505;hsa-mir-505;mmu-mir-505;bta-mir-505;ptr-mir-505;cfa-mir-505;rno-mir-505;	gcactcagtggGGGAGCCAGGAAGTATTGATGTTtctgccaggttagcgtcaacacttgctggtttcctctctggagcat	80	chrX	112590823	112590845	112590812	112590891
92	gp1a	miR-135a-3p-8771	ATGTAGGGATGGAAGCCATGAA	22	ssc-mir-135-2;mmu-mir-135a-2;oan-mir-135a;mdo-mir-135a;lla-mir-135-2;cfa-mir-135a-2;	agataaattcactctagtgcttTATGGCTTTTTATTCCTATGTGAtagtaataaagtctcatgtagggatggaagccatgaaatacattgtgaaaaatca	100	chr5	81615653	81615674	81615635	81615734
93	gp1a	miR-23a-5p-7460	GGGGTTCCTGGGGATGGGATTT	22	ssc-mir-23a;hsa-mir-23a;mmu-mir-23a;bta-mir-23a;age-mir-23a;eca-mir-23a;lca-mir-23a;rno-mir-23a;cfa-mir-23a;	cggctggggttcctggggatgggatttgctgcctgtcacaaATCACATTGCCAGGGATTTCCAatcgacc	70	chr2	56861202	56861223	56861159	56861228
94	gp1a	miR-129-3p-19234	AAGCCCTTACCCCAAAAAGCAT	22	ssc-mir-129;hsa-mir-129-2;mmu-mir-129-2;mml-mir-129-2;bta-mir-129-2;rno-mir-129-2;ptr-mir-129-2;eca-mir-129b;cfa-mir-129-2;	cttcgtgaatCTTTTTGCGGTCTGGGCTTGCtgtacataactcaatagccggaagcccttaccccaaaaagcattcgcgg	80	chr2	17100330	17100351	17100324	17100403
95	gp1a	miR-191-3p-33349	GCTGCACTTGGATTTCGTTCC	21	ssc-mir-191;hsa-mir-191;mmu-mir-191;rno-mir-191;bta-mir-191;ptr-mir-191;eca-mir-191;mdo-mir-191;cfa-mir-191;	acagcgggCAACGGAATCCCAAAAGCAGCTGttgtctccagagcattccagctgcacttggatttcgttccctgctctct	80	chr13	26605650	26605670	26605641	26605720
96	gp1a	miR-23b-3p-289	ATCACATTGCCAGGGATTACCA	22	ssc-mir-23b;hsa-mir-23b;mmu-mir-23b;eca-mir-23b;mdo-mir-23b;bta-mir-23b;cfa-mir-23b;	ctctggctgcttgggttcctggcatgctgatttgtgacttaagattaaaATCACATTGCCAGGGATTACCACGcagccac	80	chr10	26149019	26149040	26149010	26149089
97	gp1a	miR-128-3p-181	TCACAGTGAACCGGTCTCTTT	21	ssc-mir-128-2;hsa-mir-128-2;mmu-mir-128-2;bta-mir-128-2;eca-mir-128;rno-mir-128-2;ptr-mir-128-2;cfa-mir-128-2;	gcagtgggaaggggggccgaggcactgtccgagagtgagtagcaggtcTCACAGTGAACCGGTCTCTTTccctactgtgt	80	chr13	17766911	17766931	17766863	17766942
98	gp1a	miR-181a-5p-39722	AACATTCAACGCTGTCG	17	ssc-mir-181a-2;bta-mir-181a-2;eca-mir-181a;cfa-mir-181a-2;	actccaaggAACATTCAACGCTGTCGGTGAGTTtgggatttgaaaaaaccaccgaccgttgactgtaccttggggttctt	80	chr1	280334015	280334031	280334006	280334085
99	gp1a	miR-331-5p-36264	TCTAGGTATGGTCCCAGGGAT	21	ssc-mir-331;hsa-mir-331;mmu-mir-331;mml-mir-331;ptr-mir-331;rno-mir-331;cfa-mir-331;eca-mir-331;ppy-mir-331;	ttgtttgggtttgttctaggtatggtcccagggatcccagatcaaaccagGCCCCTGGGCCTATCCTAGAAccaacctaa	80	chr5	82983764	82983784	82983750	82983829
100	gp1a	miR-24-5p-54188	GTGCCTACTGAGCTGATATCA	21	ssc-mir-24-2;hsa-mir-24-1;mmu-mir-24-1;ptr-mir-24-1;cfa-mir-24-1;mdo-mir-24-1;	gacccgccctccggtgcctactgagctgatatcagttctcattttacacacTGGCTCAGTTCAGCAGGAACAGGagtcga	80	chr10	26148276	26148296	26148230	26148309
101	gp1a	miR-193a-5p-3014	TGGGTCTTTGCGGGCGAGATGA	22	ssc-mir-193a;mmu-mir-193;mml-mir-193a;eca-mir-193a;bta-mir-193a;mdo-mir-193;cfa-mir-193a;	gcgggagctgagggcTGGGTCTTTGCGGGCGAGATGAgggtgttggttcaactggcctacaaagtcccagtcctcggccc	80	chr12	41119475	41119496	41119432	41119511
102	gp1a	PC-326-3p-33634	GCCTCGTCTGTCTGTTGGGCT	21	ssc-mir-326;hsa-mir-326;mmu-mir-326;bta-mir-326;eca-mir-326;ptr-mir-326;cfa-mir-326;	tctgtctgttgggctggaggcagggcctttgtgcaggcgggttgtgctcagatcgCCTCTGGGCCCTTCCTCCAGCccagaggcggattca	91	chr9	9132306	9132324	9132230	9132320
103	gp1a	miR-130b-5p-1805	ACTCTTTCCCTGTTGCACTACT	22	ssc-mir-130b;hsa-mir-130b;mmu-mir-130b;mml-mir-130b;bta-mir-130b;rno-mir-130b;ppy-mir-130b;eca-mir-130b;ptr-mir-130b;cfa-mir-130b;	gcctgcctgacactctttccctgttgcactactgtgggccactgggaagCAGTGCAATGATGAAAGGGCATcagtcaggc	80	chr14	51318826	51318847	51318779	51318858
104	gp1a	miR-769-5p-11763	TGAGACCTCTGGGTTCTGAGCT	22	ssc-mir-769;	tgcgctctgaccTGAGACCTCTGGGTTCTGAGCTgtgatgttgcttccaagctgggatctctggggtcttggttcagggt	80	chr6	36259150	36259171	36259104	36259183
105	gp1a	miR-365-3p-1379	TAATGCCCCTAAAAATCCTTAT	22	ssc-mir-365-1;hsa-mir-365-1;mmu-mir-365-1;ptr-mir-365-1;mdo-mir-365;bta-mir-365;oan-mir-365;	cgcagggaaaatgagggacttttgggggcagatgtgtttccattccactatcaTAATGCCCCTAAAAATCCTTATtgctc	80	chr3	26344245	26344266	26344192	26344271
106	gp1a	miR-22-3p-405	AAGCTGCCAGTTGAAGAACTGT	22	ssc-mir-22;hsa-mir-22;mmu-mir-22;rno-mir-22;sla-mir-22;cfa-mir-22;	gagccgcagtagttcttcagtggcaagctttatgtcctgacccagctaAAGCTGCCAGTTGAAGAACTGTtgccctctgc	80	chr12	45319091	45319112	45319043	45319122
107	gp1a	miR-214-5p-15474	TGCCTGTCTACACTTGCTGTGC	22	ssc-mir-214;hsa-mir-214;oan-mir-214;mdo-mir-214;rno-mir-214;eca-mir-214;	ggcctggctggacggagttgtcatgtgtctgcctgtctacacttgctgtgcagaacatccgctcacctgtACAGCAGGCACAGACAGGCAGTcacatgacaacccagcct	110	chr9	107639212	107639233	107639153	107639262
108	gp1a	miR-125a-5p-735	TCCCTGAGACCCTTTAACCTGTG	23	ssc-mir-125a;hsa-mir-125a;mmu-mir-125a;bta-mir-125a;mml-mir-125a;rno-mir-125a;ptr-mir-125a;eca-mir-125a;cfa-mir-125a;	ggcctctgagTCCCTGAGACCCTTTAACCTGTGaggacatccagggtcacaggtgaggttcttgggagcctggcgtccgg	80	chr6	39533861	39533883	39533851	39533930
109	gp1a	miR-204-3p-7373	GCTGGGAAGGCAAAGGGACGT	21	ssc-mir-204;hsa-mir-204;mmu-mir-204;rno-mir-204;bta-mir-204;cfa-mir-204;	ggctacagtccttctcatgtgactcgtggacTTCCCTTTGTCATCCTATGCCTgagaatatatgaaggaggctgggaaggcaaagggacgttcaattgtcatcactggc	109	chr1	234511643	234511663	234511625	234511733
110	gp1a	miR-361-3p-20029	CCCCCAGGTGTGATTCTGATTTGC	24	ssc-mir-361;hsa-mir-361;mmu-mir-361;bta-mir-361;eca-mir-361;ptr-mir-361;cfa-mir-361;rno-mir-361;	ggagcTTATCAGAATCTCCAGGGGTACttataatttgaaaaagtcccccaggtgtgattctgatttgcttcctcctcctc	80	chrX	67904198	67904221	67904186	67904265
111	gp1a	miR-361-5p-2779	TTATCAGAATCTCCAGGGGTAC	22	ssc-mir-361;hsa-mir-361;mmu-mir-361;bta-mir-361;eca-mir-361;ptr-mir-361;cfa-mir-361;rno-mir-361;	ggagcTTATCAGAATCTCCAGGGGTACttataatttgaaaaagtcccccaggtgtgattctgatttgcttcctcctcctc	80	chrX	67904239	67904260	67904186	67904265
112	gp1a	miR-497-5p-5546	CAGCAGCACACTGTGGTTTGTA	22	ssc-mir-497;hsa-mir-497;mmu-mir-497;bta-mir-497;ppy-mir-497;ptr-mir-497;eca-mir-497;cfa-mir-497;	cccgcccCAGCAGCACACTGTGGTTTGTAcggcactgtggccacgtccaaaccacactgtggtgttagagcgagggtggg	80	chr12	49575601	49575622	49575594	49575673
113	gp1a	miR-34c-5p-625	AGGCAGTGTAGTTAGCTGATTGC	23	ssc-mir-34c;hsa-mir-34c;mmu-mir-34c;bta-mir-34c;mml-mir-34c;ptr-mir-34c;cfa-mir-34c;	agtctagttactAGGCAGTGTAGTTAGCTGATTGCtgataaaaccaatcactaaccacacggccaggtaaaaagatttgg	80	chr9	38211170	38211192	38211158	38211237
114	gp1a	miR-1307-5p-10307	TCGACCGGACCTCGACCGGCTC	22	ssc-mir-1307;hsa-mir-1307;cfa-mir-1307;	ctaccaatctcgaccggacctcgaccggctcgtctatgttgccaatcgACTCGGCGTGGCGTCGGTCGTGGtagataggc	80	chr14	119440252	119440273	119440203	119440282
115	gp1a	miR-181b-3p-24826	GAACTGTGTAGACAAG	16	ssc-mir-181b-1;hsa-mir-181b-1;mmu-mir-181b-1;mml-mir-181b-1;ptr-mir-181b-1;ppy-mir-181b;bta-mir-181b-1;rno-mir-181b-1;mdo-mir-181b;cfa-mir-181b-1;	ggtcacaatcAACATTCATTGCTGTCGGTGGGTTgaactgtgtagacaagctcactgaacaatgaatgcaactgtggccc	80	chr10	22839221	22839236	22839191	22839270
116	gp1a	miR-27b-3p-120	TTCACAGTGGCTAAGTTCTGC	21	ssc-mir-27b;hsa-mir-27b;mmu-mir-27b;bta-mir-27b;ptr-mir-27b;mdo-mir-27b;eca-mir-27b;cfa-mir-27b;	acgaggtgcagagcttagctgattggtgaacagtgactggtttccgctttgTTCACAGTGGCTAAGTTCTGCacctgaag	80	chr10	26148784	26148804	26148776	26148855
117	gp1a	miR-34c-3p-39896	ATCACTAACCACACGGCCAGG	21	ssc-mir-34c;hsa-mir-34c;mmu-mir-34c;bta-mir-34c;mml-mir-34c;ptr-mir-34c;cfa-mir-34c;	agtctagttactAGGCAGTGTAGTTAGCTGATTGCtgataaaaccaatcactaaccacacggccaggtaaaaagatttgg	80	chr9	38211204	38211224	38211158	38211237
118	gp1a	miR-181b-5p-34723	AACATTCATTGCTGTC	16	ssc-mir-181b-2;hsa-mir-181b-2;mmu-mir-181b-2;mml-mir-181b-2;ptr-mir-181b-2;bta-mir-181b-2;rno-mir-181b-2;cfa-mir-181b-2;	atggctgcactcAACATTCATTGCTGTCGGTGGGTTTgagtctgaatcaactcactgatcaatgaatgcaaactgcggaccaaaca	86	chr1	280335880	280335895	280335868	280335953
119	gp1a	miR-30c-3p-5525	CTGGGAGAAGGCTGTTTACTCT	22	ssc-mir-30c;hsa-mir-30c-2;mmu-mir-30c-2;rno-mir-30c-2;bta-mir-30f;mml-mir-30c-2;cfa-mir-30c-2;eca-mir-30c-2;	gacagatacTGTAAACATCCTACACTCTCAGCTgtggaaagtaagaaagctgggagaaggctgtttactctctctgcctt	80	chr1	53819915	53819936	53819906	53819985
120	gp1a	miR-29c-5p-34060	ACCGATTTCTCCTGGTGTTCAGA	23	ssc-mir-29c;hsa-mir-29c;oan-mir-29a-2;ptr-mir-29c;bta-mir-29d;eca-mir-29c-2;cfa-mir-29c-1;	atctcttacacaggctgaccgatttctcctggtgttcagagtctgtttttgtcTAGCACCATTTGAAATCGGTTAtgatgtaggggga	88	chr9	127174343	127174365	127174326	127174413
121	gp1a	miR-503-5p-408	TAGCAGCGGGAACAGTACTGCAG	23	ssc-mir-503;hsa-mir-503;eca-mir-503;ptr-mir-503;cfa-mir-503;	gccccgcactcagccgtgcccTAGCAGCGGGAACAGTACTGCAGtgggcgatcggtactctggggtattgtttctgctgcccgggcaaggctgggactcccgccggggc	109	chrX	108498730	108498752	108498665	108498773
122	gp1a	miR-133a-3p-1466	TTGGTCCCCTTCAACCAGCTGT	22	ssc-mir-133a;hsa-mir-133a-2;mmu-mir-133a-1;ptr-mir-133a-2;bta-mir-133a-1;cfa-mir-133c;mdo-mir-133a;rno-mir-133a;cfa-mir-133a;eca-mir-133a-2;eca-mir-133a;	cgggacccaaatgctttgctaaagctggtaaaatggaaccaaatcaactgttgaatggatTTGGTCCCCTTCAACCAGCTGTagctgcgcattgacagcgccg	103	chr17	64053964	64053985	64053943	64054045
123	gp1a	miR-27a-3p-1818	TTCACAGTGGCTAAGTTCCG	20	ssc-mir-27a;hsa-mir-27a;mmu-mir-27a;bta-mir-27a;rno-mir-27a;mne-mir-27a;eca-mir-27a;ppy-mir-27a;lca-mir-27a;cfa-mir-27a;	tggcctggggagcagggcttagctgcttgtgagcaggtccacagcaagtcgtgTTCACAGTGGCTAAGTTCCGccccctgga	82	chr2	56860979	56860998	56860970	56861051
124	gp1a	miR-28-5p-30328	AAGGAGCTCACAGTCTATTGAGT	23	ssc-mir-28;hsa-mir-28;mmu-mir-28;age-mir-28;bta-mir-28;mne-mir-28;ppy-mir-28;mml-mir-28;sla-mir-28;cfa-mir-28;	ggtccttgccctcaaggagctcacagtctattgagttgcctttctgtcttcccCACTAGATTGTGAGCTCCTGGAgggcaggcact	86	chr13	95264243	95264265	95264193	95264278
125	gp1a	miR-744-5p-589	TGCGGGGCTAGGGCTAACAGCA	22	ssc-mir-744;hsa-mir-744;mmu-mir-744;ptr-mir-744;bta-mir-744;	gcagggTGCGGGGCTAGGGCTAACAGCAgtcttactgaaggtttcctggaaaccacgcacatgctgttgccactaacctc	80	chr7	108483616	108483637	108483610	108483689
126	gp1a	miR-125a-3p-38755	ACAGGTGAGGTTCTTGGGAGCAT	23	ssc-mir-125a;hsa-mir-125a;mmu-mir-125a;bta-mir-125a;mml-mir-125a;rno-mir-125a;ptr-mir-125a;eca-mir-125a;cfa-mir-125a;	ggcctctgagTCCCTGAGACCCTTTAACCTGTGaggacatccagggtcacaggtgaggttcttgggagcctggcgtccgg	80	chr6	39533899	39533921	39533851	39533930
127	gp1a	miR-98-5p-200	TGAGGTAGTAAGTTGTATTGTT	22	ssc-mir-98;hsa-mir-98;mmu-mir-98;eca-mir-98;bta-mir-98;rno-mir-98;cfa-mir-98;age-mir-98;	gggTGAGGTAGTAAGTTGTATTGTTgtggggtagggattttaggccccaattagaagataactatacaacttactacttt	80	chrX	45719554	45719575	45719499	45719578
128	gp1a	miR-224-5p-14436	CAAGTCACTAGTGGTTCCGTTTA	23	ssc-mir-224;hsa-mir-224;eca-mir-224;rno-mir-224;bta-mir-224;cfa-mir-224;	gggctttCAAGTCACTAGTGGTTCCGTTTAgtagaaggttttgcattgtttcaaaatggtgccctagtgactacaaagccc	81	chrX	121480685	121480707	121480634	121480714
129	gp1a	miR-432-5p-807	TCTTGGAGTAGGTCATTGGGTG	22	ssc-mir-432;hsa-mir-432;eca-mir-432;mml-mir-432;ptr-mir-432;ptr-mir-432;bta-mir-432;	tccaggTCTTGGAGTAGGTCATTGGGTGgatcctttatttccctatgtgggccactggatggctcctccatggcttggag	80	chr7	133834163	133834184	133834157	133834236
130	gp1a	miR-7g-5p-6	TGAGGTAGTAGTTTGTACAGTT	22	ssc-let-7g;hsa-let-7g;mmu-let-7g;mdo-let-7g;oan-let-7g;cfa-let-7g;	ggcTGAGGTAGTAGTTTGTACAGTTtgagggtctatgataccacccggtacaggagataactgtacaggccactgccttg	80	chr13	28999422	28999443	28999419	28999498
131	gp1a	miR-105-3p-20193	CCACGGATGTTTGAGCATGTGT	22	ssc-mir-105-2;ssc-mir-105-1;hsa-mir-105-2;hsa-mir-105-1;bta-mir-105b;cfa-mir-105b;eca-mir-105;	tgtgcatcgtggtcaaatgctcagactccttggtggctgcttatgcaCCACGGATGTTTGAGCATGTGCtatggtgtcta	80	chrX	121720306	121720327	121720259	121720338
132	gp1a	miR-125b-5p-150	TCCCTGAGACCCTAACTTGTGA	22	ssc-mir-125b-1;hsa-mir-125b-1;mmu-mir-125b-1;eca-mir-125b;rno-mir-125b-1;ppa-mir-125b;bta-mir-125b-1;cfa-mir-125b-1;mdo-mir-125b-2;	cctctcagTCCCTGAGACCCTAACTTGTGAtgtttaccgtttaaatccacgggttaggctcttgggagctgcgagccgtg	80	chr9	47573217	47573238	47573167	47573246
133	gp1a	miR-205-5p-304	TCCTTCATTCCACCGGAGTCTGT	23	ssc-mir-205;mmu-mir-205;eca-mir-205;cfa-mir-205;mdo-mir-205a;	ctcttgTCCTTCATTCCACCGGAGTCTGTctcatacccaaccagatttcagtggagtgaagctcaggag	69	chr9	126011628	126011650	126011588	126011656
134	gp1a	miR-30a-5p-186	TGTAAACATCCTCGACTGGAAGCT	24	ssc-mir-30a;hsa-mir-30a;bta-mir-30a;mdo-mir-30a;mml-mir-30a;cfa-mir-30a;	tccctgcgacagtgagcggcTGTAAACATCCTCGACTGGAAGCTgtgaggctgaagacgggctttcagtcggatgtttgcagccgccgactgcctcccgcatcagga	107	chr1	53849061	53849084	53848998	53849104
135	gp1a	PC-328-5p-13456	CTGGCCCTCTCTGCCCTTCCGT	22	ssc-mir-328;hsa-mir-328;bta-mir-328;eca-mir-328;ptr-mir-328;ppy-mir-328;cfa-mir-328;	ggagcgggggggcaggaggggctcagggagaaagtgtgtgccgcccCTGGCCCTCTCTGCCCTTCCGTcccccgttcctg	80	chr6	13347475	13347496	13347429	13347508
136	gp1a	miR-335-3p-18172	TTTTTCATTATTGCTCCTGACC	22	ssc-mir-335;hsa-mir-335;bta-mir-335;ppy-mir-335;ptr-mir-335;mml-mir-335;eca-mir-335;cfa-mir-335;	cttttgggcgggggTCAAGAGCAATAACGAAAAATGtttgtcataaaccgtttttcattattgctcctgacctcctctca	80	chr18	16506719	16506740	16506711	16506790
137	gp1a	miR-365-5p-11544	AGGGACTTTTGGGGGCAGATGTG	23	ssc-mir-365-1;hsa-mir-365-1;mmu-mir-365-1;ptr-mir-365-1;mdo-mir-365;bta-mir-365;oan-mir-365;	cgcagggaaaatgagggacttttgggggcagatgtgtttccattccactatcaTAATGCCCCTAAAAATCCTTATtgctc	80	chr3	26344205	26344227	26344192	26344271
138	gp1a	miR-503-3p-26240	GGGGTATTGTTTCTGCTGCCCGG	23	ssc-mir-503;hsa-mir-503;eca-mir-503;ptr-mir-503;cfa-mir-503;	gccccgcactcagccgtgcccTAGCAGCGGGAACAGTACTGCAGtgggcgatcggtactctggggtattgtttctgctgcccgggcaaggctgggactcccgccggggc	109	chrX	108498690	108498712	108498665	108498773
139	gp1a	miR-424-5p-2477	CAGCAGCAATTCATGTTTTGA	21	ssc-mir-424;bta-mir-424;eca-mir-424;cfa-mir-424;	tccgaggggatgCAGCAGCAATTCATGTTTTGAagggctttaaatggttcaaaacgtgaggcgctgctataccccctcgc	80	chrX	108499058	108499078	108499011	108499090
140	gp1a	miR-363-5p-23718	GGGTGGATCACGATGCAATTTT	22	ssc-mir-363;hsa-mir-363;oan-mir-363;rno-mir-363;mml-mir-363;eca-mir-363;bta-mir-363;mdo-mir-363;cfa-mir-363;	gctgttgtcgggtggatcacgatgcaattttgattagtatcataggagaaaAATTGCACGGTATCCATCTGTAaaccgca	80	chrX	108178370	108178391	108178321	108178400
141	gp1a	miR-199b-5p-484	CCCAGTGTTTAGACTATCTGTTC	23	ssc-mir-199b;hsa-mir-199b;mmu-mir-199b;ptr-mir-199b;bta-mir-199b;ppy-mir-199b;mdo-mir-199b;eca-mir-199b;cfa-mir-199-3;	ccgtctacccagtgtttagactatctgttcaggactcccaaattgtACAGTAGTCTGCACATTGGTTAggctgg	74	chr1	283326036	283326058	283325992	283326065
142	gp1a	miR-29b-3p-19778	TAGCACCATTTGAAATCAGTGTT	23	ssc-mir-29b;hsa-mir-29b-1;mmu-mir-29b-1;rno-mir-29b-1;mdo-mir-29b;cfa-mir-29b-1;	cttcaggaagctggtttcatatggtggtttagatttaaaaagtgattgtcTAGCACCATTTGAAATCAGTGTTcttggggg	81	chr18	16054399	16054421	16054349	16054429
143	gp1a	miR-142-5p-54139	CATAAAGTAGAAAGCACTA	19	ssc-mir-142;hsa-mir-142;mmu-mir-142;oan-mir-142;ptr-mir-142;mdo-mir-142;cfa-mir-142;	gtgcagtcaccCATAAAGTAGAAAGCACTActaacagcactggagggtgtagtgtttcctactttatggatgagtgtact	80	chr12	32630453	32630471	32630403	32630482
144	gp1a	miR-221-5p-3246	ACCTGGCATACAATGTAGATTT	22	ssc-mir-221;hsa-mir-221;mmu-mir-221;eca-mir-221;bta-mir-221;ptr-mir-221;oan-mir-221;mdo-mir-221;cfa-mir-221;	tgaacctggcatacaatgtagatttctgtgtttgttgggcaacAGCTACATTGTCTGCTGGGTTTCaggc	70	chrX	40478139	40478160	40478094	40478163
145	gp1a	miR-7e-5p-24	TGAGGTAGGAGGTTGTATAGTT	22	ssc-let-7e;hsa-let-7e;mmu-let-7e;eca-let-7e;ptr-let-7e;cfa-let-7e;	gccccgggcTGAGGTAGGAGGTTGTATAGTTgaggaggacacccacggagatcactatacggcctcctagctttccccag	80	chr6	39533384	39533405	39533375	39533454
146	gp1a	miR-424-3p-3343	CAAAACGTGAGGCGCTGCTAT	21	ssc-mir-424;bta-mir-424;eca-mir-424;cfa-mir-424;	tccgaggggatgCAGCAGCAATTCATGTTTTGAagggctttaaatggttcaaaacgtgaggcgctgctataccccctcgc	80	chrX	108499021	108499041	108499011	108499090
147	gp1a	miR-325-3p-52014	TTTATTGAGCACCTCCTATCA	21	ssc-mir-325;mmu-mir-325;cfa-mir-325;	agtgcttggttcctagtaggtgttcagtaagtgtttgtgacataattcgTTTATTGAGCACCTCCTATCAatcaagcactgtgctaggttctgg	94	chrX	60496441	60496461	60496392	60496485
148	gp1a	miR-339-5p-24465	TCCCTGTCCTCCAGGAGCTCACT	23	ssc-mir-339;bta-mir-339;	gcagccgccgtccctgtcctccaggagctcacttaccttgggccgtGAGCTCCTCGAGGCCAGAGCCCgtgtctgcctct	80	chr3	406880	406902	406870	406949
149	gp1a	miR-127-5p-12072	GAAGCTCAGAGGGCTCTGATTC	22	ssc-mir-127;hsa-mir-127;mmu-mir-127;oar-mir-127;mml-mir-127;bta-mir-127;rno-mir-127;cfa-mir-127;	atcgctgtctccagcctgctgaagctcagagggctctgattcagaaagatcaTCGGATCCGTCTGAGCTTGGCTggtcgg	80	chr7	133929758	133929779	133929738	133929817
150	gp1a	miR-324-3p-38854	CACTGCCCCAGGTGCTGCTGG	21	ssc-mir-324;hsa-mir-324;mmu-mir-324;bta-mir-324;ptr-mir-324;rno-mir-324;cfa-mir-324;	ctatgcctccccgcatcccctagggcattggtgtgaagctggagacccACTGCCCCAGGTGCTGCTGGGggttgtagtct	80	chr12	49872854	49872874	49872807	49872886
151	gp1a	miR-335-5p-1176	TCAAGAGCAATAACGAAAAATG	22	ssc-mir-335;hsa-mir-335;bta-mir-335;ppy-mir-335;ptr-mir-335;mml-mir-335;eca-mir-335;cfa-mir-335;	cttttgggcgggggTCAAGAGCAATAACGAAAAATGtttgtcataaaccgtttttcattattgctcctgacctcctctca	80	chr18	16506755	16506776	16506711	16506790
152	gp1a	miR-101-3p-203	GTACAGTACTGTGATAACTGA	21	ssc-mir-101-2;hsa-mir-101-1;mmu-mir-101a;mdo-mir-101-1;lla-mir-101;cfa-mir-101-1;eca-mir-101;	ggctgccctggctcagttatcacagtgctgatgctgtccattctaaagGTACAGTACTGTGATAACTGAaggatggcagcc	81	chr6	103818856	103818876	103818808	103818888
153	gp1a	miR-125b-3p-8757	ACGGGTTAGGCTCTTGGGAG	20	ssc-mir-125b-1;hsa-mir-125b-1;mmu-mir-125b-1;eca-mir-125b;rno-mir-125b-1;ppa-mir-125b;bta-mir-125b-1;cfa-mir-125b-1;mdo-mir-125b-2;	cctctcagTCCCTGAGACCCTAACTTGTGAtgtttaccgtttaaatccacgggttaggctcttgggagctgcgagccgtg	80	chr9	47573179	47573198	47573167	47573246
154	gp1a	miR-425-3p-10639	ATCGGGAATGTCGTGTCCGCCC	22	ssc-mir-425;hsa-mir-425;mmu-mir-425;bta-mir-425;ptr-mir-425;mml-mir-425;rno-mir-425;mdo-mir-425;cfa-mir-425;	aagtgctttggAATGACACGATCACTCCCGTTGAgtgggcacccaagtagccatcgggaatgtcgtgtccgcccagtgct	80	chr13	26605157	26605178	26605151	26605230
155	gp1a	miR-196b-5p-47827	TAGGTAGTTTCCTGTTGTTGGG	22	ssc-mir-196b;hsa-mir-196b;mmu-mir-196b;ptr-mir-196b;eca-mir-196b;oan-mir-196b;mml-mir-196b;mdo-mir-196b;cfa-mir-196b;	ctggtcggtgattTAGGTAGTTTCCTGTTGTTGGGatccacctttctctcgacagcacgacactgccttcattacttcag	80	chr18	44179805	44179826	44179792	44179871
156	gp1a	miR-215-5p-37456	ATGACCTATGAATTGACAGACA	22	ssc-mir-215;eca-mir-215;bta-mir-215;	agagatggtgtacaggaaaATGACCTATGAATTGACAGACAatgtggctaaatctgtctgtcatttctgtaggccaatattctgtatatctctgct	96	chr10	9750664	9750685	9750609	9750704
157	gp1a	miR-374b-5p-5582	ATATAATACAACCTGCTAAGTG	22	ssc-mir-374b;hsa-mir-374b;mmu-mir-374;bta-mir-374b;eca-mir-374b;ptr-mir-374b;rno-mir-374;cfa-mir-374b;	tcggatggATATAATACAACCTGCTAAGTGtcctagcacttatcaggttgtattatcattgtccgtgtctatggctctcg	80	chrX	58683658	58683679	58683650	58683729
158	gp1a	miR-504-3p-35231	AGGGAGCGCAGGGCAGGGTTTCT	23	ssc-mir-504;hsa-mir-504;mmu-mir-504;cfa-mir-504;bta-mir-504;mml-mir-504;ptr-mir-504;rno-mir-504;	gctgttgggAGACCCTGGTCTGCACTCTATCtgtatgcttactgaagggagcgcagggcagggtttcccacacagagggc	80	chrX	111416506	111416528	111416461	111416540
159	gp1a	miR-193a-3p-13161	AACTGGCCTACAAAGTCCCAGT	22	ssc-mir-193a;mmu-mir-193;mml-mir-193a;eca-mir-193a;bta-mir-193a;mdo-mir-193;cfa-mir-193a;	gcgggagctgagggcTGGGTCTTTGCGGGCGAGATGAgggtgttggttcaactggcctacaaagtcccagtcctcggccc	80	chr12	41119441	41119462	41119432	41119511
160	gp1a	miR-30b-5p-5999	TGTAAACATCCTACACTCAGCT	22	ssc-mir-30b;hsa-mir-30b;age-mir-30b;ggo-mir-30b;bta-mir-30b;rno-mir-30b;cfa-mir-30b;eca-mir-30b;	tttcagttcgTGTAAACATCCTACACTCAGCTgtaatacatggattggctgggaggtggatgtttacttcagctga	76	chr4	5733594	5733615	5733584	5733659
161	gp1a	miR-7i-5p-8	TGAGGTAGTAGTTTGTGCTGTT	22	ssc-let-7i;hsa-let-7i;ptr-let-7i;	ctggcTGAGGTAGTAGTTTGTGCTGTTggtcgggttgtgacattgcccgctgtggagataactgcgcaagctactgccttgctag	85	chr5	26807369	26807390	26807364	26807448
162	gp1a	miR-92a-3p-56231	TATTGCACTTGTCCCGG	17	ssc-mir-92a-1;hsa-mir-92a-1;mmu-mir-92a-1;rno-mir-92a-1;mdo-mir-92;eca-mir-92a;cfa-mir-92a-1;	ctttctacacaggttgggatcggttgcaatgctgtgtttctgtatggTATTGCACTTGTCCCGGCCTGTTGagtttggtg	80	chr11	60973207	60973223	60973160	60973239
163	gp1a	miR-29c-3p-3655	TAGCACCATTTGAAATCGGTTA	22	ssc-mir-29c;hsa-mir-29c;oan-mir-29a-2;ptr-mir-29c;bta-mir-29d;eca-mir-29c-2;cfa-mir-29c-1;	atctcttacacaggctgaccgatttctcctggtgttcagagtctgtttttgtcTAGCACCATTTGAAATCGGTTAtgatgtaggggga	88	chr9	127174379	127174400	127174326	127174413
164	gp1a	miR-92a-5p-27412	GGGTGGGGATTTGTTGCATTACT	23	ssc-mir-92a-2;hsa-mir-92a-2;eca-mir-92a-2;lca-mir-92-2;bta-mir-92;cfa-mir-92a-2;	ctttcatccgtgggtggggatttgttgcattacttgtggtgtgtataaagTATTGCACTTGTCCCGGCCTGTGGaagaaa	80	chrX	108178532	108178554	108178486	108178565
165	gp1a	miR-28-3p-522	CACTAGATTGTGAGCTCCTGGA	22	ssc-mir-28;hsa-mir-28;mmu-mir-28;age-mir-28;bta-mir-28;mne-mir-28;ppy-mir-28;mml-mir-28;sla-mir-28;cfa-mir-28;	ggtccttgccctcaaggagctcacagtctattgagttgcctttctgtcttcccCACTAGATTGTGAGCTCCTGGAgggcaggcact	86	chr13	95264204	95264225	95264193	95264278
166	gp1a	miR-103-5p-33548	AGCTTCTTTACAGTGCTGCCTTG	23	ssc-mir-103-2;hsa-mir-103-2;mmu-mir-103-2;cfa-mir-103-2;bta-mir-103-2;ptr-mir-103-2;eca-mir-103;mdo-mir-103-2;cfa-mir-103-1;cfa-mir-107;	tgtgctttcagcttctttacagtgctgccttgtagcattcaggtcaAGCAGCATTGTACAGGGCTATGAaagaactaaga	80	chr17	33406537	33406559	33406489	33406568
167	gp1a	miR-183-5p-749	ATGGCACTGGTAGAATTCACTG	22	ssc-mir-183;hsa-mir-183;mmu-mir-183;mml-mir-183;sla-mir-183;rno-mir-183;ppy-mir-183;mdo-mir-183;eca-mir-183;cfa-mir-183;	ctgtgtATGGCACTGGTAGAATTCACTGtgaacagtctcggtcagtgaattaccgaagggccataaacag	70	chr18	17172280	17172301	17172238	17172307
168	gp1a	miR-7a-5p-3	TGAGGTAGTAGGTTGTATAGTT	22	ssc-let-7a;hsa-let-7a-2;mmu-let-7a-2;cfa-let-7a-2;rno-let-7a-2;mdo-let-7a-2;ptr-let-7a-2;mml-let-7a-2;	cccaggtTGAGGTAGTAGGTTGTATAGTTtagaattgtatcaagggagataactgtacagcctcctagctttccttgggt	80	chr9	47697449	47697470	47697398	47697477
169	gp1a	miR-455-5p-4494	TATGTGCCTTTGGACTACATCG	22	ssc-mir-455;hsa-mir-455;mmu-mir-455;ptr-mir-455;bta-mir-455;mdo-mir-455;rno-mir-455;cfa-mir-455;	tggcgtgagggtatgtgcctttggactacatcgtggaagccagcaccatGCAGTCCATGGGCATATACACttgcctcaag	80	chr1	267848318	267848339	267848307	267848386
170	gp1a	miR-152-3p-144	TCAGTGCATGACAGAACTTGG	21	ssc-mir-152;hsa-mir-152;mmu-mir-152;bta-mir-152;ptr-mir-152;rno-mir-152;mdo-mir-152;cfa-mir-152;	cggcccaggttctgtgatacactccgactcgggctctggagcagTCAGTGCATGACAGAACTTGGgcccggacggacctt	80	chr12	21743259	21743279	21743215	21743294
171	gp1a	miR-24-3p-205	TGGCTCAGTTCAGCAGGAACAG	22	ssc-mir-24-1;hsa-mir-24-2;bta-mir-24-2;mml-mir-24-2;eca-mir-24;cfa-mir-24-2;mdo-mir-24-2;	ctctgcctcccgtgcctactgagctgaaacacagttgatttgtgcagacTGGCTCAGTTCAGCAGGAACAGg	72	chr2	56860822	56860843	56860821	56860892
172	gp1a	miR-423-5p-80	TGAGGGGCAGAGAGCGAGACTTT	23	ssc-mir-423;hsa-mir-423;mmu-mir-423;mml-mir-423;ptr-mir-423;ppy-mir-423;rno-mir-423;eca-mir-423;cfa-mir-423a;	aagttaggcTGAGGGGCAGAGAGCGAGACTTTtctattttccaaaagctcggtctgaggcccctcagtcttgcttcctac	80	chr12	44150509	44150531	44150500	44150579
173	gp1a	miR-127-3p-188	TCGGATCCGTCTGAGCTTGGCT	22	ssc-mir-127;hsa-mir-127;mmu-mir-127;oar-mir-127;mml-mir-127;bta-mir-127;rno-mir-127;cfa-mir-127;	atcgctgtctccagcctgctgaagctcagagggctctgattcagaaagatcaTCGGATCCGTCTGAGCTTGGCTggtcgg	80	chr7	133929790	133929811	133929738	133929817
174	gp1a	miR-130b-3p-639	CAGTGCAATGATGAAAGGGCAT	22	ssc-mir-130b;hsa-mir-130b;mmu-mir-130b;mml-mir-130b;bta-mir-130b;rno-mir-130b;ppy-mir-130b;eca-mir-130b;ptr-mir-130b;cfa-mir-130b;	gcctgcctgacactctttccctgttgcactactgtgggccactgggaagCAGTGCAATGATGAAAGGGCATcagtcaggc	80	chr14	51318788	51318809	51318779	51318858
175	gp1a	miR-181c-3p-6759	ACCATCGACCGTTGAGTGGACC	22	ssc-mir-181c;hsa-mir-181c;mmu-mir-181c;rno-mir-181c;bta-mir-181c;ppy-mir-181c;mml-mir-181c;cfa-mir-181c;mdo-mir-181c;	caagggtttgggggAACATTCAACCTGTCGGTGAGTTTgggcagctcaggcaaaccatcgaccgttgagtggaccccgaggcctgga	87	chr2	56889369	56889390	56889316	56889402
176	gp1a	miR-331-3p-3266	GCCCCTGGGCCTATCCTAGAA	21	ssc-mir-331;hsa-mir-331;mmu-mir-331;mml-mir-331;ptr-mir-331;rno-mir-331;cfa-mir-331;eca-mir-331;ppy-mir-331;	ttgtttgggtttgttctaggtatggtcccagggatcccagatcaaaccagGCCCCTGGGCCTATCCTAGAAccaacctaa	80	chr5	82983800	82983820	82983750	82983829
177	gp1a	miR-374b-3p-16579	CTTATCAGGTTGTATTATCATT	22	ssc-mir-374b;hsa-mir-374b;mmu-mir-374;bta-mir-374b;eca-mir-374b;ptr-mir-374b;rno-mir-374;cfa-mir-374b;	tcggatggATATAATACAACCTGCTAAGTGtcctagcacttatcaggttgtattatcattgtccgtgtctatggctctcg	80	chrX	58683688	58683709	58683650	58683729
178	gp1a	miR-199a-5p-1101	CCCAGTGTTCAGACTACCTGTTC	23	ssc-mir-199a;hsa-mir-199a-1;mmu-mir-199a-1;bta-mir-199a-2;ptr-mir-199a-1;mml-mir-199a-2;cfa-mir-199-1;	ccccgccaacccagtgttcagactacctgttcagggggctctgaatgtgtACAGTAGTCTGCACATTGGTTAggctgggc	80	chr2	52685005	52685027	52684957	52685036
179	gp1a	miR-30e-5p-341	TGTAAACATCCTTGACTGGAAGCT	24	ssc-mir-30e;hsa-mir-30e;mmu-mir-30e;bta-mir-30e;ptr-mir-30e;mml-mir-30e;cfa-mir-30e;	tttgccacTGTAAACATCCTTGACTGGAAGCTgtgaggcgttcccaggagctttcagtcggatgtttacagcggcaggct	80	chr6	121824349	121824372	121824301	121824380
180	gp1a	miR-30d-5p-94	TGTAAACATCCCCGACTGGAAGCT	24	ssc-mir-30d;hsa-mir-30d;mml-mir-30d;eca-mir-30d;bta-mir-30d;cfa-mir-30d;	ctgttgtTGTAAACATCCCCGACTGGAAGCTgtaagacatagctaagctttcagtcagatgtttgctgccaccgactct	79	chr4	5729466	5729489	5729459	5729537
181	gp1a	miR-124-3p-1392	TAAGGCACGCGGTGAATGCCAA	22	ssc-mir-124a-1;hsa-mir-124-2;mmu-mir-124-2;mml-mir-124a-1;age-mir-124a;ppy-mir-124a;bta-mir-124a-2;lla-mir-124a;mdo-mir-124a-3;cfa-mir-124-2;eca-mir-124;eca-mir-124-2;cfa-mir-124-3;cfa-mir-124-1;	tcaagaccagactctgccctccgtgttcacagcggaccttgatttaatgtcatacaatTAAGGCACGCGGTGAATGCCAAgagcggagcctacggctgcacttga	105	chr4	72452822	72452843	72452797	72452901
182	gp1a	miR-143-5p-4039	GGTGCAGTGCTGCATCTCTGG	21	ssc-mir-143;hsa-mir-143;mmu-mir-143;bta-mir-143;ppa-mir-143;mml-mir-143;rno-mir-143;eca-mir-143;mdo-mir-143;cfa-mir-143;	gtcccccagccggaggtgcagtgctgcatctctggtcagctgggagtcTGAGATGAAGCACTGTAGCTCgggaagggaga	80	chr2	136030766	136030786	136030752	136030831
183	gp1a	miR-339-3p-22035	GAGCTCCTCGAGGCCAGAGCCC	22	ssc-mir-339;bta-mir-339;	gcagccgccgtccctgtcctccaggagctcacttaccttgggccgtGAGCTCCTCGAGGCCAGAGCCCgtgtctgcctct	80	chr3	406916	406937	406870	406949
184	gp1a	miR-128-5p-55018	GGGGGCCGAGGCACTGTCCGAGA	23	ssc-mir-128-2;hsa-mir-128-2;mmu-mir-128-2;bta-mir-128-2;eca-mir-128;rno-mir-128-2;ptr-mir-128-2;cfa-mir-128-2;	gcagtgggaaggggggccgaggcactgtccgagagtgagtagcaggtcTCACAGTGAACCGGTCTCTTTccctactgtgt	80	chr13	17766874	17766896	17766863	17766942
185	gp1a	miR-7f-5p-7	TGAGGTAGTAGATTGTATAGTT	22	ssc-let-7f;ptr-let-7f-2;mdo-let-7f-2;	tgtgggaTGAGGTAGTAGATTGTATAGTTttagggtcataccccatcttggagataactatacagtctactgtctttcccacg	83	chrX	45720417	45720438	45720363	45720445
186	gp1a	miR-135a-5p-2906	TATGGCTTTTTATTCCTATGTGA	23	ssc-mir-135-1;hsa-mir-135a-1;mmu-mir-135a-1;ppa-mir-135-1;ptr-mir-135a-1;bta-mir-135a-1;cfa-mir-135a-1;eca-mir-135a;	aggcctcgctgttctcTATGGCTTTTTATTCCTATGTGAttctactgctcattcatatagggattggagccgtggcgcacggcggggaca	90	chr13	28964482	28964504	28964466	28964555
187	gp1a	miR-191-5p-82	CAACGGAATCCCAAAAGCAGCTG	23	ssc-mir-191;hsa-mir-191;mmu-mir-191;rno-mir-191;bta-mir-191;ptr-mir-191;eca-mir-191;mdo-mir-191;cfa-mir-191;	acagcgggCAACGGAATCCCAAAAGCAGCTGttgtctccagagcattccagctgcacttggatttcgttccctgctctct	80	chr13	26605690	26605712	26605641	26605720
188	gp1a	miR-27a-5p-18747	AGGGCTTAGCTGCTTGTGAGCA	22	ssc-mir-27a;hsa-mir-27a;mmu-mir-27a;bta-mir-27a;rno-mir-27a;mne-mir-27a;eca-mir-27a;ppy-mir-27a;lca-mir-27a;cfa-mir-27a;	tggcctggggagcagggcttagctgcttgtgagcaggtccacagcaagtcgtgTTCACAGTGGCTAAGTTCCGccccctgga	82	chr2	56861017	56861038	56860970	56861051
189	gp1a	miR-342-5p-4956	AGGGTGCTATCTGTGACTGAGG	22	ssc-mir-342;cfa-mir-342;	aaggtgagggtgctatctgtgactgagggacatggcgcatagaactgTCTCACACAGAAATCGCACCCGTCaccttggcc	80	chr7	130281681	130281702	130281629	130281708
190	gp1a	miR-1308-3p-49420	GCATTGTGGTTCAGTG	16	ssc-mir-1308;	gagggagaaatctagtcactccaaaatagaacaccatcagGCATTGgTGGTTCAGTGgtagaattcttgccggccagaac	80	chr9	46759537	46759553	46759497	46759576
191	gp1a	miR-486-5p-20316	TCCTGTACTGAGCTGCCCCGAG	22	ssc-mir-486;bta-mir-486;	gctggggcttcagggccagctcggacctctgacctccctgacgggTCCTGTACTGAGCTGCCCCGAGgccctcactgtgc	80	chr17	10558767	10558788	10558722	10558801
192	gp1a	miR-95-3p-50460	TTCAACGGGTATTTATTGAGCA	22	ssc-mir-95;hsa-mir-95;cfa-mir-95;bta-mir-95;ppa-mir-95;	aacacagtgggcgctcaataaatgtttgttgaattgagatgcgttaaaTTCAACGGGTATTTATTGAGCAcccactctgtg	81	chr8	3350589	3350610	3350578	3350658
193	gp1b	miR-155-5p-11894	TTAATGCTAATTGTGATAGGGGT	23	mmu-mir-155;	ctgTTAATGCTAATTGTGATAGGGGTttttacctccgtctgactcctacatgttagcattaacag	65	chr13	135049681	135049703	135049642	135049706
194	gp1b	miR-126-5p-1328	CATTATTACTTTTGGTACGCG	21	hsa-mir-126;mmu-mir-126;mml-mir-126;ppy-mir-126;ptr-mir-126;bta-mir-126;eca-mir-126;rno-mir-126;cfa-mir-126;	cgctggcgacgggaCATTATTACTTTTGGTACGCGctgtgacacttcaaactcgtaccgtgagtaataatgcgctgtcggcagc	84	chr1	294113077	294113097	294113063	294113146
195	gp1b	miR-182-5p-1627	TTTGGCAATGGTAGAACTCACACT	24	mmu-mir-182;bta-mir-182;cfa-mir-182;eca-mir-182;mdo-mir-182;	gccgccacttgcctcgcaccgttTTTGGCAATGGTAGAACTCACACTggtgagataatgggatccggtggttctagacttgccaactatggtgcgagggctcagcaagca	110	chr18	17167713	17167736	17167650	17167759
196	gp1b	miR-874-3p-24775	CTGCCCTGGCCCGAGGGACCGA	22	hsa-mir-874;mmu-mir-874;ptr-mir-874;mml-mir-874;rno-mir-874;eca-mir-874;	ttagccctgcggccccacgcaccagggtaagagagactctcgcttcCTGCCCTGGCCCGAGGGACCGActggctgggc	78	chr2	126729120	126729141	126729110	126729187
197	gp1b	miR-429-3p-734	TAATACTGTCTGGTAATGCCGT	22	eca-mir-429;	gggtgtcttaccaggcacggttagatctggttcttctgtcTAATACTGTCTGGTAATGCCGTccat	66	chr6	42894059	42894080	42894055	42894120
198	gp1b	miR-2366-3p-29027	TGGGTCACAGAAGAGGGTCTGGT	23	bta-mir-2366;	ccccagggtcctcttgtctgagccccagaaagaggagagagcgcTGGGTCACAGAAGAGGGTCTGGGgg	69	chr1	134062698	134062720	134062654	134062722
199	gp1b	miR-218-5p-53526	TTGTGCTTNATCTAACCATGTG	22	hsa-mir-218-1;mmu-mir-218-1;bta-mir-218-1;lca-mir-218;mdo-mir-218;mne-mir-218-1;mml-mir-218-1;rno-mir-218-1;cfa-mir-218-1;eca-mir-218;	gtggttatgtagcgagattttctgTTGTGCTTGATCTAACCATGTGgttgccaggtatgagtaaaacatggttctgtcaagcaccatggaacgtcacgcagctttctaca	110	chr8	11840704	11840725	11840680	11840789
200	gp1b	miR-149-5p-11097	TCTGGCTCCGTGTCTTCACTCCC	23	mmu-mir-149;eca-mir-149;mml-mir-149;ppy-mir-149;ptr-mir-149;cfa-mir-149;	gccggcgcccaggcTCTGGCTCCGTGTCTTCACTCCCgtgtgtgtccgaggagggagggagggacgggggctgtgctggggcgaacgga	89	chr15	131645497	131645519	131645445	131645533
201	gp1b	miR-451-5p-792	AAACCGTTACCATTACTGAGTTT	23	hsa-mir-451;mmu-mir-451;bta-mir-451;cfa-mir-451;eca-mir-451;ptr-mir-451;	cttgggggtggcgagcAAACCGTTACCATTACTGAGTTTagtaatggtaacggttctcttgctgcacccaga	72	chr12	42820795	42820817	42820762	42820833
202	gp1b	miR-219-3p-56939	AGAGTTGAGTCTGGACGTCCCGTT	24	cfa-mir-219-1;	tgattgtccaaacgcaattctcgagtctatagctctggccgAGAGTTGAGTCTGGACGTCCCG	63	chr7	29626607	29626628	29626566	29626628
203	gp1b	miR-182-3p-38717	GTGGTTCTAGACTTGCCAACT	21	mmu-mir-182;bta-mir-182;cfa-mir-182;eca-mir-182;mdo-mir-182;	gccgccacttgcctcgcaccgttTTTGGCAATGGTAGAACTCACACTggtgagataatgggatccggtggttctagacttgccaactatggtgcgagggctcagcaagca	110	chr18	17167673	17167693	17167650	17167759
204	gp1b	miR-2904-5p-20636	GCGGGAGCCTCGGTTG	16	bta-mir-2904-1;	acggcagcgccGCGGGAGCCTCGGTTGgcctcggatagccggtcccccgccgtccccgccggcgggccg	69	chr6	248380	248395	248338	248406
205	gp1b	miR-144-5p-13256	GGATATCATCATATACTGTAAGT	23	hsa-mir-144;mmu-mir-144;bta-mir-144;ppy-mir-144;mml-mir-144;rno-mir-144;eca-mir-144;cfa-mir-144;	gggccctggctgGGATATCATCATATACTGTAAGTttgcgatgagacactacagtatagatgatgtactagtccgggtgctccc	84	chr12	42820959	42820981	42820910	42820993
206	gp1b	miR-149-3p-13400	GAGGGAGGGACGGGGGCTGTGC	22	mmu-mir-149;eca-mir-149;mml-mir-149;ppy-mir-149;ptr-mir-149;cfa-mir-149;	gccggcgcccaggcTCTGGCTCCGTGTCTTCACTCCCgtgtgtgtccgaggagggagggagggacgggggctgtgctggggcgaacgga	89	chr15	131645458	131645479	131645445	131645533
207	gp1b	miR-301b-3p-21966	CAGTGCAATGATATTGTCAAAGCAT	25	hsa-mir-301b;bta-mir-301b;eca-mir-301b;mml-mir-301b;cfa-mir-301b;	ccccctgctggccgcaggtgctctgacgaggttgcactactgtgctttgaggagCAGTGCAATGATATTGTCAAAGCATctgggaccagccttgggg	97	chr14	51319122	51319146	51319104	51319200
208	gp1b	miR-370-5p-25384	CAGGTCACGTCTCTGCAGTTACAC	24	hsa-mir-370;mmu-mir-370;cfa-mir-370;ptr-mir-370;mml-mir-370;bta-mir-370;eca-mir-370;rno-mir-370;	agacagagaagccaggtcacgtctctgcagttacacagctcacgagtGCCTGCTGGGGTGGAACCTGGTctgtctgtct	79	chr7	133847450	133847473	133847438	133847516
209	gp1b	miR-148b-3p-24917	TCAGTGCATCACAGAACTTTGTTT	24	cfa-mir-148b;	gaagttctgttatacactcaggctgtggctctctgaaagTCAGTGCATCACAGAACTTTGT	61	chr5	18088782	18088803	18088743	18088803
210	gp1b	miR-493-5p-3333	TTGTACATGGTAGGCTTTCATT	22	hsa-mir-493;mmu-mir-493;bta-mir-493;eca-mir-493b;rno-mir-493;cfa-mir-493;	ctggcccccagggccTTGTACATGGTAGGCTTTCATTcattcgtttgcacatgcggtgaaggtctactgtgtgccaggccctgtgccag	89	chr7	133858714	133858735	133858662	133858750
211	gp1b	miR-1306-3p-16142	ACGTTGGCTCTGGTGGTGATGTT	23	cfa-mir-1306;	ccacctcccctgcaaacgtccagtgatgcagaggtaatggACGTTGGCTCTGGTGGTG	58	chr14	52728193	52728210	52728153	52728210
212	gp1b	miR-671-5p-23875	AGGAAGCCCTGGAGGGGCTGGAGG	24	hsa-mir-671;mmu-mir-671;bta-mir-671;ptr-mir-671;eca-mir-671;rno-mir-671;cfa-mir-671;	gctggtgaactggcaggccaggaagaggAGGAAGCCCTGGAGGGGCTGGAGGtgatggatgttttcctccggttctcagggctccaccttttccgggccgtggagccagggctggtgc	118	chr18	5054353	5054376	5054287	5054404
213	gp1b	miR-212-5p-17375	ACCTTGGCTCTAGACTGCTTACTG	24	hsa-mir-212;mmu-mir-212;bta-mir-212;rno-mir-212;mml-mir-212;mdo-mir-212;cfa-mir-212;eca-mir-212;	ggagccaccacgcccgggcagcgcgccggcACCTTGGCTCTAGACTGCTTACTGcccgggccgccctcagtaacagtctccagtcacggccaccgacgcctggccccgcc	110	chr12	45599960	45599983	45599904	45600013
214	gp1b	miR-187-3p-54578	TCGTGTCTTGTGTTGCAGCCGG	22	hsa-mir-187;mmu-mir-187;mml-mir-187;ppy-mir-187;bta-mir-187;cfa-mir-187;eca-mir-187;	ggccaggctcaccatgacaccgtgtgagacctcgggctacaacacgggactcgggcgctgctctgaccccTCGTGTCTTGTGTTGCAGCCGGAgggacgcaggtctgca	109	chr6	83322563	83322584	83322546	83322654
215	gp1b	miR-96-5p-13194	TTTGGCACTAGCACATTTTTGCT	23	hsa-mir-96;mmu-mir-96;rno-mir-96;bta-mir-96;cfa-mir-96;sla-mir-96;	ccacgaccacctgctgggccgatTTTGGCACTAGCACATTTTTGCTtgtgtctctccgctctgagcaattatgtgcagtgccaatatgggaaagcaggatgctgc	105	chr18	17172038	17172060	17171979	17172083
216	gp1b	miR-31-5p-42472	AGGCAAGATGCTGGCA	16	hsa-mir-31;mmu-mir-31;rno-mir-31;bta-mir-31;eca-mir-31;cfa-mir-31;	tgctcctgtaacttggaactggagaggAGGCAAGATGCTGGCATAGCTGTTaaactgagaacctgctatgccaacatattgccatctttcttgtctgacagcagc	105	chr1	209939223	209939238	209939196	209939300
217	gp1b	miR-17-3p-46722	ACTGCAGTGAAGGCACTTGTAGAA	24	cfa-mir-17;eca-mir-17;	caaagtgcttacagtgcaggtagtgataatgtgcatctACTGCAGTGAAGGCACTTGTAG	60	chr11	60972505	60972526	60972467	60972526
218	gp1b	miR-370-3p-2334	GCCTGCTGGGGTGGAACCTGGT	22	hsa-mir-370;mmu-mir-370;cfa-mir-370;ptr-mir-370;mml-mir-370;bta-mir-370;eca-mir-370;rno-mir-370;	agacagagaagccaggtcacgtctctgcagttacacagctcacgagtGCCTGCTGGGGTGGAACCTGGTctgtctgtct	79	chr7	133847485	133847506	133847438	133847516
219	gp1b	miR-1298-5p-26710	TTCATTCGGCTGTCCAGATGT	21	hsa-mir-1298;eca-mir-1298;bta-mir-1298;ptr-mir-1298;ppy-mir-1298;	aagacgagaagttaagagTTCATTCGGCTGTCCAGATGTatccaagtaccccgatatttggcaataaatacatctgggcaactgattgaacttttcacttttcatgattca	111	chrX	92106239	92106259	92106221	92106331
220	gp1b	miR-212-3p-41300	TAACAGTCTCCAGTCACGGCCA	22	hsa-mir-212;mmu-mir-212;bta-mir-212;rno-mir-212;mml-mir-212;mdo-mir-212;cfa-mir-212;eca-mir-212;	ggagccaccacgcccgggcagcgcgccggcACCTTGGCTCTAGACTGCTTACTGcccgggccgccctcagtaacagtctccagtcacggccaccgacgcctggccccgcc	110	chr12	45599922	45599943	45599904	45600013
221	gp1b	miR-490-3p-8253	CAACCTGGAGGACTCCATGCTGT	23	hsa-mir-490;mmu-mir-490;bta-mir-490;ptr-mir-490;ppy-mir-490;cfa-mir-490;eca-mir-490;	tggataccttggctggtttggaaagttcattgttcgacaccatggatccccaggtgggtcacgtttcaagatacacCAACCTGGAGGACTCCATGCTGTtgagctgttcacaagcagcggacacttcta	129	chr18	10924609	10924631	10924533	10924661
222	gp1b	miR-551a-3p-4326	GCGACCCACTCTTGGTTTCCA	21	hsa-mir-551a;ppy-mir-551a;ptr-mir-551a;mml-mir-551a;cfa-mir-551a;bta-mir-551a;eca-mir-551a;	ggggaccgcctggtgaccctggaaatccagagcgggtgaggcctgtctgactgtttctagGCGACCCACTCTTGGTTTCCAtggttgccctggaaa	96	chr6	43640523	43640543	43640508	43640603
223	gp1b	miR-421-3p-5678	ATCAACAGACATTAATTGGGCGC	23	hsa-mir-421;mmu-mir-421;ptr-mir-421;mml-mir-421;rno-mir-421;ppy-mir-421;cfa-mir-421;	gcacattgtaggcctcattaaatgtttgttgaatgaaaaaatgaatcATCAACAGACATTAATTGGGCGCctgctctgtgatctc	85	chrX	58683851	58683873	58683804	58683888
224	gp1b	miR-2887-5p-29252	GGTCCGGTGCGGAGAG	16	bta-mir-2887-1;	cgtcgggaccggGGTCCGGTGCGGAGAGcccttcgtcctgggaaacggggcgcggcc	57	chr6	248276	248291	248247	248303
225	gp1b	miR-454-3p-9708	TAGTGCAATATTGCTTATAGGGT	23	hsa-mir-454;bta-mir-454;mml-mir-454;ptr-mir-454;oan-mir-454;cfa-mir-454;eca-mir-454;	ctgtttatcaccagatcctagaaccctatcgatattgtctctgctgtgtaaatagctctgagTAGTGCAATATTGCTTATAGGGTtttggtgtttgggaagaactatgggca	112	chr12	33457342	33457364	33457315	33457426
226	gp1b	miR-30c-3p-9651	CTGGGAGAGGGTTGTTTACTCC	22	hsa-mir-30c-1;mmu-mir-30c-1;bta-mir-30c;ptr-mir-30c-1;cfa-mir-30c-1;	gtaaccatgccgtagtgcgTGTAAACATCCTACACTCTCAGCTgtgagctcgaggtggctgggagagggttgtttactccttctgccatggaaaacg	97	chr6	121821251	121821272	121821234	121821330
227	gp1b	miR-2140-5p-46938	GTGGGCCCGGGTGGAGCCGCCGC	23	mmu-mir-2140;mdo-mir-739;	cgggtggagccgccgcaggtgcAGATCTTGGTGGTAGTAGCAaatattcaaacgagaactttgaaggccgaagtggagaagggttccatgtg	92	chr6	250468	250483	250392	250483
228	gp1b	miR-2411-3p-35411	GCTGAACTGTCATACTCCCACAT	23	bta-mir-2411;	gaggcaatgtggagtgactgtcagatgcagccatcagaataggtgatttggcTGAACTGTCATACTCCCACATCCtc	77	chr4	99530705	99530727	99530701	99530777
229	gp1b	miR-384-3p-4651	ATTCCTAGAAATTGTTCACAAT	22	mmu-mir-384;eca-mir-384;rno-mir-384;cfa-mir-384;	tgttaaatcaggaattgtaaacaattcctaggtaatgtgtataatgtttgtaagtcATTCCTAGAAATTGTTCACAATgcctgtaaca	88	chrX	60374177	60374198	60374121	60374208
230	gp1b	miR-582-5p-57143	TACAGTTGTTCAACCAGTTACT	22	hsa-mir-582;mmu-mir-582;ptr-mir-582;bta-mir-582;mml-mir-582;cfa-mir-582;eca-mir-582;	atctgtgctctttggtTACAGTTGTTCAACCAGTTACTaatctaactaactgtaaccggttgaacaactgaacccaaagggtgcaaagtggaaacatt	98	chr16	36589537	36589558	36589521	36589618
231	gp1b	miR-449a-5p-16490	TGGCAGTGTATTGTTAGCTGGT	22	hsa-mir-449a;cfa-mir-449;mml-mir-449a;bta-mir-449a;eca-mir-449a;	ctgtgtgtgatgggtTGGCAGTGTATTGTTAGCTGGTtgagtatatgagtagcatcagctaacatgcaactgctgtcttattgcatata	89	chr16	31984308	31984329	31984293	31984381
232	gp1b	miR-873-3p-49454	GAGACTGATAAGTTCCCGGGA	21	hsa-mir-873;mmu-mir-873;ptr-mir-873;rno-mir-873;	gtgtgcatttgcaggaacttgtgagtctcctattgaaaatgaacagGAGACTGATAAGTTCCCGGGAacacccacaa	77	chr10	36097489	36097509	36097479	36097555
233	gp1b	miR-1983-3p-46851	CTCACCTGGAGCATGTTTTTT	21	mmu-mir-1983;	gaaagcatgctccagtggcgcaatcggttagcgcgcggtacttatacagcagtatatgtgcgggtgatgccgaggttgtgagttcgagcCTCACCTGGAGCATGTTTTCTtccctttacg	120	chr7	22803622	22803642	22803533	22803652
234	gp1b	miR-2320-3p-50422	CGATGATGGTCCCTGTGTTTG	21	bta-mir-2320;	tgtccccaTGGCACAGGGTCCAGCTGTCGGCTgtaatacccgatgggtcgatgatggtccctgtgtttgggg	72	chr6	43886645	43886665	43886642	43886713
235	gp1b	miR-20b-5p-17250	CAAAGTGCTCACAGTGCAGGTAT	23	bta-mir-20b;	agtacCAAAGTGCTCACAGTGCAGGTAGgttttgcattactctactgtagtgtgggcacttccagtact	69	chrX	108178796	108178818	108178755	108178823
236	gp1b	miR-7-3p-45112	CAACAAGTCCCAGTCTGCCGCA	22	bta-mir-7-1;eca-mir-7;cfa-mir-7-2;	cagccagccccatcTGGAAGACTAGTGATTTTGTTGTTgtctcactgcgctcaacaacaagtcccagtctgccgcatggtgccggccactgca	93	chr1	200316407	200316428	200316390	200316482
237	gp1b	miR-7a-5p-430	TGAGGTAGTAGGTTGTATAGTTTT	24	hsa-let-7a-1;mmu-let-7a-1;mdo-let-7a-1;ptr-let-7a-1;	tcttcactgtgggaTGAGGTAGTAGGTTGTATAGTTttagggtcacacccaccactgggagataactatacaatctactgtctttcctaacgtgat	96	chr3	38549770	38549793	38549756	38549851
238	gp1b	miR-126-3p-3530	CGTACCGTGAGTAATAATGCG	21	hsa-mir-126;mmu-mir-126;mml-mir-126;ppy-mir-126;ptr-mir-126;bta-mir-126;eca-mir-126;rno-mir-126;cfa-mir-126;	cgctggcgacgggaCATTATTACTTTTGGTACGCGctgtgacacttcaaactcgtaccgtgagtaataatgcgctgtcggcagc	84	chr1	294113115	294113135	294113063	294113146
239	gp1b	miR-138-5p-826	AGCTGGTGTTGTGAATCAGGCCG	23	bta-mir-138-1;cfa-mir-138a;eca-mir-138-2;	ggtgcggtggggcAGCTGGTGTTGTGAATCAGGCCGttgccaatcagagaacggctacttcacaacaccagggtcacaccccaccacagg	90	chr13	23336890	23336912	23336877	23336966
240	gp1b	miR-7f-5p-692	TGAGGTAGTAGATTGTATAGTTG	23	hsa-let-7f-1;mmu-let-7f-1;ptr-let-7f-1;eca-let-7f;cfa-let-7f;	atcagagTGAGGTAGTAGATTGTATAGTTgtggggtagtgattttaccctgttcaggagataactatacaatctattgccttccctgag	89	chr3	38550137	38550159	38550130	38550218
241	gp1b	miR-431-3p-38023	TGCAGGTCGTCTTGCAGGGCTTC	23	hsa-mir-431;mmu-mir-431;rno-mir-431;ptr-mir-431;bta-mir-431;eca-mir-431;oar-mir-431;	tcctgctcgtcctgcgaggTGTCTTGCAGGCCGTCATGCAggccacactgacggtaacgttgcaggtcgtcttgcagggcttctcgcaagacgacatcctcgtcgtcgacgacg	114	chr7	133927804	133927826	133927744	133927857
242	gp1b	miR-488-5p-33542	CCCAGATAATGGCACTCTCAAAC	23	hsa-mir-488;bta-mir-488;eca-mir-488;mml-mir-488;cfa-mir-488;ptr-mir-488;rno-mir-488;	gagaatcatctctCCCAGATAATGGCACTCTCAAACaagtttccaagttgtttgaaaggctatttcttggtcagaagactctcagtgccttctgga	96	chr9	111719039	111719061	111719026	111719121
243	gp1b	miR-138-3p-3259	GCTACTTCACAACACCAGGGT	21	bta-mir-138-1;cfa-mir-138a;eca-mir-138-2;	ggtgcggtggggcAGCTGGTGTTGTGAATCAGGCCGttgccaatcagagaacggctacttcacaacaccagggtcacaccccaccacagg	90	chr13	23336930	23336950	23336877	23336966
244	gp1b	miR-452-3p-48902	TCAGTCTCAACTGCAAAGAAGT	22	hsa-mir-452;mmu-mir-452;cfa-mir-452;bta-mir-452;ptr-mir-452;	gctaagcacttacAACTGTTTGCAGAGGAAACTGAGactttgtaactacatctcagtctcaactgcaaagaagtaagtgcttagc	85	chrX	121481696	121481717	121481685	121481769
245	gp1b	miR-296-3p-176	AGGGTTGGGCGGAGGCTTTCCT	22	bta-mir-296;eca-mir-296;	aggacccttccggagggccccccccaatcctgttgtgctggattcagAGGGTTGGGCGGAGGCTTTCCTgaaggctct	78	chr17	61587168	61587189	61587159	61587236
246	gp1b	miR-452-5p-863	AACTGTTTGCAGAGGAAACTGAG	23	hsa-mir-452;mmu-mir-452;cfa-mir-452;bta-mir-452;ptr-mir-452;	gctaagcacttacAACTGTTTGCAGAGGAAACTGAGactttgtaactacatctcagtctcaactgcaaagaagtaagtgcttagc	85	chrX	121481734	121481756	121481685	121481769
247	gp1b	miR-551a-5p-37472	GAAATCCAGAGCGGGTGAGGCCT	23	hsa-mir-551a;ppy-mir-551a;ptr-mir-551a;mml-mir-551a;cfa-mir-551a;bta-mir-551a;eca-mir-551a;	ggggaccgcctggtgaccctggaaatccagagcgggtgaggcctgtctgactgtttctagGCGACCCACTCTTGGTTTCCAtggttgccctggaaa	96	chr6	43640560	43640582	43640508	43640603
248	gp1b	miR-133b-3p-56920	TTTGGTCCCCTTCAACCAGCTGTTT	25	eca-mir-133b;	tggctggtcaaacggaaccaagtccgtcttcctgagaggtTTGGTCCCCTTCAACCAGCTA	61	chr7	53115282	53115303	53115243	53115303
249	gp1b	miR-135b-5p-2350	TATGGCTTTTCATTCCTATGTGA	23	hsa-mir-135b;mmu-mir-135b;bta-mir-135b;ptr-mir-135b;rno-mir-135b;ppy-mir-135b;eca-mir-135b;cfa-mir-135b;	gctctgctgtggccTATGGCTTTTCATTCCTATGTGAttactgttccaaactcatgtagggctaaaagccatgggctacagtgaggggcgtgctcc	96	chr9	63365129	63365151	63365115	63365210
250	gp1b	miR-218-3p-20231	ATGGTTCTGTCAAGCACCGCG	21	hsa-mir-218-2;mmu-mir-218-2;sla-mir-218-2;oan-mir-218-2;cfa-mir-218-2;bta-mir-218-2;eca-mir-218-2;	gaccagtcgccgcggggctttcctttgtgcttgatctaaccatgtGGTGGAACGATGGAAACGGAACAtggttctgtcaagcaccgcggaaagctccgcgctctcctgca	110	chr16	52397013	52397033	52396946	52397055
251	gp1b	miR-187-5p-29087	GCTACAACACGGGACTCGGGCG	22	hsa-mir-187;mmu-mir-187;mml-mir-187;ppy-mir-187;bta-mir-187;cfa-mir-187;eca-mir-187;	ggccaggctcaccatgacaccgtgtgagacctcgggctacaacacgggactcgggcgctgctctgaccccTCGTGTCTTGTGTTGCAGCCGGAgggacgcaggtctgca	109	chr6	83322598	83322619	83322546	83322654
252	gp1b	miR-218-5p-18206	GGTGGAACGATGGAAACGGAAC	22	hsa-mir-218-2;mmu-mir-218-2;sla-mir-218-2;oan-mir-218-2;cfa-mir-218-2;bta-mir-218-2;eca-mir-218-2;	gaccagtcgccgcggggctttcctttgtgcttgatctaaccatgtGGTGGAACGATGGAAACGGAACAtggttctgtcaagcaccgcggaaagctccgcgctctcctgca	110	chr16	52396991	52397012	52396946	52397055
253	gp1b	PC-371-5p-22929	ACTCAAACTGTGGGGGCACTTT	22	eca-mir-371;	ACTCAAACTGTGGGGGCACTTTctggtctagggagggaagtgccgccattttttgagtgt	60	chr6	40022202	40022223	40022202	40022261
254	gp1b	miR-7d-5p-35	AGAGGTAGTAGGTTGCATAGTT	22	hsa-let-7d;mmu-let-7d;rno-let-7d;mdo-let-7d;ptr-let-7d;eca-let-7d;bta-let-7d;	aatgggttcctaggaAGAGGTAGTAGGTTGCATAGTTttagggcagagattttgcccacaaggaggtaactatacgacctgctgcctttcttagggccttattatt	106	chr3	38552604	38552625	38552589	38552694
255	gp1b	miR-34b-5p-14844	AGGCAGTGTAATTAGCTGATTGT	23	hsa-mir-34b;mmu-mir-34b;eca-mir-34b;bta-mir-34b;cfa-mir-34b;ptr-mir-34b;ppy-mir-34b;	gtgctcggtttgtAGGCAGTGTAATTAGCTGATTGTactctggcgcttacaatcactaattccactgccatcaaaacaaggcac	84	chr9	38210612	38210634	38210599	38210682
256	gp1b	miR-2483-3p-8160	AAACATCTGGTTGGTTGAGAGA	22	bta-mir-2483;	gagtgaaaagttccgtcaaccatccagctgtttggggtgatgcaaacAAACATCTGGTTGGTTGAGAGAattttttactt	80	chrX	100547927	100547948	100547916	100547995
257	gp1b	miR-34b-3p-37237	AATCACTAATTCCACTGCCATC	22	hsa-mir-34b;mmu-mir-34b;eca-mir-34b;bta-mir-34b;cfa-mir-34b;ptr-mir-34b;ppy-mir-34b;	gtgctcggtttgtAGGCAGTGTAATTAGCTGATTGTactctggcgcttacaatcactaattccactgccatcaaaacaaggcac	84	chr9	38210649	38210670	38210599	38210682
258	gp1b	miR-132-3p-16295	TAACAGTCTACAGCCATGGTCG	22	hsa-mir-132;mmu-mir-132;bta-mir-132;rno-mir-132;eca-mir-132;mdo-mir-132;cfa-mir-132;	ccgcccccgcgtctccagggcaaccgtggctttcgattgttactgtgggaaccggaggTAACAGTCTACAGCCATGGTCGCcccgcagcacgcccacgcgc	101	chr12	45599493	45599514	45599472	45599572
259	gp1b	miR-7d-3p-4142	CTATACGACCTGCTGCCTTTCT	22	hsa-let-7d;mmu-let-7d;rno-let-7d;mdo-let-7d;ptr-let-7d;eca-let-7d;bta-let-7d;	aatgggttcctaggaAGAGGTAGTAGGTTGCATAGTTttagggcagagattttgcccacaaggaggtaactatacgacctgctgcctttcttagggccttattatt	106	chr3	38552658	38552679	38552589	38552694
260	gp1b	miR-146a-5p-5923	TGAGAACTGAATTCCATGGGTT	22	hsa-mir-146a;mmu-mir-146a;mml-mir-146a;ptr-mir-146a;eca-mir-146a;cfa-mir-146a;	cctatgtgtatactcagcttTGAGAACTGAATTCCATGGGTTgtgtcattgtcagacctgtgaagtttagttcttcagctgggatatctctatcatc	97	chr16	60604400	60604421	60604380	60604476
261	gp1b	miR-7a-3p-22829	CTATACAATCTACTGTCTTTCT	22	hsa-let-7a-1;mmu-let-7a-1;mdo-let-7a-1;ptr-let-7a-1;	tcttcactgtgggaTGAGGTAGTAGGTTGTATAGTTttagggtcacacccaccactgggagataactatacaatctactgtctttcctaacgtgat	96	chr3	38549821	38549842	38549756	38549851
262	gp1b	miR-7-5p-906	TGGAAGACTAGTGATTTTGTTGTT	24	bta-mir-7-1;eca-mir-7;cfa-mir-7-2;	cagccagccccatcTGGAAGACTAGTGATTTTGTTGTTgtctcactgcgctcaacaacaagtcccagtctgccgcatggtgccggccactgca	93	chr1	200316445	200316468	200316390	200316482
263	gp1b	miR-429-5p-55061	GTCTTACCAGGCACGGTTAGA	21	eca-mir-429;	gggtgtcttaccaggcacggttagatctggttcttctgtcTAATACTGTCTGGTAATGCCGTccat	66	chr6	42894096	42894116	42894055	42894120
264	gp1b	miR-2320-5p-8854	TGGCACAGGGTCCAGCTGTCGGCT	24	bta-mir-2320;	tgtccccaTGGCACAGGGTCCAGCTGTCGGCTgtaatacccgatgggtcgatgatggtccctgtgtttgggg	72	chr6	43886682	43886705	43886642	43886713
265	gp1b	miR-132-5p-38352	ACCGTGGCTTTCGATTGTTACT	22	hsa-mir-132;mmu-mir-132;bta-mir-132;rno-mir-132;eca-mir-132;mdo-mir-132;cfa-mir-132;	ccgcccccgcgtctccagggcaaccgtggctttcgattgttactgtgggaaccggaggTAACAGTCTACAGCCATGGTCGCcccgcagcacgcccacgcgc	101	chr12	45599529	45599550	45599472	45599572
266	gp1b	miR-216b-5p-9660	AAATCTCTGCAGGCAAATGTGA	22	hsa-mir-216b;mmu-mir-216b;eca-mir-216b;bta-mir-216b;mml-mir-216b;ptr-mir-216b;cfa-mir-216b;	gtggcagactggaAAATCTCTGCAGGCAAATGTGAtgttactaaagaaatcacacacttacctgtagagattctacagtctgacat	86	chr3	79154203	79154224	79154190	79154275
267	gp1b	miR-491-5p-13995	AGTGGGGAACCCTTCCATGAGGA	23	hsa-mir-491;mmu-mir-491;bta-mir-491;ptr-mir-491;cfa-mir-491;	aattgacttagctgggtAGTGGGGAACCCTTCCATGAGGAgtagaacactccttatgcaagattcccttctacctgactgggttgg	86	chr1	210973921	210973943	210973875	210973960
268	gp1b	miR-144-3p-40226	TACAGTATAGATGATGTACTA	21	hsa-mir-144;mmu-mir-144;bta-mir-144;ppy-mir-144;mml-mir-144;rno-mir-144;eca-mir-144;cfa-mir-144;	gggccctggctgGGATATCATCATATACTGTAAGTttgcgatgagacactacagtatagatgatgtactagtccgggtgctccc	84	chr12	42820924	42820944	42820910	42820993
269	gp1b	miR-199a-3p-56318	ACAGTAGTCTGCACATTGGTTAGA	24	hsa-mir-199a-2;mmu-mir-199a-2;rno-mir-199a;lla-mir-199a;bta-mir-199a-1;oan-mir-199;eca-mir-199a;cfa-mir-199-2;	tggaagcttctggagatcctgctccgtcgccccagtgttcagactacctgttcaggacaatgccgttgtACAGTAGTCTGCACATTGGTTAgactgggcaagggaaagcaacgccatg	118	chr9	107644948	107644971	107644923	107645040
270	gp1b	miR-301b-5p-25757	GCTCTGACGAGGTTGCACTACT	22	hsa-mir-301b;bta-mir-301b;eca-mir-301b;mml-mir-301b;cfa-mir-301b;	ccccctgctggccgcaggtgctctgacgaggttgcactactgtgctttgaggagCAGTGCAATGATATTGTCAAAGCATctgggaccagccttgggg	97	chr14	51319160	51319181	51319104	51319200
271	gp1b	miR-431-5p-35690	TGTCTTGCAGGCCGTCATGCA	21	hsa-mir-431;mmu-mir-431;rno-mir-431;ptr-mir-431;bta-mir-431;eca-mir-431;oar-mir-431;	tcctgctcgtcctgcgaggTGTCTTGCAGGCCGTCATGCAggccacactgacggtaacgttgcaggtcgtcttgcagggcttctcgcaagacgacatcctcgtcgtcgacgacg	114	chr7	133927763	133927783	133927744	133927857
272	gp1b	miR-135b-3p-42132	ATGTAGGGCTAAAAGCCATGGGT	23	hsa-mir-135b;mmu-mir-135b;bta-mir-135b;ptr-mir-135b;rno-mir-135b;ppy-mir-135b;eca-mir-135b;cfa-mir-135b;	gctctgctgtggccTATGGCTTTTCATTCCTATGTGAttactgttccaaactcatgtagggctaaaagccatgggctacagtgaggggcgtgctcc	96	chr9	63365168	63365190	63365115	63365210
273	gp1c	PC-7c-5p-34268	TAGTAGGTTGTATGGTT	17	ssc-let-7c;hsa-let-7c;mmu-let-7c-1;mmu-let-7c-2;ptr-let-7c;eca-let-7c;cfa-let-7c;	aaaagaggagaATAGTAGGTTGTATGGTTgaaagcttggtttattgggtcagaggcagttatattttatagcactactatttcttctct	89	chr1	35892971	35892987	35892911	35892999
274	gp1c	PC-15a-5p-46278	TAGCAGCACATAATGGTTT	19	ssc-mir-15a;hsa-mir-15a;mmu-mir-15a;oan-mir-15a;mdo-mir-15a;cfa-mir-15a;eca-mir-15a;	ttttgaggccttaaagtactgTAGCAGCACATCATGGTTTacatactacaatcaagatgcgaatcattatttgctgctctagaaatttaaggaaattcat	100	chr13	78787531	78787549	78787510	78787609
275	gp1c	PC-7e-5p-58372	GAGGTAGGAGGTTGTATAG	19	ssc-let-7e;hsa-let-7e;mmu-let-7e;eca-let-7e;cfa-let-7e;ptr-let-7e;	atgGAGGTGGGAGGTTGTATAGgccccttccagggagtctgattccttccatcttgac	58	chr8	74636334	74636352	74636298	74636355
276	gp1c	PC-296-3p-9208	AGGGTTGGGCGGAGGCTTT	19	bta-mir-296;	gctgagagagctggagcttctgcactgtctctgtcactattAGGGTTGGGCAGAGGCTTTggctggactcctt	73	chr13	64056639	64056657	64056626	64056698
277	gp1c	PC-103-5p-40816	AGCAGCATTGTACAGGG	17	ssc-mir-103-2;ssc-mir-107;ssc-mir-103-1;hsa-mir-103-2;hsa-mir-107;hsa-mir-103-1;mmu-mir-107;mmu-mir-103-1;mmu-mir-103-2;oan-mir-107;cfa-mir-103-2;bta-mir-103-2;oan-mir-103-1;ptr-mir-103-2;rno-mir-107;bta-mir-103-1;cfa-mir-107;mdo-mir-107;eca-mir-103;mdo-m	agAGCAGCATTGTACAGGGAtggaggctccccagtcttgtggcctctacacactgaccctgacaaagaagctgcaga	77	chr1	54133036	54133052	54133034	54133110
278	gp1c	PC-7g-5p-3653	GAGGTAGTAGTTTGTACAGT	20	ssc-let-7g;hsa-let-7g;mmu-let-7g;oan-let-7g;cfa-let-7g;mdo-let-7g;	taattttgaacttcctcAAGGTAGTAGTTTGTACAGTatctgacaggattgagtatcacagtgtattccttgagaattcagaacat	86	chr1	98967506	98967525	98967457	98967542
279	gp1c	PC-27b-3p-40686	GTGACTGGTTTCCGCTTTG	19	ssc-mir-27b;bta-mir-27b;cfa-mir-27b;eca-mir-27b;	attctggatacaagctgtttgccaaacctaagtatgGTGACTGGTTTCAGCTTTGgccagcct	63	chr13	56050112	56050130	56050104	56050166
280	gp1c	PC-103-3p-49493	GCAGCATTGTACAGGGCTA	19	ssc-mir-103-2;ssc-mir-103-1;ssc-mir-107;hsa-mir-103-2;hsa-mir-103-1;hsa-mir-107;mmu-mir-103-2;mmu-mir-103-1;mmu-mir-107;cfa-mir-103-2;bta-mir-103-2;ptr-mir-103-2;eca-mir-103;oan-mir-103-2;mdo-mir-103-2;oan-mir-103-1;bta-mir-103-1;mdo-mir-103-1;eca-mir-107	cagaacccctctggccggtccctgggctggggccattacttagcctttgaccagcagaggGCAGCATGGTACAGGGCTAggagagaaggctgcgggcgttccaagggctgttgggggagcagggtgctgggc	132	chr2	13426996	13427014	13426936	13427067
281	gp1c	PC-7f-3p-54949	GAGGTAGTAGATTGTATACTT	21	ssc-let-7f;hsa-let-7f-1;mmu-let-7f-1;oan-let-7f-1;cfa-let-7f;ptr-let-7f-1;eca-let-7f;oan-let-7f-2;ptr-let-7f-2;mdo-let-7f-2;	atcaggtttactatgtacagattttttttgtgtgtaaaataaaaaagcaagtattaaaGAGGTAGTAGATAGTATACTTcat	82	chr13	46955837	46955857	46955834	46955915
282	gp2	PC-125b-5p-29588	ACAAGTCAGGCTCTTGGGA	19	ssc-mir-125b-2;bta-mir-125b-2;eca-mir-125b-2;rno-mir-125b-2;cfa-mir-125b-2;	ggACAAGTCAGGCTCTGGGGAaaggagacaggggatggatcctggtcagtgtctggagcctgggatgaac	70	chr17	10529443	10529461	10529441	10529510
283	gp2	PC-22-3p-57394	AAGCTGCCAGTTGAAGAACTGC	22	mdo-mir-22;	cctctcctggctgagccgcagtagttcttcagtggcaagctttatgtcctgacccagctaAAGCTGCCAGTTGAAGAACTGTtgccctctgcccctggcttcgaggagg	109	chr12	45319092	45319113	45319032	45319140
284	gp2	PC-138-5p-9675	AGCTGGTGTTGTGAATCAGGCCGA	24	hsa-mir-138-2;mmu-mir-138-2;oan-mir-138-2;eca-mir-138;mdo-mir-138;rno-mir-138-2;ptr-mir-138;	gaaggtgcggtggggcAGCTGGTGTTGTGAATCAGGCCGTtgccaatcagagaacggctacttcacaacaccagggtcacaccccaccaca	91	chr13	23336891	23336914	23336875	23336965
285	gp2	PC-7b-5p-10	TGAGGTAGTAGGTTGTGTGGTT	22	hsa-let-7b;mmu-let-7c-2;mmu-let-7b;bta-let-7b;rno-let-7b;mdo-let-7b;cfa-let-7b;mml-let-7b;ptr-let-7b;oan-let-7b;	gctgtgtgcatccgggtTGAGGTAGTAGGTTGTATGGTTtagagttacaccgtgggagttaactgtacaaccttctagctttccttggagcacacttg	98	chr13	130665037	130665058	130665020	130665117
286	gp2	PC-345-3p-22893	CCCTGAACTAGGGGTCTGGAGA	22	mmu-mir-345;	aagagacccccaaacccaggtctgctgactcctagtccagtgcttgtgatggctggtgggCCCTGAACTAGGGGTCTGGAGGcctgggtttgcatttcgcc	101	chr7	130435972	130435993	130435912	130436012
287	gp3	PN-200b-3p-110	TAATACTGCCTGGTAATGATGAC	23	hsa-mir-200b;mmu-mir-200b;cfa-mir-200b;	ccagctcgggcagccgtggccatcttactgggcagcattggatggagtcaggtctcTAATACTGCCTGGTAATGATGACggcggagccctgcacg	95
288	gp3	PN-1224-5p-34251	GTGAGGACTCGGGAGGTGGAGGGTA	25	mmu-mir-1224;rno-mir-1224;	GTGAGGACTGGGGAGGTGGAGGGTAgcatcattagagccagagctctgtctcagctccctctccccccacctcttctctcctcag	85
289	gp3	PN-409-3p-335	GAATGTTGCTCGGTGAACCCCT	22	hsa-mir-409;bta-mir-409;	tggtacgcggggagaggttacccgagcaactttgcatctggacgacGAATGTTGCTCGGTGAACCCCTtttcggtatca	79
290	gp3	PN-329-5p-10165	GAGGTTTTCTGGGTTTCTGTTTC	23	hsa-mir-329-2;hsa-mir-329-1;ppy-mir-329-2;mml-mir-329-1;ptr-mir-329-2;ptr-mir-329-1;cfa-mir-329b;mml-mir-329-2;	gtggtacctgaagagaggttttctgggtttctgtttctttattgaggacgaAACACACCTGGTTAACCTCTTTtccagtatcaa	84
291	gp3	PN-377-3p-18696	ATCACACAAAGGCAACTTTTGT	22	hsa-mir-377;	ttgagcAGAGGTTGCCCTTGGTGAATTCgctttatttatgttgaatcacacaaaggcaacttttgtttg	69
292	gp3	PN-2134-3p-3545	GTGGAACCTGGTGCTAAACCAT	22	mmu-mir-2134-3;	gatccggtgcggagagccgttggtcttgggaaacggggtgcggccggaaagggggccgccgtctcgcccGTGGAACCTGGCGCTAAACCA	90
293	gp3	PN-1-3p-13186	TGGAATGTAAGGAAGTGTGTAT	22	rno-mir-1;	tgcctactcagagcacatacttctttatgtacccatatgaacatagaatgctaTGGAATGTAAAGAAGTGTGTATtttgggtaggta	87
294	gp3	PN-32-5p-39476	TATTGCACATTACTAAGTTGCAA	23	ssc-mir-32;hsa-mir-32;eca-mir-32;rno-mir-32;mdo-mir-32;cfa-mir-32;	ggagaTATTGCACATTACTAAGTTGCACgttgtcacggcctcagtgcaatttagtgtgtgtgatattttc	70
295	gp3	PN-362-5p-2229	AATCCTTGGAACCTAGGTGTGAGT	24	mmu-mir-362;cfa-mir-362;mml-mir-362;eca-mir-362;bta-mir-362;	gAATCCTTGGAACCTAGGTGTGAGTgctatttcggtgcaacacacctattcaaggattcaaagaggct	68
296	gp3	PN-93-5p-107	CAAAGTGCTGTTCGTGCAGGTAG	23	mdo-mir-93;age-mir-93;lla-mir-93;ggo-mir-93;bta-mir-93;mml-mir-93;rno-mir-93;eca-mir-93;cfa-mir-93;	agtcttggggggctcCAAAGTGCTGTTCGTGCAGGTAGtgtgataacctgacctactgctgagctagcacttccagagcccctgggaca	89
297	gp3	PN-1827-3p-10407	TGAGGCAGTAGATTGTATAGTTA	23	hsa-mir-1827;	tcagcagcacagccttcagcctaaagcaatgagaagcctctgaaaggcTGAGGCAGTAGATTGAAT	66
298	gp3	PN-485-5p-400	AGAGGCTGGCCGTGATGAATTCG	23	hsa-mir-485;rno-mir-485;bta-mir-485;cfa-mir-485;	gatacttggagagaggctggccgtgatgaattcgattcatctaaacgaGTCATACACGGCTCTCCTCTCTtctagtgtc	79
299	gp3	PN-320c-3p-11241	AAAAGCTGGGTTGAGAGGGTAA	22	hsa-mir-320c-1;hsa-mir-320c-2;ppy-mir-320c-1;ppy-mir-320c-2;	tttgcattaaaaatgaggccttctcttcccagttcttcccagagtcaggAAAAGCTGGGTTGAGAGGGTAGaaaaaaaatgatgtagg	88
300	gp3	PN-92b-3p-50709	TATTGCACTTGTCCCAGCCTGTA	23	oan-mir-92b;	tcaaaagccaggaaaagtcaaacccctttctatgcaggttgggatcagtggaaatgctgtttgcctttggTATTGCACTTGTCCCAGCCTGTTgagattactgaagattgtggctga	117
301	gp3	PN-758-3p-29208	TTTGTGACCTGGTCCACTAACT	22	ssc-mir-758;hsa-mir-758;mmu-mir-758;bta-mir-758;eca-mir-758;ptr-mir-758;cfa-mir-758;rno-mir-758;	gcctgggtacatgagaTGGTTGACCAGAGAGCACACGctttatttgtgccgtttgtgacctggtccactaaccctcagtatctaatcc	88
302	gp3	PN-106b-3p-1913	CCGCACTGTGGGTACTTGCTGC	22	hsa-mir-106b;mml-mir-106b;lla-mir-106b;bta-mir-106b;eca-mir-106b;cfa-mir-106b;	cctgccggggcTAAAGTGCTGACAGTGCAGATAgtggtcctctccgtgctaccgcactgtgggtacttgctgctccagcagg	82
303	gp3	PN-33b-5p-55245	GTGCATTGCTGTTGCATTGC	20	mml-mir-33b;ptr-mir-33b;cfa-mir-33b;bta-mir-33b;eca-mir-33b;	gcgggcggccccgcgGTGCATTGCTGTTGCATTGCacgtgtgtgaggcgggtgcagtgcctcggcagtgcagcccggagccggcccctggcaccgc	96
304	gp3	PN-33b-5p-1238	GTGCATTGTAGTTGCATTGCA	21	hsa-mir-33a;mmu-mir-33;bta-mir-33a;ppy-mir-33;eca-mir-33a;mml-mir-33a;cfa-mir-33;rno-mir-33;mdo-mir-33;	ctgcgGTGCATTGTAGTTGCATTGCAtgttctggcggtacccgtgcaatgtttccacagtgcatcacag	69
305	gp3	PN-379-3p-17668	TATGTAACACGGTCCACTAACT	22	hsa-mir-379;mmu-mir-379;bta-mir-379;eca-mir-379;mml-mir-379;ptr-mir-379;cfa-mir-379;	tggttcctgcagagaTGGTAGACTATGGAACGTAGGctttgtgatttttgacctatgtaacatggtccactaactctcagtatcca	86
306	gp3	PN-200a-5p-7019	CATCTTACCGGACAGTGCTGGA	22	cfa-mir-200a;	ctgggcctctgtgggcatcttaccggacagtgctggatttcttggcttgactcTAACACTGTCTGGTAACGATGTTcaaaggtgacccac	90
307	gp3	PN-369-3p-33810	AATAATACATGGTTGATCTTTA	22	cfa-mir-369;	agttcgaccgtgttatattcgctttattgacttcgAATAATACATGGTTGGTCTTT	56
308	gp3	PN-2138-5p-36627	GGAACGGGNTTGGCGGA	17	mmu-mir-2138;	aaccacagccaagGGAACGGGCTTGGCGGAatcagcggggaacgaagaccctgttgagcttgactctagtctagtctcctgtggcc	86
309	gp3	PN-376c-3p-2496	AACATAGAGGAAATTCCACGT	21	mmu-mir-376c;bta-mir-376c;cfa-mir-376c;	tttggtatttaaaaggtggatattccttctatgtttatgttatttgtggttaAACATAGAGGAAATTCCACGTtttcagtatcaaa	86
310	gp3	PN-320d-3p-2200	AAAAGCTGGGTTGAGAGGACGAT	23	hsa-mir-320d-1;hsa-mir-320d-2;ppy-mir-320d-1;	ttctcgtcccagttcttcccaaagttgagAAAAGCTGGGTTGAGAGGA	48
311	gp3	PN-1247-3p-11661	CGGGAACGTCGAGACTGGAGC	21	hsa-mir-1247;ptr-mir-1247;	ccgcttgcctcgcccagcgcagccccggccgctgggcgcACCCGTCCCGTTCGTCCCCGGAcgttgctctctaccccgggaacgtcgagactggagcgcccgaactgagccaccttcgcggaccccgagagcggcg	136
312	gp3	PN-486-5p-52346	TCCTGTACTGAGCTGCCCCGAGTT	24	hsa-mir-486;mmu-mir-486;eca-mir-486;ptr-mir-486;mml-mir-486;	cagccagctctgatctcgccctccctgaggggTCCTGTACTGAGCTGCCCCGAGGTccttcactgtgctcagctcggggcagctcagtacaggatgcgtcagggtgggagacaacggggaacaagcca	128
313	gp3	PN-140-5p-18632	GGTTACGTCATGCTGTTCTA	20	mne-mir-140;	tgtgtctctctctgtgtcctgccagtggttctaccctatggtaggttacgtcatgctgttctACCACAGGGTAGAACCACGGACaggataccggggcacc	100
314	gp3	PN-509-5p-29637	TACTGCAGAGAGTGGCAATCAT	22	eca-mir-509;ppy-mir-509-1;ppy-mir-509-2;ppy-mir-509-3;	catactgtgtgtggtacccTACTGCAGACAGTGGCAATCATgtataattaaaaatgattgacacctctgcaagtgtagtaacacatgacacatgagat	98
315	gp3	PN-1937b-5p-17039	ATATCCCGGACGAGCCCCCA	20	mmu-mir-1937b-3;mmu-mir-1937b-1;mmu-mir-1937b-4;mmu-mir-1937b-2;mmu-mir-1937b-5;mmu-mir-1937a;	tggggtctctgagaattggggtaggccatAAATCCCGGACGAGCCCCCAcatgtaagatccccgaagcttagtctctgctcaagtcccgggatgagctggctagcaccccaatgactcaagagaaaaccaca	132
316	gp3	PN-532-3p-10460	CCTCCCACACCCAAGGCTTGCA	22	ppy-mir-532;mml-mir-532;eca-mir-532;bta-mir-532;cfa-mir-532;	cgacttgctttctctcctcCATGCCTTGAGTGTAGGACCGTtggcatcttaattaccctcccacacccaaggcttgcagaagagcgagcct	91
317	gp3	PN-487b-5p-28138	GTGGTTATCCCTGTCCTGTTCG	22	hsa-mir-487b;mmu-mir-487b;bta-mir-487b;ptr-mir-487b;mml-mir-487b;eca-mir-487b;rno-mir-487b;cfa-mir-487b;	ttggtacttggagagtggttatccctgtcctgttcgttttactcatgtcgAATCGTACAGGGTCATCCACTTtttcagtatcaa	84
318	gp3	PN-409-3p-5527	GAATGTTGCTCGGTGAACCCCTA	23	cfa-mir-409;	AGGTTACCCGAGCAACTTTGCATctggacgacgaatgttgctcgttgaacccct	54
319	gp3	PN-668-5p-28543	GTAAGTGCGTCTCGGGTGAGCAT	23	hsa-mir-668;ppy-mir-668;ptr-mir-668;	gGTAAGTGCGCCTCGGGTGAGCATgcacttaatgtgaggtgtatgtcactcggctcggcccactacc	67
320	gp3	PN-376b-3p-13138	ATCATAGAGGAAAATCCATGT	21	hsa-mir-376b;ptr-mir-376b;ppy-mir-376b;cfa-mir-376b;bta-mir-376b;eca-mir-376b;	cagtccttctttggtatttaaaacgtggatattccttctatgtttacgtgattcctggttaATCATAGAGGAAAATCCATGTtttcagtatcaaatgctg	100
321	gp3	PN-3596-5p-30871	GGAGGCAGTAGGTTGTATAGTT	22	bta-mir-3596;	ctcgagGAAGGCAGTAGGTTGTATAGTTatcttccgagggggcaacatcactaccctgaaaccacacaacctactacctcacc	83
322	gp3	PN-496-3p-58900	TGAGTATTACATGGCCAATCTC	22	hsa-mir-496;mmu-mir-496;eca-mir-496;mml-mir-496;cfa-mir-496;ptr-mir-496;ppy-mir-496;bta-mir-496;rno-mir-496;	accctagccaggtactcgaatggaggttgtccatggtgtgttcattttatttatgaTGAGTATTACATGGCCAATCTCctttcagtactaaattcttcttggg	103
323	gp3	PN-33-3p-4671	CAGTGTTTCCACAGTGCATCA	21	hsa-mir-33a;mmu-mir-33;bta-mir-33a;ppy-mir-33;eca-mir-33a;mml-mir-33a;cfa-mir-33;rno-mir-33;mdo-mir-33;	ctgcgGTGCATTGTAGTTGCATTGCAtgttctggcggtacccgtgcaatgtttccacagtgcatcacag	69
324	gp3	PN-378-5p-25042	ACTGGACTTGGAGTCAGAAGGAT	23	bta-mir-378-2;	ggagagcACTGGACTTGGAGTCAGAAGGCTggagcttacagggcagcaccgtcatctactggtggagaactacgcc	76
325	gp3	PN-543-5p-14352	AAGTTGCCCGTGTCTTTTTCG	21	hsa-mir-543;mmu-mir-543;bta-mir-543;mml-mir-543;rno-mir-543;ptr-mir-543;eca-mir-543;cfa-mir-543;	ggtgcttaaggagaagttgcccgtgtctttttcgctttatatgtgacgAAACATTCGCGGTGCACTTCTTtttcagtatc	80
326	gp3	PN-532-5p-23788	CATGCCTTGAGTGTAGGACAGT	22	rno-mir-532;	ttttctcttccatgccttgagtgtaggactgttgacatcttaattacCCTCCCACACCCAAGGCTTGCAggagagcaag	79
327	gp3	PN-494-3p-3917	TGAAACATACACGGGAAACCTCT	23	hsa-mir-494;mmu-mir-494;bta-mir-494;rno-mir-494;ptr-mir-494;mml-mir-494;	tcgatacttgaaggagaggttatccgtgttgtcttctctttatttatgaTGAAACATACACGGGAAACCTCTtttttagtatcaa	85
328	gp3	PN-205-5p-5764	TCCTTCATTCCACCGGAGTCTGTT	24	lla-mir-205;mml-mir-205;ppy-mir-205;age-mir-205;rno-mir-205;oan-mir-205;	aaagatcctcgggcaatccatgtgcttctcttgTCCTTCATTCCACCGGAGTCTGTCtcatacccaaccagatttcagtggagtgaagttcaggaggcatggagctgacg	110
329	gp3	PN-380-5p-1636	ATGGTTGACCATAGGACATGCG	22	hsa-mir-380;mmu-mir-380;rno-mir-380;bta-mir-380;	acctgaaaagATGGTTGACCATAGAACATGCGctacttctgtgtcgtatgtagtatggtccacatcttctcattatc	77
330	gp3	PN-103-3p-30235	AGCAGCATNGTACAGGGCTATGAG	24	oan-mir-103-1;oan-mir-103-2;	cttgaactgtaaacatgtggaagattgctccttgccctcggcttctttacagtgctgccttgttgcatatggatcaAGCAGCATTGTACAGGGCTATGAGggcattgagactttatcttcaaag	124
331	gp3	PN-301-5p-2668	GCTCTGACTTTATTGCACTACT	22	hsa-mir-301a;mmu-mir-301a;oan-mir-301;mdo-mir-301;cfa-mir-301a;rno-mir-301a;	tattatggtgtgttttacgctttctgctaacgaatGCTCTGACTTTATTGCACTACTgttctttacagctagcagtgcaatagtattgtcaaagcatctgaaagcagaatacacagcagta	121
332	gp3	PN-758-5p-11774	TGGTTGACCAGAGAGCACACG	21	ssc-mir-758;hsa-mir-758;mmu-mir-758;bta-mir-758;eca-mir-758;ptr-mir-758;cfa-mir-758;rno-mir-758;	gcctgggtacatgagaTGGTTGACCAGAGAGCACACGctttatttgtgccgtttgtgacctggtccactaaccctcagtatctaatcc	88
333	gp3	PN-411-5p-771	TAGTAGACCGTATAGCGTACG	21	hsa-mir-411;ptr-mir-411;mml-mir-411;rno-mir-411;cfa-mir-411;	tggtacttggagagaTAGTAGACCGTATAGCGTACGctttatctgtgacgtatgtaacacggtccactaaccctcagtatcaaatccatccccgag	96
334	gp3	PN-26b-5p-197	TTCAAGTAATTCAGGATAGGTT	22	hsa-mir-26b;mmu-mir-26b;bta-mir-26b;ptr-mir-26b;cfa-mir-26b;	tgcccgggacccagTTCAAGTAATTCAGGATAGGTTgtgtgctgtccagcctgttctccattacttggctcgggggccggtgccc	85
335	gp3	PN-599-5p-187	TTTGATAAGCTGACATGGGACA	22	hsa-mir-599;bta-mir-599;cfa-mir-599;ptr-mir-599;mdo-mir-599;	aaagacgtgctgtccacagtgtgTTTGATAAGCTGACATGGGACAgggactcttttcactgttgtgtcagtttatcaaacccatacgtggatgac	95
336	gp3	PN-329-5p-11345	GAGGTTTTCTGGGTCTCTGTTTC	23	mmu-mir-329;	tgttcgcttctggtaccggaagaGAGGTTTTCTGGGTCTCTGTTTCtttgatgagaatgaaacacacccagctaacctttttttcagtatcaaatcc	97
337	gp3	PN-185-5p-50418	CTGGAGAGNAAGGCAGTTCCTGA	23	bta-mir-185;cfa-mir-185;	gggggtgagggaCTGGAGAGAAAGGCAGTTCCTGAtggtcccctccccaggggctggctttcctccggcccctccttcc	79
338	gp3	PN-541-5p-890	AAAGGATTCTGCTGTCGGTCCCACT	25	hsa-mir-541;mml-mir-541;	acgtcagggAAAGGATTCTGCTGTCGGTCCCACTccaaagttcacagaatgggtggtgggcacagaatctggactctgcttgtg	84
339	gp3	PN-484-5p-2677	TCAGGCTCAGTCCCCTCCCGAT	22	hsa-mir-484;mmu-mir-484;ptr-mir-484;mml-mir-484;bta-mir-484;rno-mir-484;	agcctcgTCAGGCTCAGTCCCCTCCCGATaaacccctaaatagggactttcccggggggtgaccctggcttttttggcg	79
340	gp3	PN-3168-5p-14157	GAGTTCTACAGTCCGAC	17	hsa-mir-3168;	aagatcatGAGTTCTACAGTCAGACagcctgagttggaggctcatcttcacttcttgctgtgtgaccctgggccagtgactt	82
341	gp3	PN-330-3p-2129	GCAAAGCACACGGCCTGCAGAGAGGT	26	mmu-mir-330;rno-mir-330;	gaccctttggcgatctctgcctctctgggcctgtgtcttaggctcttcaagatccaacgaGCAAAGCACAGGGCCTGCAGAGAGGTagcgctctgctc	98
342	gp3	PN-25-5p-584	AGGCGGAGACTTGGGCAATTGCT	23	bta-mir-25;rno-mir-25;mdo-mir-25;cfa-mir-25;	ggccagtgttgagaggcggagacttgggcaattgctggacgctgccccgggCATTGCACTTGTCTCGGTCTGAcagtgccggcc	84
343	gp3	PN-193b-3p-948	AACTGGCCCACAAAGTCCCGCT	22	mmu-mir-193b;oan-mir-193;bta-mir-193b;eca-mir-193b;	ggttgtgattccagagtcggggttttgagggcgagatgagtttgtgttttatccAACTGGCCCACAAAGTCCCGCTtttggtggtcactttgatc	95
344	gp3	PN-329a-3p-32943	AACACACCTGGTTAACCTTTT	21	bta-mir-329a;	gtggtacttgaggagaggttttctaggtctctgtttctttcatgaggatgaAACACACCTGGTTAACCTTTTttccagtatca	83
345	gp3	PN-7-3p-8724	CAACAAATCACAGTCTGCCATA	22	hsa-mir-7-1;	ttggatgttggcctagttctgtgtggaagactagtgattttgttgtttttagataactaaatcgaCAACAAATCACAGTCTGCCATAtggcacaggccatgcctctacag	110
346	gp3	PN-500-5p-8209	TAATCCTTGCTACCTGGGTGAGA	23	hsa-mir-500b;bta-mir-500;mml-mir-500;eca-mir-500-2;ptr-mir-500;eca-mir-500;ptr-mir-500-2;	gctccccctctctaatccttgctacctgggtgagagtgctttctgaatgcaATGCACCTGGGCAAGGATTCTGAgagagggagc	84
347	gp3	PN-598-3p-50617	TACGTCATCGTCGTCATCGTTAT	23	mmu-mir-598;	gctgatgctggcggtgatgccgatggtgcgagctgaaaatgggctgcTACGTCATCGTCGTCATCGTTATcatcatcat	79
348	gp3	PN-200a-3p-145	TAACACTGTCTGGTAACGATGTT	23	hsa-mir-200a;oan-mir-200a;mdo-mir-200a;rno-mir-200a;eca-mir-200a;bta-mir-200a;ptr-mir-200a;ppy-mir-200a;mml-mir-200a;	gcttggtgccaactgtggtcctccgtgggcatcttactagacagtgctggatttgggatctactcTAACACTGTCTGGTAACGATGTTcaaggaaggaccaatcctctacgagc	114
349	gp3	PN-188-5p-10334	CATCCCTTGCATGGTGGAGGGTT	23	hsa-mir-188;bta-mir-188;mml-mir-188;cfa-mir-188;ptr-mir-188;rno-mir-188;	tgctccctctctcaCATCCCTTGCATGGTGGAGGGTGagctttctgaaaacccctcccacatgcagggtttgcaggatggtgagcc	86
350	gp3	PN-412-5p-4020	TGGTCGACCAGTTGGAAAGTAAT	23	hsa-mir-412;ptr-mir-412;	ctggggtacggggatggaTGGTCGACCAGTTGGAAAGTAATtgtttctaatgtacttcacctggtccactagccgtccgtatccgctgcag	91
351	gp3	PN-200b-5p-2366	CATCTTACTGGGCAGCATTGGA	22	oan-mir-200b;mdo-mir-200b;eca-mir-200b;rno-mir-200b;bta-mir-200b;	tctggattcagggccgccactaccatcttactgggcagcattggatgagttctgtgtttcTAATACTGCCTGGTAATGATGAtggccgcggcccatacgcaacaacaga	109
352	gp3	PN-500-3p-3905	ATGCACCTGGGCAAGGATTCTGA	23	hsa-mir-500b;bta-mir-500;mml-mir-500;eca-mir-500-2;ptr-mir-500;eca-mir-500;ptr-mir-500-2;	gctccccctctctaatccttgctacctgggtgagagtgctttctgaatgcaATGCACCTGGGCAAGGATTCTGAgagagggagc	84
353	gp3	PN-140-5p-5323	CAGTGGTTTTACCCTATGGTAG	22	ssc-mir-140;hsa-mir-140;oan-mir-140;rno-mir-140;bta-mir-140;cfa-mir-140;	tttgtgtctgtgtgtgtctctctctgtgtcctgccagtggttttaccctatggtaggttacgtcatgctgttctACCACAGGGTAGAACCACGGACaggataccgggacgctctctgcatcgg	123
354	gp3	PN-1224-5p-3082	GTGAGGACTCGGGAGGTGGAG	21	hsa-mir-1224;bta-mir-1224;mml-mir-1224;	GTGAGGACTCGGGAGGTGGAGggtggcgctgccagggccagggcactgtctcagctcgcttctccccccacctcctctctcctcag	86
355	gp3	PN-379-5p-1421	TGGTAGACTGTGGAACGTAGG	21	hsa-mir-379;mmu-mir-379;bta-mir-379;eca-mir-379;mml-mir-379;ptr-mir-379;cfa-mir-379;	tggttcctgcagagaTGGTAGACTATGGAACGTAGGctttgtgatttttgacctatgtaacatggtccactaactctcagtatcca	86
356	gp3	PN-539-3p-9544	ATCATACAAGGACAATTTCTTT	22	hsa-mir-539;mmu-mir-539;bta-mir-539;ptr-mir-539;cfa-mir-539;rno-mir-539;	atacttgaggagaaattatccttggtgtgttcgctttatttgggatgaATCATACAAGGACAATTTCTTTctgagtat	78
357	gp3	PN-1274b-5p-339	AGGTCCCTGTTCGGGCGCCA	20	mmu-mir-1274a;	ccattcttcAGGTCCCTGTTCAGGCGCCAaactgttgctggccgtccagcggcacgcaaggaacaggtacagctgagatggca	83
358	gp3	PN-330-3p-177	GCAAAGCACACGGCCTGCAGAGA	23	hsa-mir-330;bta-mir-330;ptr-mir-330;	cttcggcgatcactgcctctctgggcctgtgtcttaggctctgcaagatcaaccgaGCAAAGCACACGGCCTGCAGAGAggcagcgctcagctc	94
359	gp3	PN-1826-3p-701	CCTGTCTGAGCGTCGCT	17	hsa-mir-1826;	attgatcatcgacacttcgaacgcaattgcagcccgggttcctcccagggctttgCCTGTCTGAGCGTCGCTtgccgatcagtag	85
360	gp3	PN-320b-3p-5073	AAAAGCTGNGTTGAGAGGGCAA	22	hsa-mir-320b-2;hsa-mir-320b-1;ppy-mir-320b-2;bta-mir-320;rno-mir-320;ppy-mir-320b-1;	tgttattttttgtcttctacctaagaattctgtctcttaggctttctcttcccagatttcccaaagttgggAAAAGCTGGGTTGAGAGGGCAAaaggaaaaaaaaagaattctgtctctgacataattagatagggaa	138
361	gp3	PN-140-3p-18	ACCACAGGGTAGAACCACGGAC	22	ssc-mir-140;hsa-mir-140;oan-mir-140;rno-mir-140;bta-mir-140;cfa-mir-140;	tttgtgtctgtgtgtgtctctctctgtgtcctgccagtggttttaccctatggtaggttacgtcatgctgttctACCACAGGGTAGAACCACGGACaggataccgggacgctctctgcatcgg	123
362	gp3	PN-655-3p-2273	ATAATACATGGTTAACCTCTTT	22	hsa-mir-655;eca-mir-655;ppy-mir-655;	aactgttcaaggatatttgaggagaggttatccgtgttatgttcgcttcattcatcatgaATAATACATGGTTAACCTCTTTttgaatatcagactc	97
363	gp3	PN-7e-5p-4024	TGAGGTAGTAGATTGAATAGTT	22	oan-let-7e;	ggctcccaccacagtcctgtccttgaggcTGAGGTAGTAGATTGAATAGTTgtggggtcacggcctccctgtgtgctaactatacaatctactgtctttcctgaggcgacagtcagttcgcc	122
364	gp3	PN-7a-5p-541	GTGAGGTAGTAGGTTGTATAGTT	23	hsa-let-7a-3;mdo-let-7a-3;ptr-let-7a-3;eca-let-7a-2;cfa-let-7a-1;	gggGTGAGGTAGTAGGTTGTATAGTTtgggggtcgctccctctgtctgtgagataactatacagtctactgtctttccc	79
365	gp3	PN-1959-5p-58783	GGGGATGTNGCTCAGTGGAG	20	mmu-mir-1959;	agggccGGGGATGTAGCTCAGTGGAGgagtccttgcccaaaacaggaaaggccctgggttatatccacggcccca	75
366	gp3	PN-429-3p-16007	TAATACTGTCTGGTAATGCCGTAA	24	oan-mir-429;	cggcgtggaggtgcctgctgattggtgtcttaccagacaaagttagatctgactattttcgtcTAATACTGTCTGGTAATGCCGTCAatcacagcggcaagatcttcgtctg	112
367	gp3	PN-551b-5p-5893	GAAATCAAGCGTGGGTGAGACCT	23	hsa-mir-551b;mmu-mir-551b;rno-mir-551b;mml-mir-551b;ptr-mir-551b;bta-mir-551b;eca-mir-551b;	gtgctcttgtggcccatGAAATCAAGCTTGGGTGAGACCTggtacagaacaggaaggcgacccatacttggtttcagtggctgcaagaatggctctat	98
368	gp3	PN-7-5p-18300	TGGAAGACTAGTGATTTTGTTGTTT	25	ssc-mir-7;hsa-mir-7-3;mmu-mir-7a-1;mmu-mir-7a-2;oan-mir-7-1;bta-mir-7-2;ptr-mir-7-1;mml-mir-7-1;sla-mir-7;eca-mir-7-3;rno-mir-7a-1;mdo-mir-7;cfa-mir-7-1;mml-mir-7-3;ppy-mir-7-3;ggo-mir-7-3;eca-mir-7-2;cfa-mir-7-3;bta-mir-7;ppy-mir-7-2;mml-mir-7-2;ggo-mir-	gcctgtagaatatatagaagatttcagtggacgttggtctagttctgtgTGGAAGACTAGTGATTTTGTTGTTTgtagataactaaatcgacaacaaatcgcagtctgccatatggcacagaccatgcctctacaggac	139
369	gp3	PN-380-3p-267	TATGTAATATGGTCCACGTCT	21	eca-mir-380;mml-mir-380;cfa-mir-380;	aagacggttgaccatagagcatgcgctgtctctaggtcgTATGTAATATGGTCCACGTCTt	61
370	gp3	PN-301a-3p-20657	CAGTGCAATAGTATTGTCAAAGCAT	25	hsa-mir-301a;mmu-mir-301a;oan-mir-301;mdo-mir-301;cfa-mir-301a;rno-mir-301a;	tattatggtgtgttttacgctttctgctaacgaatGCTCTGACTTTATTGCACTACTgttctttacagctagcagtgcaatagtattgtcaaagcatctgaaagcagaatacacagcagta	121
371	gp3	PN-299-5p-13746	TGGTTTACCGTCCCACATACAT	22	ssc-mir-299;ptr-mir-299;ppy-mir-299;cfa-mir-299;bta-mir-299;	cggtacttgaagaaatggtttaccgtcccacatacattttgcatatgTATGTGGGACGGTAAACCGCTTcttggtatcc	79
372	gp3	PN-1197-3p-3514	TAGGACACATGGTCTACTTCT	21	hsa-mir-1197;mmu-mir-1197;eca-mir-1197;ppy-mir-1197;bta-mir-1197;ptr-mir-1197;	gggagagaggctgggtcagcgtcacttcatggtatttgaagatgcggttgaccatgctgtgtacgctttatttatgacgTAGGACACATGGTCTACTTCTcctcaatatcacatctcgcc	120
373	gp3	PN-543-3p-264	AAACATTCGCGGTGCACTTCTT	22	hsa-mir-543;mmu-mir-543;bta-mir-543;mml-mir-543;rno-mir-543;ptr-mir-543;eca-mir-543;cfa-mir-543;	ggtgcttaaggagaagttgcccgtgtctttttcgctttatatgtgacgAAACATTCGCGGTGCACTTCTTtttcagtatc	80
374	gp3	PN-382-5p-139	GAAGTTGTTCGTGGTGGATTCG	22	mmu-mir-382;rno-mir-382;cfa-mir-382;	ggtacttgaagaGAAGTTGTTCGTGGTGGATTCGctttacttgtgacgaatcattcacggacaacacttttttcagtacc	80
375	gp3	PN-1357-5p-50913	AGATTATGAGATCTGAGGGCT	21	oan-mir-1357;	gtcccagtgaatggcaAGATTATGAGATCTGAGGGCCctcccccgggggcgccgagtgctccttagccttcctcgggtc	79
376	gp3	PN-25-3p-43	CATTGCACTTGTCTCGGTCTGA	22	bta-mir-25;rno-mir-25;mdo-mir-25;cfa-mir-25;	ggccagtgttgagaggcggagacttgggcaattgctggacgctgccccgggCATTGCACTTGTCTCGGTCTGAcagtgccggcc	84
377	gp3	PN-539-5p-31092	GGAGAAATTATCCTTGGTGTGT	22	hsa-mir-539;mmu-mir-539;bta-mir-539;ptr-mir-539;cfa-mir-539;rno-mir-539;	atacttgaggagaaattatccttggtgtgttcgctttatttgggatgaATCATACAAGGACAATTTCTTTctgagtat	78
378	gp3	PN-485-3p-375	GTCATACACGGCTCTCCTCTCT	22	hsa-mir-485;rno-mir-485;bta-mir-485;cfa-mir-485;	gatacttggagagaggctggccgtgatgaattcgattcatctaaacgaGTCATACACGGCTCTCCTCTCTtctagtgtc	79
379	gp3	PN-532-5p-138	CATGCCTTGAGTGTAGGACCGT	22	ppy-mir-532;mml-mir-532;eca-mir-532;bta-mir-532;cfa-mir-532;	cgacttgctttctctcctcCATGCCTTGAGTGTAGGACCGTtggcatcttaattaccctcccacacccaaggcttgcagaagagcgagcct	91
380	gp3	PN-495-3p-530	AAACAAACATGGTGCACTTCTT	22	hsa-mir-495;mmu-mir-495;eca-mir-495;ptr-mir-495;ppy-mir-495;bta-mir-495;rno-mir-495;cfa-mir-495;	tggtccctgaaaagaagttgcccatgttattttcgcttgatatgtgacgAAACAAACATGGTGCACTTCTTtttcggtatca	82
381	gp3	PN-195-5p-30300	TAGCAGCACAGAAATATTGGCAT	23	mmu-mir-195;rno-mir-195;mml-mir-195;ggo-mir-195;cfa-mir-195;	acacccaactctcctggctcTAGCAGCACAGAAATATTGGCATggggaagtgagtctgccaatattggctgtgctgctccaggcagggtggtga	94
382	gp3	PN-1274b-5p-24235	AGGTCCCTGTTCGGGCACCA	20	ppy-mir-1274b;	ttcttcactcACGTCCCTGTTCGGGCACCAattgtggctgtcggttcgggactgaatgaagaagga	66
383	gp3	PN-590-3p-56007	TAATTTTATGTATAAGCTAGT	21	mmu-mir-590;ppy-mir-590;ptr-mir-590;cfa-mir-590;	tagccagtcagaaatgagcttattcataaaagtgcagtatggtggagtcaatctGTAATTTTATGTATAAGCTAGTctctgattgaaacgtgcagca	97
384	gp3	PN-199c-3p-271	ACAGTAGTCTGCACATTGGCT	21	bta-mir-199c;	atcagtggttcttacggtgtgtttgctactattgaaacgtcagtgtACAGTAGTCTGCACATTGGCTtcttgtgat	76
385	gp3	PN-541-3p-44064	TGGTGGGCACAGAATCCGGCCTTT	24	bta-mir-541;	acgtcagggAAAGGATTCTGCTGTCGGTCCCACTccaaagttcaaaaaatgggtggtgggcacagaatccggcctctgcttgtg	84
386	gp3	PN-203-3p-308	GTGAAATGTTTAGGACCACTAG	22	hsa-mir-203;ppy-mir-203;ptr-mir-203;mml-mir-203;cfa-mir-203;rno-mir-203;mdo-mir-203;	gtgttggggactcgcgcgctgggtccagtggttcttaacagttcaacagttctgtagcgcaattGTGAAATGTTTAGGACCACTAGacccggcgggcgcggcgacagcga	110
387	gp3	PN-15a-5p-24695	TAGCAGCACATAATGGTTTGTGA	23	oan-mir-15a;	gaagacaccttggggtaaagTAGCAGCACATAATGGTTTGTGAgttttgaaatacaggccatattgtgctgcctcaaaaatacaaggatctgatcttc	98
388	gp3	PN-501-3p-39962	ATGCACCTGGGCAAGGATT	19	ssc-mir-500;hsa-mir-502;hsa-mir-500;bta-mir-502a-2;ppy-mir-502;ppy-mir-501;cfa-mir-502;bta-mir-502a-1;cfa-mir-500;	ctgctctgttcccctgtatccaatcttaatgcccagatgcaggtactgtctcagtgcaATGCACCTGGGCAAGGATTcacagaagataag	90
389	gp3	PN-25-3p-13660	CATTGCACTTGTCTCGG	17	ptr-mir-25;	ggccagtgttgagAGGCGGAGACTTGGGCAATTGCTggacgctgccctgggcattgcacttgtctcggctgagacgcgcccgcc	84
390	gp3	PN-1193-5p-10059	GATGGTAGACCGGTGACGTGCA	22	hsa-mir-1193;	gtagctgagggGATGGTAGACCGGTGACGTGCActtcatttacgatgtaggtcacccgtttgactatccaccagcgcc	78
391	gp3	PN-92a-3p-3446	TATTGCACTTGTCCCGGCCTGAA	23	rno-mir-92a-2;ptr-mir-92-2;	tgcccattcatccacaggtggggattagtgccattacttgtgttagataaaaagTATTGCACTTGTCCCGGCCTGAGgaagaaaagagggtt	92
392	gp3	PN-369-3p-1010	AATAATACATGGTTGATCTTT	21	ssc-mir-369;mmu-mir-369;mmu-mir-369;mmu-mir-369;rno-mir-369;	ttgaagggagatcgaccgtgttatattcgctttatggtacttgaagggagatcgaccgtgttatattcgcttggctgacttcgAATAATACATGGTTGATCTTTtctcagtatctgacttcgaataatacatggttgatcttttctcag	149
393	gp3	PN-875-5p-9827	TATACCTCAGTTTTATCAGGTG	22	hsa-mir-875;bta-mir-875;cfa-mir-875;ppy-mir-875;ptr-mir-875;mml-mir-875;rno-mir-875;	ttagtgggacTATACCTCAGTTTTATCAGGTGttatttaaaatcacctggaaatactgaggttgtgtttcactgaac	77
394	gp3	PN-362-3p-16716	AACACACCTATTCAAGGATTCA	22	mmu-mir-362;cfa-mir-362;mml-mir-362;eca-mir-362;bta-mir-362;	gAATCCTTGGAACCTAGGTGTGAGTgctatttcggtgcaacacacctattcaaggattcaaagaggct	68
395	gp3	PN-660-5p-1115	TACCCATTGCATATCGGAGTTG	22	hsa-mir-660;eca-mir-660;ptr-mir-660;mml-mir-660;cfa-mir-660;	ctgctccttctcctgTACCCATTGCATATCGGAGTTGtgaattctgaaagcacctcctgtgtgcatggattacaggagggcgagccttgtcatcatg	97
396	gp3	PN-720-5p-9742	TCTCGCTGGGGCCTCCA	17	mmu-mir-720;	ctggagccccagaatgaagatgcagctttagaatttgggtggtctaTCTCGCTGGGGCCTCCAg	64
397	gp3	PN-652-3p-1849	AATGGCGCCACTAGGGTTGTGT	22	hsa-mir-652;mmu-mir-652;ptr-mir-652;mml-mir-652;ppy-mir-652;rno-mir-652;cfa-mir-652;	acgaatggctatgcactgcacaaccctaggagagggtgccattcacatagactataattgAATGGCGCCACTAGGGTTGTGCagtgcacaacctacac	98
398	gp3	PN-369-5p-3770	AGATCGACCGTGTTATATTCG	21	ssc-mir-369;mmu-mir-369;mmu-mir-369;mmu-mir-369;rno-mir-369;	ttgaagggagatcgaccgtgttatattcgctttatggtacttgaagggagatcgaccgtgttatattcgcttggctgacttcgAATAATACATGGTTGATCTTTtctcagtatctgacttcgaataatacatggttgatcttttctcag	149
399	gp3	PN-200c-3p-193	TAATACTGCCGGGTAATGATGGA	23	hsa-mir-200c;mmu-mir-200c;bta-mir-200c;ggo-mir-200c;eca-mir-200c;cfa-mir-200c;mdo-mir-200c;	ccctcgtcttacccagcagtgtttgggtgctggttgggagtctcTAATACTGCCGGGTAATGATGGAgg	69
400	gp3	PN-151-5p-5539	TCGAGGAGCTCACAGTCTAGTA	22	hsa-mir-151;mmu-mir-151;rno-mir-151;eca-mir-151;cfa-mir-151;	agcgctttcctgcccTCGAGGAGCTCACAGTCTAGTAtgtctcctccctactagactgaggctccttgaggacagggatcgtcatactcacctcccg	97
401	gp3	PN-411-3p-3887	TATGTAACACGGTCCACTAAC	21	hsa-mir-411;ptr-mir-411;mml-mir-411;rno-mir-411;cfa-mir-411;	tggtacttggagagaTAGTAGACCGTATAGCGTACGctttatctgtgacgtatgtaacacggtccactaaccctcagtatcaaatccatccccgag	96
402	gp3	PN-26-5p-97	TTCAAGTAATCCAGGATAGGCT	22	ssc-mir-26a;mmu-mir-26a-1;mmu-mir-26a-2;bta-mir-26a-1;rno-mir-26a;eca-mir-26a-2;mne-mir-26a;cfa-mir-26a-1;mdo-mir-26-3;ptr-mir-26a-2;cfa-mir-26a-2;mdo-mir-26-1;mdo-mir-26-2;	aaggccgtggcctcgTTCAAGTAATCCAGGATAGGCTgtgcaggtcccaaggggcctattctcggttacttgcacgcggacgcgggcctg	90
403	gp3	PN-1261-5p-12486	TGGATAAGGCATTGGCTT	18	ppy-mir-1261;	tgctgTGGATAAGGCTTTGGCTTatggggatattgtggttgatctgttctatccagatgactgaaactttctccatagcagc	82
404	gp3	PN-181c-5p-27101	AACATTCATTACTGTCGGTGGGGT	24	oan-mir-181c;	tgttgaaaagtcacaatcAACATTCATTACTGTCGGTGGGTTgtgataaatgaaaaaaactcaccgccagatgaatgccactgtggctaggcatg	95
405	gp3	PN-875-3p-15533	CCTGGGAATACTGAGGTTGTGT	22	hsa-mir-875;bta-mir-875;cfa-mir-875;ppy-mir-875;ptr-mir-875;mml-mir-875;rno-mir-875;	ttagtgggacTATACCTCAGTTTTATCAGGTGttatttaaaatcacctggaaatactgaggttgtgtttcactgaac	77
406	gp3	PN-429-3p-6578	TAATACTGTCTGGTAATGCCGTT	23	mmu-mir-429;cfa-mir-429;bta-mir-429;rno-mir-429;mdo-mir-429;	agcctgctgatgggcgtcttaccagacacggttagatctgggttctggtgtcTAATACTGTCTGGTAATGCCGTTcatccatggc	85
407	gp3	PN-193b-5p-4411	CGGGGTTTTGAGGGCGAGATGA	22	mmu-mir-193b;oan-mir-193;bta-mir-193b;eca-mir-193b;	ggttgtgattccagagtcggggttttgagggcgagatgagtttgtgttttatccAACTGGCCCACAAAGTCCCGCTtttggtggtcactttgatc	95
408	gp3	PN-375-3p-3473	TTTGTTCGTTCGGCTCGCGTGA	22	hsa-mir-375;rno-mir-375;cfa-mir-375;ptr-mir-375;mdo-mir-375;	tccggccccgcgacgagcccctcgcacaaaccggacctgagcgtTTTGTTCGTTCGGCTCGCGTGAggcaggggc	75
409	gp3	PN-2478-3p-31772	GTATCCCACTCCTGACACCA	20	bta-mir-2478;	gttgggggtcggtggtgagcaagcagagactacataggttgccttGTATCCCACTTCTGACACCAtgtattgtcaac	77
410	gp3	PN-299-3p-365	TATGTGGGACGGTAAACCGCTT	22	ssc-mir-299;ptr-mir-299;ppy-mir-299;cfa-mir-299;bta-mir-299;	cggtacttgaagaaatggtttaccgtcccacatacattttgcatatgTATGTGGGACGGTAAACCGCTTcttggtatcc	79
411	gp3	PN-487b-3p-443	AATCGTACAGGGTCATCCACTT	22	hsa-mir-487b;mmu-mir-487b;bta-mir-487b;ptr-mir-487b;mml-mir-487b;eca-mir-487b;rno-mir-487b;cfa-mir-487b;	ttggtacttggagagtggttatccctgtcctgttcgttttactcatgtcgAATCGTACAGGGTCATCCACTTtttcagtatcaa	84
412	gp3	PN-376d-3p-9586	ATCATAGAGGAAAATCCACAT	21	bta-mir-376d;	ggtatttaaaaggtagattttccttctatgattacgggtttggtgattaATCATAGAGGAAAATCCACATtttcggtatcaa	82
413	gp3	PN-323b-5p-58192	AGGTTGTCCGTGGTGAGTTCGCA	23	bta-mir-453;ppy-mir-453;ptr-mir-453;mml-mir-453;	gcgggaacgccaccagcagcactgcctcacggtacttggagggAGGTTGTCCGTGGTGAGTTCGCAttatttaatgatgc	80
414	gp3	PN-1247-5p-2591	ACCCGTCCCGTGCGTCCCCGGA	22	hsa-mir-1247;ptr-mir-1247;	ccgcttgcctcgcccagcgcagccccggccgctgggcgcACCCGTCCCGTTCGTCCCCGGAcgttgctctctaccccgggaacgtcgagactggagcgcccgaactgagccaccttcgcggaccccgagagcggcg	136
415	gp3	PN-181b-5p-4329	AACATTCATTGTTGTCGGTGGGTTTA	26	oan-mir-181b;	tgcagagtttaacaaaggtcccaatgAACATTCATTGCTGTCGGTGGGTTTAactctgaggacaagctcactgaacaatgaatggaactgtggctcaccttaggcaacca	110
416	gp3	PN-494-5p-15099	AGGTTGTCCGTGTTGTCTTCTC	22	hsa-mir-494;mmu-mir-494;bta-mir-494;rno-mir-494;ptr-mir-494;mml-mir-494;	tcgatacttgaaggagaggttatccgtgttgtcttctctttatttatgaTGAAACATACACGGGAAACCTCTtttttagtatcaa	85
417	gp3	PN-100-5p-58610	AACCCGTAGATCCGAACTTGTGGA	24	hsa-mir-100;age-mir-100;sla-mir-100;mml-mir-100;	cctgttgccacaAACCCGTAGATCCGAACTTGTGGTgttagtctgcacaagcttgtgtctataggtatgtgtctgttagg	80
418	gp3	PN-1385-3p-36413	GGGAGCCCGGCGGGCG	16	oan-mir-1385;	ccgcgaggcctaccgcgtccacctgaggggacccgtcctgtgccgcGGGAGCCCgGGCGGGCGgggaggcctcgtgg	77
419	gp3	PN-377-5p-6676	AGAGGTTGCCCTTGGTGAATTC	22	mmu-mir-377;rno-mir-377;ptr-mir-377;	cttgagcAGAGGTTGCCCTTGGTGAATTCgctttattgatgttgaatcacacaaaggcaacttttggttgag	72
420	gp3	PN-1842-5p-9566	TTGGCTCTGCGAGGTCGGCTCA	22	cfa-mir-1842;	TGGCTCTGCGAGGTCAGCTCAaggtgggtctggatattgagcaggcctgtcagggcgttg	60
421	gp3	PN-410-3p-4677	AATATAACACAGATGGCCTGT	21	hsa-mir-410;mmu-mir-410;bta-mir-410;rno-mir-410;mml-mir-410;eca-mir-410;ptr-mir-410;cfa-mir-410;	gggtacttgaggagaggttgtctgtgatgagttcgctttattaatgacgAATATAACACAGATGGCCTGTtttcagtacca	81
422	gp3	PN-323-5p-6736	AGGTGGTCCGTGGCGCGTTCG	21	ssc-mir-323;hsa-mir-323;mmu-mir-323;ptr-mir-323;cfa-mir-323;	ttggtacttggagagaggtggtccgtggcgcgttcgctttatttatggcGCACATTACACGGTCGACCTCTttgcggtatctaatc	86
423	gp3	PN-141-3p-21462	TAACACTGTCTGGTAAAGATGT	22	mmu-mir-141;ggo-mir-141;ptr-mir-141-1;ppy-mir-141;mml-mir-141;ppa-mir-141;bta-mir-141;cfa-mir-141;eca-mir-141;rno-mir-141;mdo-mir-141;	cggccggccctgggtccatcttccagtacagtgttggatggtctaattgtgaagctccTAACACTGTCTGGTAAAGATGGcccccgggtgggttc	95
424	gp3	PN-1271-5p-24855	CTTGGCACNTAGTAAGCACTC	21	cfa-mir-1271;	CTTGGCACCTAGTAAGCACTCagtaaatacttgttgagtgcctgctatgtgccaggca	58
425	gp3	PN-382-3p-1007	AATCATTCACGGACAACACTTT	22	mmu-mir-382;rno-mir-382;cfa-mir-382;	ggtacttgaagaGAAGTTGTTCGTGGTGGATTCGctttacttgtgacgaatcattcacggacaacacttttttcagtacc	80
426	gp3	PN-409-5p-873	AGGTTACCCGAGCAACTTTGCAT	23	hsa-mir-409;bta-mir-409;	tggtacgcggggagaggttacccgagcaactttgcatctggacgacGAATGTTGCTCGGTGAACCCCTtttcggtatca	79
427	gp3	PN-381-5p-15017	AGCGAGGTTGCCCTTTGTATATT	23	hsa-mir-381;bta-mir-381;cfa-mir-381;ptr-mir-381;	tactcagagcgaggttgccctttgtatattcggttttttgatgtagaaTATACAAGGGCAAGCTCTCTGTgagta	75
428	gp3	PN-106b-5p-439	TAAAGTGCTGACAGTGCAGATA	22	hsa-mir-106b;mml-mir-106b;lla-mir-106b;bta-mir-106b;eca-mir-106b;cfa-mir-106b;	cctgccggggcTAAAGTGCTGACAGTGCAGATAgtggtcctctccgtgctaccgcactgtgggtacttgctgctccagcagg	82
429	gp3	PN-381-3p-1991	TATACAAGGACAAGCTCTCTGT	22	hsa-mir-381;bta-mir-381;cfa-mir-381;ptr-mir-381;	tactcagagcgaggttgccctttgtatattcggttttttgatgtagaaTATACAAGGGCAAGCTCTCTGTgagta	75
430	gp3	PN-300-3p-13997	TATACAAGGACAAGCTCTCT	20	cfa-mir-300;	gctacttgaagagaggttatccttcgtgtgtttgtatgattgtaatgaaTATGCAAGGACAAGCTCTCTccgaggagc	78
431	gp3	PN-200b-3p-161	TAATACTGCCTGGTAATGATGA	22	oan-mir-200b;mdo-mir-200b;eca-mir-200b;rno-mir-200b;bta-mir-200b;	tctggattcagggccgccactaccatcttactgggcagcattggatgagttctgtgtttcTAATACTGCCTGGTAATGATGAtggccgcggcccatacgcaacaacaga	109
432	gp3	PN-320c-3p-599	AAAAGCTGGGTTGAGAGGGCAT	22	ptr-mir-320b-2;ptr-mir-320c-1;ptr-mir-320d-1;ptr-mir-320c-2;ptr-mir-320b-1;	tgttattttttgtcttctacctaagaattctgtctcttaggctttctcttcccagatttcccaaagttgggAAAAGCTGGGTTGAGAGGGCAAaaggaaaaaaaaagaattctgtctctgacataattagataggga	137
433	gp3	PN-656-3p-7207	AATATTATACAGTCAACCTCT	21	hsa-mir-656;bta-mir-656;ptr-mir-656;mml-mir-656;eca-mir-656;	ctgaaataggttgcctgtgaggtgttcacttttctaagcgatgAATATTATACAGTCAACCTCTttccgatatcgaatc	79
434	gp3	PN-1261-5p-3406	ATGGATAAGGCATTGGCTT	19	hsa-mir-1261;	tgctATGGATAAGGCTTTGGCTTatggggatattgtggttgatctgttctatccagatgactgaaactttctccatagcagc	82
435	gp3	PN-329a-3p-1371	AACACACCTGGTTAACCTCTTT	22	hsa-mir-329-2;hsa-mir-329-1;ppy-mir-329-2;mml-mir-329-1;ptr-mir-329-2;ptr-mir-329-1;cfa-mir-329b;mml-mir-329-2;	gtggtacctgaagagaggttttctgggtttctgtttctttattgaggacgaAACACACCTGGTTAACCTCTTTtccagtatcaa	84
436	gp3	PN-323-3p-201	GCACATTACACGGTCGACCTCT	22	ssc-mir-323;hsa-mir-323;mmu-mir-323;ptr-mir-323;cfa-mir-323;	ttggtacttggagagaggtggtccgtggcgcgttcgctttatttatggcGCACATTACACGGTCGACCTCTttgcggtatctaatc	86
437	gp3	PN-656-5p-29663	AGGTTGCCTGTGAGGTGTTCA	21	hsa-mir-656;bta-mir-656;ptr-mir-656;mml-mir-656;eca-mir-656;	ctgaaataggttgcctgtgaggtgttcacttttctaagcgatgAATATTATACAGTCAACCTCTttccgatatcgaatc	79
438	gp3	PN-1842-3p-46163	AGCAGGCCTGTCAGGGCGTTG	21	cfa-mir-1842;	TGGCTCTGCGAGGTCAGCTCAaggtgggtctggatattgagcaggcctgtcagggcgttg	60
439	gp3	PN-376c-5p-43489	GTGGATATTCCTTCTATGTTT	21	hsa-mir-376b;ptr-mir-376b;ppy-mir-376b;cfa-mir-376b;bta-mir-376b;eca-mir-376b;	cagtccttctttggtatttaaaacgtggatattccttctatgtttacgtgattcctggttaATCATAGAGGAAAATCCATGTtttcagtatcaaatgctg	100
440	gp3	PN-138b-3p-30491	GCTATTTCACGACACCAGGGT	21	cfa-mir-138b;	agctggtgttgtgaatcatgccgacgagcagcgcatcctcttacccgGCTATTTCACGACACCAGGGTt	69
441	gp3	PN-410-5p-17791	AGGCTGTCTGTGATGAGTTCG	21	hsa-mir-410;mmu-mir-410;bta-mir-410;rno-mir-410;mml-mir-410;eca-mir-410;ptr-mir-410;cfa-mir-410;	gggtacttgaggagaggttgtctgtgatgagttcgctttattaatgacgAATATAACACAGATGGCCTGTtttcagtacca	81
442	gp3	PN-323b-3p-1142	CCCAATACACGGTCGATCTCT	21	hsa-mir-323b;	tggtactcggagggaggttgtccgtggtgagttcgcattatttaatgatgCCCAATACACGGTCGACCTCTtttcggtatca	82
443	gp3	PN-151-3p-705	CTAGACTGAAGCTCCTTGAGGA	22	ssc-mir-151;ptr-mir-151;bta-mir-151;	tttcctgccctcgaggagctcacagtctagtatgtctcatcccctaCTAGACTGAAGCTCCTTGAGGAcagggatggtcatactcacct	89
444	gp3	PN-551b-3p-28603	GCGACCCATACTTGGTTTCAGT	22	hsa-mir-551b;mmu-mir-551b;rno-mir-551b;mml-mir-551b;ptr-mir-551b;bta-mir-551b;eca-mir-551b;	gtgctcttgtggcccatGAAATCAAGCTTGGGTGAGACCTggtacagaacaggaaggcgacccatacttggtttcagtggctgcaagaatggctctat	98
445	gp3	PN-1274a-5p-54245	GTCCCTGTTCAGGCGCCA	18	hsa-mir-1274a;	gatgtccctgtttGTCCCTGTTCAGGCGCCAcctgtggctgtctgccacaagtactatttgagaccatcac	71
446	gp3	PN-590-5p-31984	GAGCTTATTCATAAAAGTACAG	22	eca-mir-590;	caatcagaaacGAGCTTATTCATAAAAGTACAGtataatccagtaaacctgtaattttatgtataagctagtctctgattg	81
447	gp3	PN-93-3p-1604	ACTGCTGAGCTAGCACTTCCCGA	23	hsa-mir-93;mmu-mir-93;	agtcatgggggctcCAAAGTGCTGTTCGTGCAGGTAGtgtaattacctgacctactgctgagctagcacttcccgagcccccaggaca	88
448	gp3	PN-223-3p-48223	GTCAGTTTGTCAAATACCCCA	21	hsa-mir-223;mmu-mir-223;mdo-mir-223;mml-mir-223;sla-mir-223;ppy-mir-223;eca-mir-223;cfa-mir-223;bta-mir-223;rno-mir-223;	tctggcccagatccttcagtgccacactccgtgtatttgacaagctgagttggacactccgtgtcgtagagtGTCAGTTTGTCAAATACCCCAagtgaggcatttgcctag	111
449	gp3	PN-383-5p-1411	AGATCAGAAGGTGATTGTGGCT	22	hsa-mir-383;oan-mir-383;ptr-mir-383;bta-mir-383;mdo-mir-383;cfa-mir-383;	cgcaagagaatctcggagtcacctgctcctcAGATCAGAAGGTGATTGTGGCTttgggtagctactaagcagccacaacactgcctggtcagaaagagcaagtggacaagccttttgtg	119
450	gp4	PC-3p-32678	CGTCGCGCGTCGGGAC	16		gtcccccgccgtccccgccggcgggccgccgcgcgcgcccgcgtgcggcgtgtccCGTCGCGCGTCGGGACcggggtcc	79	chr6	248295	248310	248287	248365
451	gp4	PC-5p-47542	GCAGTAAGTCGGAGTTC	17		agagtgcaGCAGTAAGTCGGAGTTCtgaaaagcagagcataaactgaacagatcatctgaactactggcacaga	74	chr2	57517736	57517752	57517728	57517801
452	gp4	PC-5p-46964	CCCGGGGTGTGGGGAGGG	18		cCCCAGGGTGTGGGGAGGGgccgcctgaggccggcacggcaggtcccagccaccacaccctgctg	65	chr6	43795988	43796005	43795987	43796051
453	gp4	PC-3p-34812	TACAGATTGGGAAGGA	16		caattccttttcaaaatgtactataagtttttgctagtgcaataagacaagtaaatgttaTACAGATTGGGAAGGAagaa	80	chrX	102337811	102337826	102337807	102337886
454	gp4	PC-3p-40586	GATGATTGTTGGACACC	17		gggggtgggggggatgcactgagggtttgggatggacatgcgatcaaattgggttgtGATGATTGTTGGACACCtataaatgtagtaaaatttaatgagtcactaaa	107	chr5	7180836	7180852	7180779	7180885
455	gp4	PC-3p-19163	GTCCCTCGCGGGGGCGCGCCGGGTT	25		cctcccggcgctcccccccgcgggggcgcttccccgccagggggggtGTCCCTCGCGGGGGCGCGCCGGGTTt	73	chr6	251768	251792	251767	251839
456	gp4	PC-3p-39857	CTCCCGGGTTTCGGCACCA	19		cggttgcacacccaggagttttgggctccgccgacctgcttcccgttccctggccattccCTCCTGGGTTTCGGCACCAaa	81	chr1	273707762	273707780	273707760	273707840
457	gp4	PC-5p-35585	TATAGATCAAGTTGGGA	17		acttaacttgctagtattttaattgggattgtattaaatcTATAGATCAAGTTGGGA	57	chr2	108831159	108831175	108831119	108831175
458	gp4	PC-5p-57993	CAGGGATCAGATCGGA	16		atatgcagttcccgggcCAGGGATCAGATCGGAgccacagttgtaacctataccccagctgcaccgatgctggatccttaacccactgtacag	93	chrX	42555100	42555115	42555083	42555175
459	gp4	PC-5p-48980	GAGGCGCCGCCGCCACCC	18		gccggcccagggctgggGGAGGAGGCGCCGCCGCCgcccggctcggccacctgcgccgccgccgccgccgccgcccggccctgctccagg	90	chr5	21062553	21062570	21062502	21062591
460	gp4	PC-3p-40847	GGGGATTGTAGCAGAGGCA	19		ctgctgacttaaccctgaaatttggtataacctcatgtgctGGGGATTGTAGCAGAGGCAgggtaagaaagaga	74	chr10	65376647	65376665	65376633	65376706
461	gp4	PC-3p-38954	TACTAGTTGGATTCCT	16		cgaggccaggaatccaactcacatcctcatggaTACTAGTTGGATTCCTtaccact	56	chr5	90769027	90769042	90768994	90769049
462	gp4	PC-3p-19139	ATATAGCAAAGTGACC	16		tataatggttttatttgtttccatgatagctggtttacagtgttctgtcagttttctacgATATAGCAAAGTGACCtagtcacacatacagatatacattctt	103	chr10	23414124	23414139	23414097	23414199
463	gp4	PC-5p-33511	TATAGATCAGAGGTTCC	17		acccgccggcTATAGATCAGAGGTTCCcaagacctgctcctttggttctgttcgttagtgagg	63	chr17	38655307	38655323	38655297	38655359
464	gp4	PC-3p-174	ATGCGGAACCTGCGGATACGG	21		atatacggtcggccctccatgtccgcgggttccctatcccgggttggttgagttcgcggATGCGGAACCTGCGGATACGGagggctgattgtactc	96	chr5	4391290	4391310	4391274	4391369
465	gp4	PC-5p-43899	GAGTAAGGGCAGGGAC	16		cactGAGTAAGGGCAGGGACcgaacccgcaacctcatggttcctagtcagattcatta	58	chr10	40302807	40302822	40302803	40302860
466	gp4	PC-3p-57569	TGTGACTGTGGCGTACGCCGGCAT	24		gatccagcgttgctgtgagctgtggtgtaggtcgcagacgcagctcagatctggcattgcTGTGACTGTGGCGTACGCCGGCAGctacagctccaactggaccc	104	chr6	114182815	114182838	114182755	114182858
467	gp4	PC-3p-32533	CAGGGAGAAGTCGGATGGGG	20		tgccagctctctttgggctccttgctctggggacactcgagcagcccCAGGGAGAAGTCGCATGGGGagctgagg	75	chr18	2330878	2330897	2330870	2330944
468	gp4	PC-5p-58510	CACTTGGGTCCGAGGGC	17		ctcgCACTTGGGTCCGAGGGCctgcggggtcaaccggctgtcccgggcgactcctgcccgcatccgagtgccca	74	chr1	294459183	294459199	294459130	294459203
469	gp4	PC-3p-54511	CTGAGATTGTAGGAGGAGA	19		cggctccccaagccccagccatgtccgcctcaccgagctggCTGAGGTTGTAGGAGGAGAca	62	chr1	170450091	170450109	170450089	170450150
470	gp4	PC-3p-15885	AACCTTGCTGGAGATCTTGGA	21		acccggggggctctggatctccaggaaggctgggtgttggagAACCTTGCTGGAGATCTTGGAagtgaacccccgtga	78	chr10	45978949	45978969	45978934	45979011
471	gp4	PC-3p-46977	GCCTCAGGTCGTTGGGT	17		tgagtggagccttgagaactGCCTCAGGTCGTTGGGTgggggatgggatttggcctgcattcctcctcagaccaagggcaagagtttgaggaccacc	97	chr1	14603364	14603380	14603344	14603440
472	gp4	PC-5p-39068	CATTGGGGCTGAGGTTGGT	19		ataggcaagcgctgggatcctgagccaagccgCATTGGGGCTGAGGTTTGTtccccgagctcagtttccctttgcagaaggcagctcctggaagcccgttttgtgccatt	110	chr2	86646975	86646993	86646943	86647052
473	gp4	PC-5p-32379	CATAGGGCCAAGGAGGGT	18		aatgcggcttggctcaggatcccagggcttgcctatttctcacctggccctaggctcccCATAGGGCCAAGGAGGGTCtgagctgcctctgcctccgtgggcactgctgcttg	113	chr2	86665173	86665190	86665137	86665249
474	gp4	PC-5p-46978	CGGCATATGTAGGTTC	16		ccaCGGCATATGTAGGTTCcaaggcttggggtcgaattggagctacagctgctggcc	57	chr17	3109330	3109345	3109327	3109383
475	gp4	PC-5p-41806	TATTAATGACGGCCAT	16		ttacagaatTATTAATGACGGCCATtctgaccagggtgaggtggtccctcactgtagttttgatt	65	chr6	44294320	44294335	44294280	44294344
476	gp4	PC-3p-49234	GTTAAGGATCGGGCGT	16		tgaggttgcgtgttcgatccctggcctcgctcagtggGTTAAGGATCGGGCGTtgccata	60	chr10	9307435	9307450	9307428	9307487
477	gp4	PC-5p-42342	GCTACAACACGGGACTCGGGCGT	23		agacctcggGCTACAACACGGGACTCGGGCGCtgctctgacccctcgtgtcttgtgttgcagccggagggac	72	chr6	83322598	83322620	83322558	83322629
478	gp4	PC-3p-56416	AGTTTTGATCGTGAAGGGA	19		aatggcttttattatgttaagttatgttccctctatatccactttgataagAGTTTTGATCATGAAGGGAtgttggactttgtgaaatgccttt	94	chr4	96112337	96112355	96112286	96112379
479	gp4	PC-5p-28606	CACACTGCCGGCCTCTGAG	19		cCACAGTGCCGGCCTCTGAGaccacctctctgaccacctccaggggctccggggcgcctggcc	63	chr6	566723	566741	566680	566742
480	gp4	PC-5p-47796	GCCCCGTCGTCCTCTCC	17		gtggctcgggggGCCCCGTCGTCCTCTCCctccctcctctccggagggggaggggggggcccgcggcgggcccaccgccccgagtgtt	88	chr6	251970	251986	251911	251998
481	gp4	PC-5p-46602	GAGGTGGTGAGCGAGCAT	18		tcttcccgcactcgcctggggtcgcagctggtggtgtgGAGGTGGTGAGCGAGCATggttcgggccgcctcgctcaggagcgtttcccccaggcgtcaggccctggaggg	110	chr6	244748	244765	244710	244819
482	gp4	PC-3p-5588	CAGAGTTCTACAGACGATC	19		ggaggaaggcttttatttagaaagtcagagactgactatatCAGAGTTCTACAGACTATCtgaatatgccccagg	75	chr8	14239514	14239532	14239499	14239573
483	gp4	PC-3p-28844	GGTTAAGGATCGGGTGT	17		tgatccctggcctcaatcagtgGGTTAAGGATCGGGTGTtgctgtgagctgtggtgtaggctggaagctgcagctctgattcagcccctagcctgggaa	99	chr10	45589657	45589673	45589635	45589733
484	gp4	PC-3p-49285	GTGGAAAGATGGACGGATG	19		ctctctcatgaaacaggtccatcacaggttggtcatatctacaatttagactgcagaagtGTGGAAAGATGGATGGATGggtggagggaagg	92	chr13	26038265	26038283	26038205	26038296
485	gp4	PC-3p-53455	CACAGCTCGGATCTCA	16		tggccttactcagcgggttaacgatccggcgttgctgtgagctgtggtgtaggtcacagaCACAGCTCGGATCTCAcactgctgtggctctggctccg	98	chr10	34879954	34879969	34879894	34879991
486	gp4	PC-5p-28165	CATGGTCCCTAGTCGGA	17		gaacccgcaacctCATGGTCCCTAGTCGGAttcgttaaccactgagccatgatgggaac	59	chr18	4751407	4751423	4751378	4751436
487	gp4	PC-5p-44178	TATTGAGTTGGATGAGC	17		TATTGAGTTGGATGAGCtgttcatatatttttgatattaaccccttaccagtcatat	57	chr8	77408691	77408707	77408651	77408707
488	gp4	PC-5p-58824	TAGTAGATCAAAGGAC	16		TAGTAGATCAAAGGACtttcacatgttcttgataaatgtttctgatcaggcatctgagttcttaaatctgacc	73	chr17	42403549	42403564	42403492	42403564
489	gp4	PC-3p-56435	CATGGATACGAGTCGGA	17		tcgaacccgagtcctCATGGATACGAGTCGGAttcgttccccctgtgccatggcgggaactccaggttgtg	71	chr5	7173686	7173702	7173671	7173741
490	gp4	PC-3p-51876	GTTGAGTCGGATGAGT	16		gggccaaagcaggaactcccctttgctcaattttaaattgggttttttgctGTTGAGTCGGATGAGTtacatattttggata	82	chr10	64456479	64456494	64456428	64456509
491	gp4	PC-3p-30694	CATGAGGACGGGGGTT	16		agttcctgtcgtagctcagtggttaacaaacccaactaacatcCATGAGGACGGGGGTTcaatccctggcctcgttcagtgggttaaggatccaccgtagctctaattggaccc	114	chr6	36879464	36879479	36879421	36879534
492	gp4	PC-3p-35409	TAGAGGTCCAGTCGGA	16		ttttgttttgttttgtttttctttttatgtccgcccctgcggcctatggacgatcctggcTAGAGGTCCAGTCGGAgatagagctgaagcctacaccacagcca	104	chr18	206435	206450	206407	206510
493	gp4	PC-5p-24896	ATTAAGGGGTAGAAGCGGA	19		aatttattgttttctATCAAGGGGTAGAAGCGGAtgagtagaaatactcctgctactactattgtgctggagtgcagtagtgc	83	chr2	104176660	104176678	104176611	104176693
494	gp4	PC-5p-43364	AATTTAGAGTCGGGGAGA	18		accatgacagtttttAATTTAGAGTCGGGGAGAgggaggaggccctgccactttctcctgtttttctaagaagcctaatacttgtcataac	91	chr1	44466602	44466619	44466544	44466634
495	gp4	PC-5p-36531	CAGAGAGGGAGGACGAGG	18		GAGAGAGGGAGGACGAGGagccaaatgggttgggtgagaataaactactggggccttcttcccttcaa	68	chr4	103167445	103167462	103167395	103167462
496	gp4	PC-5p-38663	TAGGGGTCGGATCAGA	16		TAGGGGTCGGATCAGAgcaatggctgctggccacagccacgctggatccaagccgtgtctgcgacctaca	70	chr6	52374048	52374063	52373994	52374063
497	gp4	PC-5p-51164	CATAGTTCCCAGTCGGA	17		caacctCATAGTTCCCAGTCGGAttcgttaaccactgcaccacgacgggaactccttgaggaca	64	chr4	86833915	86833931	86833874	86833937
498	gp4	PC-5p-49827	AGAGCTGACTGATGGG	16		gcctggggcttcttAGAGCTGACTGATGGGtggggccagattttcccaactggccacctccagagaaaggcagctgctgaatattcccga	90	chr5	22982989	22983004	22982975	22983064
499	gp4	PC-5p-37380	ATAAAGTCGGAAGAAA	16		tATAAAGTCGGAAGAAAaagatagtcttggattacactcattttttttttttttttttggctttttg	67	chr5	2391999	2392014	2391998	2392064
500	gp4	PC-5p-6028	CAGTAGGTCGGGGATC	16		ccgctCAGTAGGTCGGGGATCctccattgctgtgagctgtggtgtaggtcacagacgcagctccgatcctaagttgctgag	81	chr5	26818972	26818987	26818912	26818992
501	gp4	PC-3p-30961	GCGGCCGAGGTGGGAT	16		gacttcctctcggtccatagacaaggaagctgaggttcagaggcctgaagtgactgaggtGCGGCCGAGGTGGGATtcaag	81	chr6	42646626	42646641	42646566	42646646
502	gp4	PC-3p-36665	TATAGCTCGGATTAGA	16		cgtggcttgggctcggatcccgcattgctgtggctctggtggtgtacgccactggcTATAGCTCGGATTAGAcccctagcctgg	84	chr5	65103496	65103511	65103440	65103523
503	gp4	PC-3p-58149	CAGTAGACAGACTTCACACAACT	23		gaagccacggttccaagtgatatcactactgccttcagttCAGTAGACAGACTTCACACAACTgcagcatc	71	chr2	81155736	81155758	81155696	81155766
504	gp4	PC-5p-53739	TCAGTGAGTCGGGGATC	17		atccgtgggggtgcatgttcaatctctggcctcgcTCAGTGAGTCGGGGATCcagcgtttccatgagc	68	chr1	104112023	104112039	104111988	104112055
505	gp4	PC-5p-45735	AGCAGAGTTGCGCAGC	16		taactcAGCAGAGTTGCGCAGCttgggaaatcattctcgtgggtgcggagctgccagcaggctgggggt	69	chrX	25543487	25543502	25543440	25543508
506	gp4	PC-5p-24478	TAGGGGTCAAGTCGGA	16		gcacccatggccataaggaagttctcaggcTAGGGGTCAAGTCGGAgctatagctgccggctccttacctgattccttaccactgagccacagcgggaac	100	chr5	75061978	75061993	75061948	75062047
507	gp4	PC-3p-26672	AAACGATGATGGAAGGTGCTGAGGA	25		cttcccctttctatctggtcccttctctccccgcttcatggttgacagcaaccccagAAACGATGATGGAAGGTGCCGAGGAaggggtgc	90	chr2	8459157	8459181	8459100	8459189
508	gp4	PC-3p-58754	TATAGTAGGACCTTGT	16		tacctgtgctgTATAGTAGGACCTTGTtgatccaacctaactatatataatagttt	56	chr17	47442336	47442351	47442325	47442380
509	gp4	PC-3p-53154	GGCCTTGATCGGTGGGT	17		aggagttcccgtcatggccagcagaagcaaatccatgaggttgcaggttcgatccctGGCCTTGATCGGTGGGTtaag	78	chr4	80447204	80447220	80447147	80447224
510	gp4	PC-5p-9764	GGCTCTGGCGCAATGGA	17		aaagccttaatcaggggtctcTGCTCTGGCGCAATGGAatcagggtttctgtagctccaggacgcaggtttgatccctggcctggcaca	89	chr5	6714329	6714345	6714308	6714396
511	gp4	PC-5p-41788	TATGTTGTTGGATTCA	16		tttgaTATGTTGTTGGATTCAgatggctaaaattttgttgagaatttttgcatctaaattcatcaaagatattggt	76	chr17	24195611	24195626	24195606	24195681
512	gp4	PC-5p-34181	TAGGGGTCGGATCGGA	16		accTAGGGGTCGGATCGGAgctgtagttgccggcctactccacagccacggcaacgccgggcccctaacc	70	chr6	101113	101128	101110	101179
513	gp4	PC-5p-11488	CACAACTCTGGGAAGTACCATTT	23		tgagtagggccactccatcgCACAACTCTGGGAAGTACCATTTagatatgctatattgtgaatggtgctccagggttgtacagtgtggtagccttgcctt	100	chrX	46896220	46896242	46896200	46896299
514	gp4	PC-5p-26373	AGGTGCGGCCACTTGTT	17		tgcttctgcagtggctgtgcctcgacccctggcctgggaatttccatatgccgcAGGTGCGGCCACTTGTTgaaaaa	77	chr1	4052099	4052115	4052093	4052169
515	gp4	PC-5p-48616	GATTGGTCGGTGGGGA	16		tctGATTGGTCGGTGGGGAggtaacagggcgaggtttcaggaatctcaatcattaaccttctggttccaaccagtccgg	79	chr10	30356704	30356719	30356701	30356779
516	gp4	PC-5p-24688	CAGTGTGTCGGGGATC	16		ccctggccttgttCAGTGTGTCGGGGATCtggtgttgccttgagttgtgacgtagttcccagatgcagcttggatctggctatgg	85	chrX	17592729	17592744	17592673	17592757
517	gp4	PC-5p-53415	CATTTAGGTGGTGGGT	16		tacttCATTTAGGTGGTGGGTtaagttctcaatttgagatttttcttcttttttgaggaaagcctatatttctatgaattt	81	chr17	3806578	3806593	3806518	3806598
518	gp4	PC-5p-51130	GGGATTGAATCTGAAC	16		gttcctgggccaGGGATTGAATCTGAACcacaccagatcttttaacccactgtactaggctg	62	chr8	24515294	24515309	24515282	24515343
519	gp4	PC-3p-49488	CTAGTATCGGTGAGGA	16		gcttggagttctcatcgtggctcagcagtaacaaacctggCTAGTATCGGTGAGGAaccatgt	63	chr10	16492980	16492995	16492973	16493035
520	gp4	PC-3p-41956	CGTATAGATTGAAAGGGA	18		aaaaccttcaatatgctgcctacaagaaactcaccttaggacaaaagataCGTATAGATTGAAAGTGAa	69	chr5	25135893	25135910	25135892	25135960
521	gp4	PC-3p-51289	GCCGGCGGCCGAGGTGG	17		cctttccgccgcggcccgctctccgccgttgccatggttaCCCGGCGGCCGAGGTGGgaggg	62	chr6	119942823	119942839	119942818	119942879
522	gp4	PC-3p-40135	GGTTAAGGATCGGCGT	16		agaacacaactagcatccatgaggacgccggtttgatccctgcccttgctcagtgGGTTAAGGATCGGCGTtgccgtgagctgtggtgtagg	92	chr8	2364041	2364056	2363986	2364077
523	gp4	PC-3p-8280	AACTACTCGGCGTTGCT	17		tgccatgagggtggtagctatttaagatacaggtgaggacttcctgtgtggctcacaacatAACTACTCGGCGTTGCTtct	81	chr2	45189306	45189322	45189303	45189383
524	gp4	PC-3p-2582	CAGTGAGTCGGGGATC	16		tgcagcagaaatgaatcctactagtatccatgaggatatgggtttgatccctggccttgttCAGTGAGTCGGGGATCctgtgttgccatgagctatggtgtaggttgcagatgctgcttg	120	chr6	122666443	122666458	122666400	122666519
525	gp4	PC-3p-12333	GTCGGTCCTCGCGCGTGGCTC	21		cggggtggggtggggtgggggagccaggcgggtggaggctggaccgggGGTCGGTCCTCGCGCGTGGCTCtcgtaccgtgtccccttcccacctgg	96	chr6	252894	252914	252868	252963
526	gp4	PC-3p-48419	TATAGTGAGTCGGAGGATA	19		atattccagtgtcagtatcagatgataaatgaatagaagaaaacaTATAGTGAGTCGGAGGATAacaggcattataggagaaa	83	chr1	269444655	269444673	269444610	269444692
527	gp4	PC-5p-38629	CATAGAGTTGGAATCA	16		ccagaatgtCATAGAGTTGGAATCAtacaagggatagaatttccaaattggcttctttactttgtaatattcatt	75	chr17	10437791	10437806	10437782	10437856
528	gp4	PC-3p-49615	TAATTGTCGGGTGAGA	16		tcctcctttctccatcacacattactagtggtcaagactttcttaTAATTGTCGGGTGAGAtgaaag	67	chr5	78672063	78672078	78672018	78672084
529	gp4	PC-5p-6438	GTAGCAGTAAGTCGGA	16		gaagagtGTAGCAGTAAGTCGGAgtatggaaaagccgatcaagaacccaacggaccatctgaactacgggcacagtcacc	80	chr17	25914795	25914810	25914788	25914867
530	gp4	PC-5p-55329	TAAGTGGGTCGGGGATC	17		cacatcggaaacaaatctgactagtacccatgagtatgtgggttcaatccctggcttcgcTAAGTGGGTCGGGGATCcagtgttgccatgagctctggtgtaggttgcagacatgacttggatcctatgttgc	133	chr1	24047573	24047589	24047513	24047645
531	gp4	PC-5p-55358	AACGAATCGGACTAGGA	17		gttcccgttgtggcacagtggttAACGAATCGGACTAGGAaccatgaggttacgggttcgattcctggccttgctcagtgggtta	85	chr13	40535580	40535596	40535535	40535619
532	gp4	PC-3p-41121	CAGTAGGTCGGAAGAAC	17		atgtcatcttacctattcctggagttaccatgttggaggtcctgctCAGTAGGTCGGAAGAACt	64	chr1	22844090	22844106	22844044	22844107
533	gp4	PC-5p-57824	CAAGGGGTCGAATCGGA	17		aggCAAGGGGTCGAATCGGAcctacagctgctggcctacaccacagccacagcggctcgatacctgaccccctgagc	77	chr1	7127589	7127605	7127586	7127662
534	gp4	PC-5p-48686	CAAGACCAGGGATGGA	16		tacaccacagctcacagcaacaccagatccttaagcccctgagCAAGACCAGGGATGGAacctgcatcctcatggactctagtcgggttggtaacctgctgggcacaatggtaat	115	chr8	101757232	101757247	101757176	101757290
535	gp4	PC-3p-48110	CAGAGATCAGAGGGGAGA	18		ggcttctccctgggctggtatgtgtgagggccgaagggaatttcggactttcagttttCAAAGATCAGAGGGGAGAgttg	80	chr6	91108076	91108093	91108072	91108151
536	gp4	PC-3p-26099	GGTGTAGGTCGGTGGC	16		gtaggttgtagacatggctcggatcccgcgttgctgtgtccacGGTGTAGGTCGGTGGCtacagctccaatttgacacccagcctgggaacctccaaatgctatgggtgcagcccta	117	chr8	96278217	96278232	96278174	96278290
537	gp4	PC-5p-53953	CATGGGAGGAGGTGAGC	17		tttggtgtgccCATGGGAGGAGGTGAGCtcagggtctcttcccatgttactcttcccatgttggccacactctc	74	chr17	40242295	40242311	40242249	40242322
538	gp4	PC-3p-37654	CAGGGCAGAGAACAGGGC	18		accaccctggccctctgtcctcactgactgaaacagaaggaccatgCAGGGCAGAGAACAGGGTtca	67	chrX	70346	70363	70300	70366
539	gp4	PC-3p-49776	CACTGCAGTCGGATTCT	17		ctactgcactggactgggaattggacttggatttatgtagtgaactgagcCACTGCAGTCGGATTCTtaacccactgtgccagagtaggaa	91	chr2	123364148	123364164	123364098	123364188
540	gp4	PC-3p-53970	AGTGGGATTGTTGGGT	16		tacatgtatctttttcaatcaaatttttgtctggataggAGTGGGATTGTTGGGTcatatg	61	chr8	75254570	75254585	75254531	75254591
541	gp4	PC-3p-33106	CATAGGGCCAAGGAGGGTC	19		ttggctcaggatcacagcgcttgcctagttctcacctagccctagcctcccCATAGGGCCAAGGAGGGTCtgggctgcctctggctccgtgggcact	97	chr1	94580371	94580389	94580344	94580440
542	gp4	PC-5p-44827	TAGTGGTCGAATCGGA	16		ccaggcTAGTGGTCGAATCGGAgctgcagctgttggcctcagccacagcaacaccagatctgagcctgcgacccacaccaca	82	chr5	79656905	79656920	79656899	79656980
543	gp4	PC-3p-58735	GTGCAGGAGGATTCCC	16		caaggaatctccatactgttttccatagtggctgcaccagtttacattcccaccaacaGTGCAGGAGGATTCCCtt	76	chr18	3060196	3060211	3060194	3060269
544	gp4	PC-5p-58593	TAATGGATCCTAGTCGGA	18		gaacccacaactTAATGGTTCCTAGTCGGAtttgttaaccactgagccatgatgggaac	59	chrX	63765058	63765075	63765046	63765104
545	gp4	PC-3p-18428	GTTAGATTTAGAGAGTCCGGTA	22		tttgatgatttggtccaatggaggataccggactctctaaatctcaccttagactctgagGTGAGATTTAGAGAGTCCGGTAtcctccctggaaatccatcttc	104	chr2	36112931	36112952	36112871	36112974
546	gp4	PC-5p-32513	AGGGTCCCCGGTAGCTCA	18		aaagggaAGGGTGCCCGGTAGCTCAgggcaccagcttcgagtccgagagactggggtttgagctagcgtccacggcttcctcgc	84	chr6	33619764	33619781	33619705	33619788
547	gp4	PC-5p-54435	CAAGGGGAGTGGGGGT	16		caagggtctggtgggctacagttttatccccCAAGGGGAGTGGGGGTcggaaaagacccgcctcttcctgtctgggagtagtagctcctccttggtatctggt	103	chr6	58807212	58807227	58807181	58807283
548	gp4	PC-3p-40640	AACAGCAGTTGAACATTG	18		cgagcagttttcaatctggccctgcacatttgtgAAAAGCAGTTGAACATTGtaat	56	chr5	85278456	85278473	85278452	85278507
549	gp4	PC-5p-48202	GCAAAGATCAAAGGAC	16		tttagaGCAAAGATCAAAGGACtgtgatggtaccgaaaaagatgtgctttacgtgatccttgatatatcttcagcatctttc	82	chr6	78302454	78302469	78302448	78302529
550	gp4	PC-3p-56768	TAGTATAGTCGGAAGCCA	18		cagtaccatatggttttgatgactgtagctttgTAGTATAGTCGGAAGCCAggtagtc	58	chr6	8136541	8136558	8136534	8136591
551	gp4	PC-5p-55150	TATTAAGTGAAGTCGGAA	18		tagagattatcaTATTAAGTGAAGTCAGAAagagaaagacaaatactgtgtgatatcacttatatgtggaatctaaa	77	chr5	31927282	31927299	31927270	31927346
552	gp4	PC-3p-25529	AGGGCCACGGTGCGGGTCGGG	21		ccaccccggcctcgcctcctcctcccccccttcccggggtgtggggAGGGCCACGGTGCGGGTCGGGgcgg	71	chr6	251652	251672	251648	251718
553	gp4	PC-3p-33750	CACGGCAGCACCAGATC	17		accagatccaagctgcatctgcgacctacaccacaggtCACGGCAGCACCAGATCttta	59	chr8	28387088	28387104	28387050	28387108
554	gp4	PC-5p-41213	CAGTGTCGACCGGATGTCC	19		ctcaCAGTGTCGACCAGATGTCCtgggggactcgtgcccggtaccgagggcctcggggttgacctgctgttcc	73	chr6	5306507	5306525	5306503	5306575
555	gp4	PC-5p-45980	GCAATGCAGGATCGGA	16		GCAATGCAGGATCGGAgccacgtgtgtgacctacaccatagctcatggcgacactggatccc	62	chr6	21825970	21825985	21825924	21825985
556	gp4	PC-3p-40159	GGCCGGGGGACGGACTGGGA	20		ggagagtcggccggggccaggccgcctgaggcgaggggatggcGGCCGGGGGACGGCCTGGGAcccccggccctcacg	78	chr10	61279667	61279686	61279624	61279701
557	gp4	PC-5p-52592	GCAGTAAGTCGGAGTAC	17		gaagagtgtaGCAGTAAGTCGGAGTACggaaaaacgatcaagaacccaacagaccatctgaactacgggcacagtcacc	79	chr13	47686834	47686850	47686824	47686902
558	gp4	PC-5p-42602	TGGGAAAGTTGGACAGC	17		caagtggttTGGGAAAGTTGGACAGCtgcatgtaaatcagtgaagttagaacactcccttacaccataca	70	chr5	51210454	51210470	51210410	51210479
559	gp4	PC-5p-42817	GCGGCATATGTAGGTTC	17		cccGCGGCATATGTAGGTTCcaaggctaggagtcgaatcgaagctgtagctgctggcctgcaccaaagccgcagc	75	chr6	71256628	71256644	71256625	71256699
560	gp4	PC-5p-41107	GAACGCGGCCTGAGTGGT	18		acgagtgggagaagGAACGTGGCCTGAGTGGTacatcatcttttttaggggaaggtgcctgcctgttaggagcatgtgttcctttttgtgct	92	chr5	86895589	86895606	86895529	86895620
561	gp4	PC-3p-53437	GCTGGGAGGAGGAAGACA	18		cctttctccattcccaaaagcctaaaaaggaaaggcataagccttcaatcccatttccagGCTGTGAGGAGGAAGACA	78	chr17	41108902	41108919	41108842	41108919
562	gp4	PC-3p-36835	GAGCAGGGCAGGGACC	16		acaagtgacatttctttgattgggaaggtgtgtttactgctctgtcagatgcatagGAGCAGGGCAGGGACCacgttctgaagtggaaactgag	94	chr17	29719778	29719793	29719722	29719815
563	gp4	PC-3p-40920	TATGATGGAGGATGATA	17		ttagcaatgagatcctgccatgcactgggaactatatctagtcactCATGATGGAGGATGATAatgtgag	70	chr8	87372078	87372094	87372032	87372101
564	gp4	PC-3p-43512	AGTGAAGGCTTATATATCTTGT	22		gtgccctatgtatgggcactagacagggtatataagccttcactggttaaatcaacatacAGTGAAGGCTTATATATCTTGTctagtgcccacacatgggaacatc	106	chr18	13426668	13426689	13426644	13426749
565	gp4	PC-5p-52539	GGCGCGCGGTCGCCCGGGG	19		ggcggggcggGGCGGGCGGTCGCCCGGGGcggcggcggcggcggcggcggccgttggggtgcgaccgtccccgccccttt	80	chr1	106652044	106652062	106652034	106652113
566	gp4	PC-3p-58746	CAAGCCACTGCAGTCGG	17		taacctactgtaccaggctgggagtgaacatgcaccatcgcagtgatcCAAGCCACTGCAGTCGGatt	68	chr1	164621173	164621189	164621125	164621192
567	gp4	PC-5p-9054	AGGGAACCTGGAAAAGCTGAAG	22		aaaggtgttctggagAGGGAACCTGGAAAAGCTGAAGgtgtaatatgaaaacctcagcaattcttggttctcatttttaggacatcaat	89	chrX	76730935	76730956	76730883	76730971
568	gp4	PC-5p-51903	CATGATTCCCAGTCGGA	17		acctCATGATTCCCAGTCGGAttcgttaaccactgcgccacgacaggaactccatgaatt	60	chr4	3736733	3736749	3736694	3736753
569	gp4	PC-3p-55239	CAAATAAAGATCGGGAGGA	19		acttgtgacaattttgtggggtattatctatagtttctatggatacttagagatgaggttCAAATAAAGATCAGGAGGAt	80	chr1	178308617	178308635	178308616	178308695
570	gp4	PC-3p-35429	GTCTTTCGGAGTCGGGC	17		acaagcctggccgaatcgggaaaagatctcagacgGTCTTTCGGAGTCGGGCtgtc	56	chr1	150477131	150477147	150477096	150477151
571	gp4	PC-3p-56517	ACCTGAAGTCGGACGGC	17		ccccagccccgctccaggcccccgcccgaccccggccccgctcgggactACCTGAAGTCGGACGGCtgcag	71	chrX	120851710	120851726	120851705	120851775
572	gp4	PC-3p-29999	GCAACGTCGGATCGTTA	17		ccccagagccacagcaacatgggatccgagccgcgtctgcaacctacaccacagctcacgGCAACGTCGGATCGTTAacccactgagcaagggcagggacc	101	chr2	85329608	85329624	85329584	85329684
573	gp4	PC-3p-48957	CAGTTAGGTCGGGAGGGA	18		attttgtaatgtcccagttgcactgacttctCAGTTAGGTCGGGAGGGAtatcatagctc	60	chr4	121938990	121939007	121938979	121939038
574	gp4	PC-3p-51982	CACTGTAGCTCACGGCA	17		ctatgccagagccacagtgacaccagatccgagccatgtctgcgaactaCACTGTAGCTCACGGCAaca	69	chr17	10424796	10424812	10424747	10424815
575	gp4	PC-3p-50740	TAGAGATCGAATCGGA	16		ctttcctttcggtcttttgagggccacacctgcagtctatggaggttcccaggcTAGAGATCGAATCGGAgcc	73	chr6	131485	131500	131431	131503
576	gp4	PC-3p-34178	GTACAGCAAAGTGATC	16		tttttattttttctgttatagttgatttacaatgtcctgtcaatttctgctGTACAGCAAAGTGATCc	68	chr18	41741095	41741110	41741094	41741161
577	gp4	PC-5p-2320	ATGTCCGCGGGTTCCCTATCC	21		atatacggtcggccctccatgtccgcgggttccctatcccgggttggttgagttcgcggATGCGGAACCTGCGGATACGGagggctgattgtactc	96	chr5	4391331	4391351	4391274	4391369
578	gp4	PC-5p-33325	TAGGGGTCGATTCGGA	16		tggaggttcccaggcTAGGGGTCGATTCGGAgctgtagctgccacaccacagccacagcaactcaggatctgagccgtatctgggacctac	91	chr18	23980038	23980053	23980023	23980113
579	gp4	PC-5p-10248	GGTGTAGGTCGGCGGC	16		ctcggatcccacgttgctgtgtGGTGTAGGTCGGCGGCtacagctctgattagacccctagcctgggaacctcc	74	chr6	116084676	116084691	116084654	116084727
580	gp4	PC-3p-35116	GTTTTGTCCGGATGTAT	17		caatgaacatacaggtgcgagtgtctttttcaaggaaaGTTTTGTCCGGATGTATgctcaaga	63	chr5	86063364	86063380	86063356	86063418
581	gp4	PC-5p-17308	TAGGGGTCGAGTCGGA	16		atttctggcgttgctcccacggcatatggaggttcccagccTAGGGGTCGAGTCGGAgct	60	chr10	42623717	42623732	42623676	42623735
582	gp4	PC-3p-49387	CAACTCGGATCTGGCGT	17		CAACTCGGATCTGGCGTtgctgtggctgcaatgtaggctggcagctgcagctctgatttgaccccagcctgagaac	76	chr13	9116514	9116530	9116455	9116530
583	gp4	PC-3p-7694	CGATGATGGTCCCTGTGTTTGT	22		caagggggctgtccccatggcacagggtccagctgtcggctgtaatacccgatgggtCGATGATGGTCCCTGTGTTTGGggcgagcactccgaa	94	chr6	43886644	43886665	43886629	43886722
584	gp4	PC-3p-29296	GCAAGGTCAGGGATGGA	17		ctgaGCAAGGTCAGGGATGGAacctgcaacctcacggttcctagtctgatttgttaac	58	chr10	41399106	41399122	41399102	41399159
585	gp4	PC-5p-44440	GCGGGAGCGGCCGGGGCC	18		cggcctttagcgtcccgaggccgccgccgagccgcccggcccgtgggttcctgcagGCGGGAGAGGCCGGGGCCggcctggcggacgcgcggccggggctgctggagggga	111	chr10	17018404	17018421	17018367	17018477
586	gp4	PC-3p-57648	CATATAGTTGGAATCA	16		ccctgatccttctcctgtgtccatagttttggcttttccagaatgtCATATAGTTGGAATCAtat	65	chr17	25389270	25389285	25389224	25389288
587	gp4	PC-5p-48483	CGTGGATTGGAAGAGT	16		gatggaaagacataccatgctCGTGGATTGGAAGAGTtaatattatcaaaatgactatatactacctaaagcagtctacagactcaatgtattccct	97	chr6	113492316	113492331	113492295	113492391
588	gp4	PC-3p-37277	TATATAGTAGGACCTCA	17		aagagactggatatggttccctgtatagtatagtacTATATAGTAGGACCTCAttgtctatccattctaaa	71	chr13	56822876	56822892	56822840	56822910
589	gp4	PC-3p-34905	TCTGTGAACTAGAAACCTCTGG	22		tcttacacagctttccagaggtttccagcttataggatattcatatggtagtTCTGTGAACTAGAAACCTCTGGaaagtggtgtacat	88	chr8	97945321	97945342	97945307	97945394
590	gp4	PC-5p-58250	ACCAGGATGACCGAGTGGT	19		cgACCACGATGACCGAGTGGTcccgcttcactccctcaagttcattgccacccttcagtacatcgtgggcc	71	chr1	75037132	75037150	75037082	75037152
591	gp4	PC-3p-7119	CACGGCAATACCAGATC	17		atagcaatgcaggattggagctgtgtctgtgacctgcaccacagctCACGGCAATACCAGATCcttaacccactgagcagagccag	86	chr18	31436843	31436859	31436797	31436882
592	gp4	PC-3p-58626	GAGGATGGTAGAACAGGAAGATGGA	25		ggaaatcaagtctttatgtaaagtgccatcttttgataatgaggctgaaagccaaatactGAGGATGGTAGAACAGGAAGATGGAgggagcctgt	95	chr6	91985756	91985780	91985746	91985840
593	gp4	PC-3p-27055	AGGGGCGGCGCGGGGCGGG	19		ggaggcccccggcgtcccgtcccgtggtctccccgcgAGGGGCGGCGCGGGGCGGGggtccgccggccttgcgggccgcc	80	chr6	249119	249137	249095	249174
594	gp4	PC-5p-43067	ATACAGCAAAGTGATC	16		gtctagttgatttacaatgttgtgtttcttttgggtATACAGCAAAGTGATCcagttatac	61	chr8	69020372	69020387	69020336	69020396
595	gp4	PC-5p-55708	TAGGCATCGAATCGGA	16		ggttcccagacTAGGCATCGAATCGGAgctacggccgctggcctatgtcacagccccagccactcaggatccgagccaagtctgcga	87	chrX	3712871	3712886	3712860	3712946
596	gp4	PC-5p-44729	GGAGGGTCGGAGGAGA	16		gccggGGAGGGTCGGAGGAGAccacttgtcatcctgagtgcatcagtggttcctcagtgggtctacctcggatctcctcac	81	chr18	22773053	22773068	22773048	22773128
597	gp4	PC-3p-58208	GGATGGTCGTTAGGAGGAGA	20		acacccctaacgcctcaagatgtgaccaggtttccgtgttttcattGGATGGTCGTTAGGAGGAGA	66	chrX	14722651	14722670	14722651	14722716
598	gp4	PC-3p-45597	ACCCTGCATTCAATCA	16		tgaacaaagctatccattttgatggtgaatgaaactggctaaactaACCCTGCATTCAATCAgaattgatccatgtgtaag	81	chr6	108011918	108011933	108011872	108011952
599	gp4	PC-5p-49190	GGCAGATCAGAGGGGTAA	18		gaGGCAGATCAGAGGGGTAAtaagagctagagtgtagactttaacatttactctgaatgatgcgga	66	chr13	131611976	131611993	131611974	131612039
600	gp4	PC-5p-27556	TATCCAGGCAGGTGCTGTTCTCT	23		tgctgtgtgtggtgcccTATCCAGGCAGGTGCTGTTCTCTttactagtgaacggcgcctgtgtggttagagtaaggctcacaaga	85	chrX	117268568	117268590	117268551	117268635
601	gp4	PC-5p-45059	TAGGTGTCGAATCGGA	16		cTAGGTGTCGAATCGGAgctgcagctgccagccagcaccaggagggatctgagctgcatctgagatctacactata	76	chr8	26316348	26316363	26316347	26316422
602	gp4	PC-5p-56327	ATAAAGTCGGAAGAGA	16		caagATAAAGTCGGAAGAGAaaaaaaataatttgtaaaatatggaatgtattagaatgtttctcattccttttattcat	79	chrX	125559650	125559665	125559646	125559724
603	gp4	PC-5p-36274	ATGGATCCTAGTCGGA	16		cctgagtcctcATGGATCCTAGTCGGAttcgtttccactgggccatggcaggaactcctc	60	chr18	6687291	6687306	6687280	6687339
604	gp4	PC-5p-31989	TAGGGATCGAATGGGA	16		ttagggccacactcgctgccagttcaatcctaaacTAGGGATCGAATGGGAgctgcagctgctggcctaca	71	chr5	65161883	65161898	65161863	65161933
605	gp4	PC-5p-8848	AACCTGGTTCTAAACCAT	18		gacataagcaAACCTGTTTCTAAACCATaatctcaaggatagatagatagttcagaataggtattagtttattat	75	chrX	64045542	64045559	64045532	64045606
606	gp4	PC-5p-53374	GTGGATTGAGGGCGGAATG	19		tggggcggaatggagtaGTGGATTGAGGGCGGAATGcggccggggtaaccgggttgttctggttgacgtaatgctctttgagcggcacgttttgcc	96	chr18	46007777	46007795	46007717	46007812
607	gp4	PC-5p-41031	GCTGGATTGTAGGGTGGAGGAGAA	24		aaaggacaGCTGGATTGTAGGGTGGAGGAGAAtcgtatggttgtaattttcctcagttctgcgttcacctttccatc	77	chr2	127727869	127727892	127727824	127727900
608	gp4	PC-5p-58697	GCAGATTAAGGATTCA	16		attggctggggagttccctcgtggcacaGCAGATTAAGGATTCAgcattttcactgctggggcttgggtcactgctgtggcacaggtttgctccctggcccag	103	chr6	26775445	26775460	26775417	26775519
609	gp4	PC-5p-49283	CAGAGCAGGAGGAAGGGA	18		cggataggtgattgGAGAGCAGGAGGAAGGGAggggctgcagtaactcaccctccccacctccgcttcaggcctgtgtc	79	chr6	79375386	79375403	79375372	79375450
610	gp4	PC-5p-33677	CACAGGTAGGAGGGGT	16		agaggaggccacaacCACAGGTAGGAGGGGTgatttcgtgatataaacaaccccatacctcccgggtgggaagccccaca	80	chrX	12972951	12972966	12972902	12972981
611	gp4	PC-3p-46523	CATGAGGAGGTCGGGGTCA	19		tcaaagaaaagagatagctcccacttaatctgaacagctaccattaaagtggtgaaaagaCATGAGGAGGTAGGGGTCActttgacgt	88	chr13	51807921	51807939	51807912	51807999
612	gp4	PC-3p-31237	TATACAGTAGGACTTCA	17		aatcttttccattatggtttatcataggacattgaatatagttctctgtgcTATACAGTAGGACTTCAttgtttatcctctccatgtgtaagagttg	97	chr13	25057795	25057811	25057744	25057840
613	gp4	PC-5p-56505	GGATGATCAGAGGAAGTCA	19		ttatttgttttttaaaatGGATGATCAGAGAAAGTCAtccttgattatgttatttggatgattgtggcattccttttcctagataaacaa	90	chr4	25581864	25581882	25581846	25581935
614	gp4	PC-5p-52238	GTCAGTGAGTCGGGGATC	18		atccgtgggggtgcatgttcaatctctggcctcgcTCAGTGAGTCGGGGATCcagcgtttccatgagc	68	chr1	104112022	104112039	104111988	104112055
615	gp4	PC-3p-33990	GGAGGATCAAGGACACA	17		aactgtacttaggatgctctgcatttttctcttggaggaagcggctcaGGAGGATCAAGGACACAgcatccaagaaacattt	82	chr1	293618773	293618789	293618756	293618837
616	gp4	PC-3p-42894	CACAGCAATACCAGACC	17		tagggttcgaattggaactgttgctgccggcctacgccagagcCACAGCAATACCAGACCtgagccgca	69	chr1	42815144	42815160	42815101	42815169
617	gp4	PC-3p-45009	GGACTTCCCGTGTGGCT	17		catgccataaagttcacaaatttaaaaggtaaatctcGGACTTCCCGTGTGGCTca	56	chr10	33808996	33809012	33808959	33809014
618	gp4	PC-5p-7882	AGACGGATGACCTTGCTGTTT	21		caagaagaaaggggaaaaaaAGACGGATGACCTTGCTGTTTacatttagaaaggataagcagcaaggttgtctgtctttttttcctctctgttcttcagc	100	chr2	131648372	131648392	131648313	131648412
619	gp4	PC-5p-44199	GTTAAGGATCGGGTGT	16		cttgctcagtggGTTAAGGATCGGGTGTtgctgtgactgtggtataggccggcagctgaagctccgatttgacccctagcccg	83	chr17	55821771	55821786	55821759	55821841
620	gp4	PC-3p-41498	CAATTGATGAGGAGGAAGAGGACATT	26		aaacgttcccgattttcttgaccatcctccgaaagataaatcctatagagagaattatCAATTGATGAGGAGGTAGAGGACATTgatgataagagcgaga	100	chr17	64331581	64331606	64331565	64331664
621	gp4	PC-5p-51030	CTAGGGGTCAAGTCGGA	17		ccaggCTAGGGGTCAAGTCGGAgctacagctgctggcctacaccacagccatagcactgccagatcccagctgca	75	chr2	130552071	130552087	130552066	130552140
622	gp4	PC-3p-44897	TCCTCTTTTGTATAGTGG	18		gaagtttaatactttgcaagactagaaaactTCCTCTTTTGTATAGTGGgaaataga	57	chr8	54070629	54070646	54070621	54070677
623	gp4	PC-3p-39976	TCAGCAATTCTTGGTTCTCATTT	23		aaaggtgttctggagAGGGAACCTGGAAAAGCTGAAGgtgtaatatgaaaacctcagcaattcttggttctcatttttaggacatcaat	89	chrX	76730896	76730918	76730883	76730971
624	gp4	PC-5p-33921	TAGGGGTTGAGTCGGA	16		ccaggcTAGGGGTTGAGTCGGAgctgtagctgccagcctatgccagagccacagccactcaggatccttaagccact	77	chr18	7867718	7867733	7867712	7867788
625	gp4	PC-5p-39118	CACAGTTCCTAGTCGGA	17		acctCACAGTTCCTAGTCGGAttcattaaccaatgagctgagatgggaactcctgaaga	59	chr18	4640742	4640758	4640738	4640796
626	gp4	PC-5p-32141	GTTGCGGGGCACGTAGCGTGTG	22		ctGTTGCGGGGCACGTAGCGTGTGtgtgttaggtacacacgagcgtgtcctgcaatct	58	chr8	3174415	3174436	3174413	3174470
627	gp4	PC-5p-16513	GCGCGCGGTCGCCCGGGGA	19		ggcgcccacaGCGCGCGGCCGCCCGGGGAatgagtcctcgggaacgtctgcgcctgggcctc	62	chr2	4857505	4857523	4857495	4857556
628	gp4	PC-3p-49747	CAAGGACTGACTGTACAC	18		gcccctgacagaaagtcatggctcccctccccatctctggagtggggttatgtcCAAGGACTGACTGTACAGgatg	76	chr8	92691863	92691880	92691809	92691884
629	gp4	PC-3p-56303	CATAGGGCCAGGGAGGGT	18		accccgaacccgtccattcccctgccctgtccccctgtaccctcCATAGGGCCAGGGAGGGCaagtcagctctgggacttgggaggacccggaag	95	chr1	284432599	284432616	284432555	284432649
630	gp4	PC-3p-56283	CGACTAGGAACGATGA	16		aaaataaagttcggagttcctgttgtggctcagtggttaactaatcCGACTAGGAACGATGAggttgtagg	71	chr17	54841969	54841984	54841960	54842030
631	gp4	PC-3p-28725	AACCAGACTCTGAGAGCAGGACT	23		tgagcctgccttcctgtcgttgccctctctgtcttggtctggattttcccaAACCAGACTCTGAGAGCAGGACTggagtacaggtagt	88	chrX	7186261	7186283	7186210	7186297
632	gp4	PC-5p-58681	CAGCAAAGCAGCAGGGCC	18		aaaaaaaaaCAGCAAAGCAGCAGAGCCtaccttcattttctgagaatggttttcttctgttttttaga	68	chr8	83564587	83564604	83564578	83564645
633	gp4	PC-3p-44175	GCCTTGATCGGTGGGT	16		gttgtggcttagcaggttacaaacctaacgagtattcatgaggatgagggttcgatccctgGCCTTGATCGGTGGGTtacggattcagcattgccgcaagat	102	chr18	13201649	13201664	13201588	13201689
634	gp4	PC-5p-38477	TATAGAGCAGGACTTCA	17		tatagttccctgtggTATAGAGCAGGACTTCAttgcttatccattctaaatgcaatagttcacatctattaaccccaaactcca	84	chr10	36707241	36707257	36707226	36707309
635	gp4	PC-5p-57957	GAGCAGGGGCAGGGACC	17		tGAGCAGGGGCAGGGACCgaacctgcaacctcatggttcctagtcggtttcgttaaccactgcacc	66	chr18	51126204	51126220	51126203	51126268
636	gp4	PC-3p-8038	GTGGTTAAGGCTTTGGATTT	20		gttgtcaaatgcttgcttcgaaatttatttttaacatatgcaataaaattGTGGTTAAGGCTTTGGCTTT	70	chrX	124610932	124610951	124610882	124610951
637	gp4	PC-3p-43104	CATCATTCCTAGTCGGA	17		agtggaatgatctgaccttgggaaatctgtccctatggcaataagaCATCATTCCTAGTCGGTttactcccac	73	chr6	32210300	32210316	32210254	32210326
