# Supplementary material for: MicroRNAome and Expression Profile of Developing Tooth Germ in Miniature Pigs
Source: PLoS One. 2012 Dec 18;7(12):e52256. doi: 10.1371/journal.pone.0052256 (PMC3525553; doi:10.1371/journal.pone.0052256)
Supplement: Table S4 — Differentially expressed miRNAs detected by hierarchical clustering analysis of the microarrays data. (XLS) [file pone.0052256.s008.xls]

## Sheet: Sheet1
Statistic Test Report
No.	Sample Name	Group Name
1	E35G1	group 1
2	E35G2
3	E35G3
4	E45G1	group 2
5	E45G2
6	E45G3
7	E50G1	group 3
8	E50G2
9	E50G3
10	E60G1	group 4
11	E60G2
12	E60G3

## Sheet: Test Result
Table 4 Differentially expressed miRNAs detected by hierarchical clustering analysis of the microarrays data(Simple Normalized Data)
differentially expressed miRNAsis is marked by red (p-value<0.01) and yellow (p-value<0.05) ; "/": Expression level difference did not reached the significant levels (p>0.1)
			group 1		group 2		group 3		group 4		E35/E45	E45/E50	E50/E60	E35/E50	E45/E60	E35/E60
No.	Reporter Name	p-value	Mean	StDev	Mean	StDev	Mean	StDev	Mean	StDev	p-value	p-value	p-value	p-value	p-value	p-value
1	ssc-miR-1308	6.53593e-05	23581.6	4044.01	20896.4	3024.56	8377.79	1308.36	13230.4	139.75	/	0.00541406	0.0374107	0.00473213	0.034813	0.0296112
2	miR-199a-3p-56318	0.000199984	16380	1490.53	7783.82	1782.27	7306.89	479.692	6610.04	1022.93	0.0310913	/	/	0.00120273	/	0.00297875
3	ssc-miR-199a-3p	0.000206682	16160.7	959.491	6905.03	1814.02	6866	617.268	6020.47	1040.68	0.0274578	/	/	0.00085977	/	0.0103111
4	ssc-miR-192	0.000265148	20.6134	15.5056	26.7021	18.0708	24.4548	17.0644	593.622	190.351	/	/	0.00449233	/	0.00462019	0.0169863
5	PC-5p-58250	0.000270891	1443.36	373.512	1280.36	148.121	411.552	90.0438	271.203	134.953	/	0.00371003	/	0.00876157	0.0305442	0.0132353
6	miR-139-5p-5165	0.000296104	188.147	8.33781	265.749	73.5059	355.257	42.5206	487.299	32.9672	/	/	0.0263607	0.0128777	/	0.000259641
7	miR-214-3p-314	0.000526169	23107.2	3195.16	14038.9	2463.01	13967.2	1808.82	7162.97	1819.75	0.0337238	/	/	0.0209777	0.0378924	0.00725329
8	PC-5p-42602	0.000528923	17.6793	15.1891	17.0041	13.8502	19.8504	17.0114	515.612	166.37	/	/	0.0208144	/	0.0176931	0.0195322
9	PN-199c-3p-271	0.000588143	16511.9	969.753	6041.14	2185.83	6246.69	622.203	5579.62	1269.43	0.0339471	/	/	0.000679984	/	0.0145092
10	miR-7d-3p-4142	0.000664065	99.2207	44.7541	458.627	53.6189	391.857	79.1039	446.29	148.501	0.0258538	/	/	0.0367453	/	0.0190515
11	ssc-miR-199b*	0.000729636	17785.8	1079.84	7041.67	2588.97	6880.47	811.349	6578.09	1004.6	0.0416396	/	/	0.00647251	/	0.00944682
12	ssc-miR-335	0.000782978	874.544	262.713	50.501	52.3633	35.3992	5.34501	70.2426	54.9515	0.0344748	/	/	0.0041396	/	0.0277006
13	ssc-miR-125b	0.00105297	22948.4	2010.02	11734	2734.97	13103.6	1605.27	11378.2	813.222	0.0419436	/	/	0.00805508	/	0.00179131
14	miR-199b-5p-484	0.0010626	1223.61	63.985	813.36	106.278	597.379	43.7325	687.207	159.707	0.0390657	0.0424726	/	0.000869156	/	0.0457238
15	ssc-miR-214	0.00172091	24495.8	3008.75	16330	1509.41	15649.2	2421.14	8583.44	2884.19	0.0206666	/	/	0.0303965	/	0.0389603
16	PN-200b-3p-161	0.0017901	209.035	119.485	858.73	366.885	1426.58	261.485	1961.37	677.547	/	/	/	0.0470641	/	0.0415107
17	PN-495-3p-530	0.00234259	719.922	20.3382	483.776	352.604	212.159	44.207	131.703	19.3533	/	/	0.0480545	0.00940645	/	0.00240659
18	PC-103-3p-49493	0.0023855	2411.97	239.232	1468.72	246.032	1396.03	32.9857	1791.5	257.7	0.0205908	/	/	0.0120812	/	/
19	miR-126-3p-3530	0.00355284	1161.42	161.76	583.387	91.4225	694.03	163.929	926.299	91.055	0.0117279	/	/	0.0420542	0.022907	/
20	ssc-miR-181b	0.00365724	1910.81	391.112	1328.89	84.9007	1604.36	74.5204	2432.07	325.999	/	0.0259197	0.0400098	/	0.0210088	4.43458e-05
21	ssc-miR-125a	0.00368905	7927.93	1445	3482.06	369.837	4686.54	966.998	4432.17	935.237	0.00684443	/	/	0.0493393	/	0.0337763
22	miR-181b-5p-24202	0.00375494	1644.77	287.904	1051.24	175.176	1352.84	118.088	1988.54	233.282	/	/	0.0208358	/	0.0128223	/
23	miR-107-3p-33	0.00391369	2229.52	188.752	1334.74	268.569	1316.68	41.0297	1685.36	262.355	/	/	/	0.0101214	/	/
24	PN-140-3p-18	0.00392751	396.64	170.347	67.0579	41.3052	53.2486	17.4636	82.2576	20.7654	0.0352537	/	/	0.0100142	/	0.0175392
25	PN-200c-3p-193	0.00414761	464.337	179.664	1101.01	665.87	1599.33	115.886	2849.1	485.073	/	/	0.0364093	0.0320542	/	0.0183151
26	PN-181c-5p-27101	0.00610496	834.214	167.585	436.499	179.268	859.707	43.5121	1157.85	106.325	/	/	0.0173246	/	/	/
27	ssc-miR-103	0.00615201	1892.66	170.244	1124	257.87	1094.3	28.5311	1383.69	230.586	/	/	/	0.0099156	/	/
28	ssc-miR-26a	0.00687598	14260.1	1028.49	8796.15	2897.69	10823.7	222.762	17085.8	2695.72	/	/	0.0386344	0.0237483	/	/
29	PN-380-3p-267	0.00737571	518.523	115.375	149.116	114.464	164.518	60.4518	85.4021	34.561	/	/	/	0.0246516	/	0.00566402
30	ssc-miR-99a	0.00964836	1651.15	93.4009	709.038	122.266	844.856	111.939	861.759	328	0.0155605	/	/	0.0157804	/	/
31	PC-103-5p-40816	0.00974559	1591.62	231.412	505.499	264.506	781.435	149.862	918.196	104.664	/	/	/	0.0159013	/	0.0148909
32	miR-432-5p-807	0.0102289	352.205	53.9036	263.45	220.084	126.976	25.764	59.5432	8.85091	/	/	0.0164363	0.00701601	/	0.00083229
33	ssc-miR-140*	0.0102569	1451.29	376.596	443.482	475.504	149.975	15.9772	378.254	166.69	/	/	/	0.00547203	/	/
34	ssc-miR-128	0.0109146	1688.95	361.211	921.219	500.012	704.594	35.876	641.857	54.8499	/	/	/	0.0197532	/	0.0178864
35	ssc-miR-99b	0.0115385	2168.52	343.877	1310.48	563.66	1108.95	18.0442	980.478	111.79	/	/	/	0.0207142	/	0.0068079
36	ssc-miR-100	0.0122115	1831.62	112.512	713.457	248.749	920.564	272.974	809.064	243.555	0.0393453	/	/	/	/	0.0424603
37	ssc-miR-432	0.0123414	379.412	78.1865	281.99	247.251	126.237	31.1904	61.4597	2.72036	/	/	0.0465785	0.01149	/	0.00507692
38	ssc-miR-107	0.0136198	1730.27	203.176	967.345	305.967	983.734	50.7631	1229.37	184.39	/	/	/	0.0176039	/	/
39	ssc-miR-30d	0.0138368	965.652	33.5585	883.317	125.352	848.049	111.23	1556.16	435.219	/	/	/	/	/	/
40	PN-320b-3p-5073	0.0142883	1552.07	146.076	2040.56	347.878	2285.82	32.3789	1706.36	205.486	/	/	/	0.0197856	/	/
41	miR-320-3p-5	0.0144108	1504.51	167.392	1973.67	310.872	2224.07	75.7248	1669.29	218.659	/	/	/	0.0264976	/	/
42	PN-599-5p-187	0.0179542	74.1234	82.5589	1564.79	1484.05	2127.86	287.515	289.957	165.526	/	/	0.0235519	0.0266953	/	/
43	PN-320c-3p-599	0.0183762	1570.15	189.073	2072.07	377.524	2262.81	38.4209	1721.88	108.782	/	/	0.018514	0.0340014	/	/
44	miR-30c-5p-2750	0.0193223	1425.75	101.774	1014.22	280.029	1450.09	132.892	1679.74	86.3172	/	/	/	/	/	0.0461955
45	ssc-miR-320	0.0193239	1793.06	152.246	2460.87	202.482	2483.78	200.419	1951.45	372.819	0.0191431	/	/	0.0181894	/	/
46	PN-100-5p-58610	0.0196052	2185.82	85.473	999.682	349.153	1041.05	313.66	1064.89	194.439	/	/	/	/	/	0.0235743
47	PN-200b-3p-110	0.0203746	347.622	150.56	1024.95	822.685	1444.24	324.681	2300.27	363.394	/	/	/	0.044514	/	0.0239593
48	ssc-miR-181a	0.0233518	3911.51	317.2	2841.73	716.571	2695.16	238.389	5443.06	1954.62	/	/	/	0.0128788	/	/
49	miR-31-5p-42472	0.0250924	42.4653	5.99919	287.618	222.42	496.435	55.4981	169.446	55.585	/	/	0.0345448	0.000154557	/	0.024888
50	PN-320c-3p-11241	0.0255189	1541.25	144.235	2063.92	437.452	2275.45	70.9544	1697.54	186.679	/	/	0.0481053	0.0199924	/	/
51	miR-7i-5p-8	0.0259819	4171.72	1147.26	6281.95	2575.62	7292.05	419.414	8554.54	761.84	/	/	/	/	/	0.0442761
52	ssc-miR-199a-5p	0.0266826	2972.85	714.609	2122.82	1165.24	933.938	194.485	949.176	432.801	/	/	/	0.00703552	/	0.0248517
53	ssc-miR-181d	0.0268209	383.967	139.407	73.2721	45.6564	398.084	260.78	433.595	133.841	/	/	/	/	/	/
54	PN-382-5p-139	0.0274803	839.706	128.652	684.538	544.424	339.863	30.1791	235.605	12.9167	/	/	0.00941376	0.00297256	/	0.00522837
55	PN-409-3p-335	0.0292139	667.45	56.6483	471.491	349.363	322.654	114.284	169.855	26.0539	/	/	/	/	/	0.00094239
56	miR-133a-3p-1466	0.0314462	345.582	113.119	254.374	362.216	22.8476	2.71487	50.0612	14.1562	/	/	/	0.00686502	/	0.00579502
57	miR-181a-5p-39722	0.0317384	759.63	186.216	133.566	47.9687	499.709	361.691	1120.98	524.977	0.00804965	/	/	/	0.0137736	/
58	ssc-miR-222	0.0384594	467.627	92.8592	444.103	134.247	382.98	23.8848	279.216	11.7902	/	/	0.00550004	/	/	/
59	PN-1-3p-13186	0.0384755	2532.52	404.164	2110.01	3564.48	73.1169	34.1756	56.9351	57.3895	/	/	/	0.00744818	/	0.0179175
60	PN-181b-5p-4329	0.0384946	1075.54	363.004	636.58	208.91	948.22	73.0371	1318.1	49.1252	/	/	0.0209831	/	/	/
61	ssc-miR-30b-5p	0.0392189	403.638	74.1823	243.014	130.333	594.321	233.366	734.405	108.021	/	/	/	/	/	0.0198049
62	PN-103-3p-30235	0.0423935	1233.61	223.407	622.906	220.585	841.5	89.2905	860.396	132.097	/	/	/	/	/	/
63	PN-487b-3p-443	0.0438585	700.436	35.1109	639.97	700.183	214.448	14.4772	170.337	36.4168	/	/	/	0.000153704	/	0.00714332
64	PN-205-5p-5764	0.0479707	4526.08	1664.63	4357.02	1095.97	5369.11	462.236	8492.52	1605.25	/	/	/	/	0.0354187	/
65	miR-133b-3p-56920	0.0492281	275.051	84.4711	212.447	329.039	15.611	2.96805	36.6798	15.7603	/	/	/	0.00114649	/	0.0093383
66	miR-181d-5p-4330	0.0505966	1195.32	360.942	713.094	263.607	1109.75	143.203	1439.76	83.0875	/	/	/	/	/	/
67	ssc-miR-299	0.0507865	363.101	77.8933	336.379	255.367	172.979	11.876	134.319	28.16	/	/	/	0.0344871	/	0.0127358
68	ssc-miR-23b	0.0526209	4514.97	557.11	4958.68	2413.77	6785.71	161.702	8479.61	1145.28	/	/	/	0.0292972	/	0.00932288
69	ssc-miR-206	0.0533738	3183.25	433.91	3277.38	5566.79	94.7591	45.7875	78.3908	83.0224	/	/	/	0.00626521	/	0.0210782
70	miR-205-5p-304	0.0539282	5217.68	1897.6	4921.93	1410.16	5909.42	390.635	9619.91	1696.41	/	/	0.0479485	/	0.0432824	/
71	PN-299-5p-13746	0.0540178	344.249	55.4394	326.888	247.637	155.085	19.9485	134.212	30.178	/	/	/	0.00783267	/	0.0112828
72	ssc-miR-133a	0.0557206	390.22	119.08	346.977	526.058	24.0132	4.88442	56.0651	18.3598	/	/	0.0396814	0.00121686	/	0.00589312
73	PN-379-5p-1421	0.0583596	649.408	64.8251	589.161	454.582	376.182	83.228	212.476	37.026	/	/	0.0417909	/	/	0.00245337
74	PN-92b-3p-50709	0.0596492	3811.12	157.57	4151.6	898.051	4289.53	114.966	3192.48	150.168	/	/	0.0024249	0.0245269	/	0.0157233
75	PC-7b-5p-10	0.0634607	1740.91	697.904	3620.98	2127.54	4480.98	1493.24	5046.81	1585.47	/	/	/	/	/	0.0490122
76	PN-409-3p-5527	0.0640505	647.81	23.6437	445.615	372.022	326.937	136.331	175.941	8.65404	/	/	/	/	/	/
77	PN-200a-3p-145	0.0649099	92.0138	26.6065	210.254	147.685	260.79	60.288	408.105	90.4288	/	/	/	0.0185801	/	0.00683912
78	PN-320d-3p-2200	0.066922	980.188	176.103	1286.79	398.043	1630.16	152.65	1050.9	120.429	/	/	0.0134178	0.0499052	/	/
79	ssc-miR-30c	0.068191	873.554	144.273	557.981	225.379	931.987	108.609	975.612	127.971	/	/	/	/	/	/
80	ssc-miR-133b	0.0746579	548.333	203.322	573.601	922.747	24.0586	3.15354	63.2407	30.0785	/	/	/	0.00706746	/	0.00988365
81	ssc-miR-98	0.0751052	69.8621	27.8406	157.49	147.625	443.434	299.484	411.406	310.689	/	/	/	0.042899	/	0.041812
82	PN-92a-3p-3446	0.075537	3611.8	348.737	3619.98	771.22	4090.79	348.892	2894.49	264.02	/	/	0.0178174	/	/	/
83	ssc-miR-23a	0.0778586	4600.31	697.395	4271.73	2040.23	5699.19	517.059	7400.77	1205.87	/	/	/	/	/	0.0361377
84	PC-5p-26373	0.0799429	7918.77	1852.35	13122.5	7034.21	13200.8	2624.13	5092.39	1883.41	/	/	0.0230623	/	/	/
85	miR-23a-3p-217	0.0884524	5146.48	782.679	5268.27	1578.74	6294.73	280.483	7861.28	1710.37	/	/	/	/	/	/
86	PN-26b-5p-197	0.0894334	3162.87	290.561	1857.76	1174.72	3155.62	963.123	4904.26	1539.95	/	/	/	/	/	/
87	PC-7f-3p-54949	0.0904094	49.8615	32.2139	175.976	183.753	846.404	680.935	618.574	772.402	/	0.0324731	/	/	/	/
88	PN-193b-3p-948	0.0922793	511.919	94.8941	357.138	105.469	261.639	63.6439	302.72	135.831	/	/	/	0.0333478	/	/
89	PN-7e-5p-4024	0.0933657	92.2107	66.3045	270.729	271.567	1394.68	1159.37	1117.7	1308.78	/	0.0443888	/	/	/	/
Following transcripts are statistically significant but have low signals (signal < 500)
90	PN-140-5p-5323	0.000273496	61.2607	8.449	17.5808	4.0958	13.2585	2.54208	22.8247	7.17059	0.00441337	/	/	0.00175277	/	0.0404617
91	ssc-miR-210	0.0003545	40.9589	6.78075	74.2436	26.9647	74.6254	5.84398	330.567	148.642	/	/	0.0339539	0.0278733	0.0260899	0.0186107
92	PN-1247-3p-11661	0.000374887	9.95296	1.09755	22.6416	4.20682	29.374	4.69561	22.6881	4.84713	/	/	/	0.00232293	/	/
93	PN-1247-5p-2591	0.000446436	35.1515	5.50867	272.372	150.068	275.321	52.7656	299.276	65.3092	0.0460887	/	/	0.000803683	/	0.0008032
94	ssc-miR-148a	0.000675878	187.273	19.769	67.571	9.79668	114.175	36.2761	210.033	51.2373	0.00216502	/	/	/	0.00629936	/
95	ssc-miR-450c	0.000956582	32.3383	13.8947	5.58151	3.0698	2.87504	2.43826	0.818605	0.0533825	0.0288799	/	/	/	/	0.00477562
96	miR-335-3p-18172	0.00111602	66.4264	8.91153	17.7958	5.74628	16.596	6.46252	10.9586	3.6527	0.0269982	/	/	0.0337576	/	0.0159149
97	PN-1224-5p-3082	0.00136487	27.2076	5.68235	54.4492	3.49395	44.2186	5.39694	91.3578	35.2778	0.0281721	/	/	0.0349736	/	0.0170763
98	ssc-miR-424	0.00144348	61.1825	29.9743	11.0165	3.57173	6.66827	2.85211	9.96883	4.11236	0.0160561	/	/	0.0105068	/	0.0180016
99	PN-323b-3p-1142	0.00187932	69.3631	5.52892	35.2848	9.92656	26.1376	8.72763	21.0186	4.32548	/	/	/	0.0408715	/	0.0123231
100	PN-329-5p-11345	0.00352953	29.9985	3.10006	13.251	3.71489	17.2351	4.93286	11.2868	2.88084	0.0360073	/	/	/	/	0.0230732
101	PN-485-3p-375	0.00384949	311.747	49.1582	229.698	128.593	133.581	21.3322	82.5826	18.0003	/	/	/	0.00794433	/	0.0036966
102	PN-1224-5p-34251	0.00465871	24.593	1.5163	55.1184	12.37	45.6786	3.52298	100.97	53.7648	0.0286107	/	/	0.00171359	/	/
103	miR-429-3p-734	0.00502883	42.1445	17.7802	102.564	52.3657	173.197	9.06321	189.171	63.4473	/	/	/	0.029733	/	0.0169869
104	PN-412-5p-4020	0.0054061	137.388	4.59196	55.6117	44.0627	32.5523	10.8143	26.476	2.34005	/	/	/	0.0149763	/	0.00105788
105	PN-539-5p-31092	0.0061814	112.498	30.7761	60.4142	28.9718	46.4851	10.3391	31.5092	4.06415	/	/	/	0.022705	/	0.0177351
106	miR-215-5p-37456	0.00663639	11.6342	2.93185	9.66437	1.69501	11.1857	4.10257	29.3007	9.22358	/	/	0.0400529	/	0.0145778	0.0333435
107	PN-375-3p-3473	0.00677631	25.1953	6.96218	45.3505	27.3597	119.589	47.7767	34.8079	8.13171	/	/	0.0170149	0.0115363	/	/
108	PN-376d-3p-9586	0.0071416	29.8995	4.5498	8.70566	3.56931	11.9522	5.28356	7.32339	2.68609	0.0491953	/	/	/	/	0.028333
109	PN-376c-3p-2496	0.00777853	175.926	50.2419	76.3688	24.3849	71.2466	25.4784	38.7147	18.8579	0.0472548	/	/	0.0383697	/	0.0186123
110	PN-660-5p-1115	0.00823821	69.9676	5.93783	45.7696	14.7464	29.9396	6.58213	36.4254	9.34689	/	/	/	0.0229299	/	0.0455914
111	PN-409-5p-873	0.0109002	72.1968	7.43941	46.3659	26.6433	34.0107	8.91937	21.117	5.28871	/	/	/	0.0451515	/	0.0179891
112	PN-329a-3p-32943	0.01249	67.0047	8.11126	33.7219	8.4982	30.3513	3.45517	22.4813	12.1221	/	/	/	0.0035419	/	/
113	ssc-miR-323	0.0134237	260.217	5.57809	158.773	90.248	107.58	22.0279	73.2146	26.8037	/	/	/	0.0185261	/	0.0255386
114	PC-22-3p-57394	0.0141217	36.394	1.96889	36.3705	9.34408	28.5718	3.2651	65.2524	23.0372	/	/	/	/	/	/
115	ssc-miR-139-5p	0.0147012	29.6523	1.89199	51.1339	18.9663	95.8651	2.60888	96.2406	61.3851	/	/	/	0.00120071	/	/
116	PN-551b-3p-28603	0.015312	9.54059	4.22866	20.8781	6.21593	19.6603	1.53433	26.7262	7.6868	/	/	/	/	/	0.0392054
117	PC-3p-19139	0.016418	7.41005	4.1954	7.72976	3.74862	7.71293	4.07942	33.1037	9.80142	/	/	0.019703	/	0.0180537	/
118	ssc-miR-143	0.0183037	310.084	36.8179	211.183	45.7299	135.071	23.8095	190.558	68.7828	/	/	/	0.00702588	/	/
119	miR-326-3p-20734	0.019232	21.7645	6.01155	58.9921	22.0843	46.245	15.3428	51.6332	11.848	0.0330854	/	/	/	/	0.0283723
120	PN-543-3p-264	0.02073	202.155	26.8786	235.152	190.035	93.4523	18.6102	59.0772	16.2364	/	/	/	0.0100153	/	0.018101
121	PN-485-5p-400	0.0209846	52.3752	7.3563	40.2076	5.16962	32.8851	9.90377	24.1751	9.09727	/	/	/	/	/	/
122	miR-431-5p-35690	0.0211447	67.659	2.9341	50.5949	47.6742	16.6299	3.72173	17.1652	6.86769	/	/	/	0.00883881	/	0.0274196
123	PN-330-3p-2129	0.0221521	28.7403	4.4535	35.2571	6.34097	48.8144	4.22309	49.29	14.4715	/	/	/	0.0148144	/	/
124	ssc-miR-424*	0.022802	67.162	15.2227	29.2211	22.2785	20.7402	1.75141	23.2824	4.28961	/	/	/	0.0129	/	0.00796579
125	miR-452-5p-863	0.0239941	28.599	7.3116	9.46531	5.14903	8.54298	4.04713	7.24591	3.32272	0.0367886	/	/	/	/	/
126	PC-3p-174	0.0281135	228.153	41.3463	342.336	12.0205	339.887	61.0386	319.5	49.7144	/	/	/	/	/	/
127	ssc-miR-30e-5p	0.0284205	142.622	22.2464	122.158	39.1845	231.303	69.3314	261.634	57.3264	/	/	/	/	/	0.0333155
128	PN-188-5p-10334	0.0324096	45.8588	11.9842	110.086	35.1072	86.4507	34.6414	86.5384	18.0213	0.0311341	/	/	/	/	0.0416149
129	miR-874-3p-24775	0.0330634	41.2932	4.69503	68.386	4.36073	52.0081	7.5573	60.2099	15.1406	0.00686007	/	/	/	/	/
130	miR-424-5p-2477	0.033191	153.764	38.1629	11.8031	6.32317	20.9191	21.866	44.7983	57.4302	0.0153039	/	/	/	/	/
131	miR-187-5p-29087	0.0334297	15.4322	1.09211	27.1745	9.98103	32.0883	4.60222	30.3966	9.23708	/	/	/	0.0165757	/	/
132	ssc-miR-1306-3p	0.0344237	38.4973	11.0075	55.7315	14.1332	75.4985	14.1442	43.9479	7.72204	/	/	0.0399695	0.0384906	/	/
133	ssc-miR-500	0.0359301	54.0925	7.66838	35.9593	7.77716	32.1223	3.04192	27.5706	11.7498	/	/	/	0.0133039	/	/
134	ssc-miR-193a-3p	0.0369517	135.304	46.5789	48.8219	21.0955	60.2907	22.8783	46.4149	15.29	/	/	/	/	/	0.0358779
135	ssc-miR-708	0.0385492	311.204	41.5943	184.267	69.4328	141.895	24.6708	179.452	51.1163	/	/	/	0.00884119	/	/
136	ssc-miR-184	0.039245	22.2025	10.1482	10.662	4.78485	6.31438	2.93344	6.98294	2.89475	/	/	/	/	/	/
137	ssc-miR-486	0.0406682	43.3775	7.62804	54.8487	32.6143	25.3796	1.96138	19.8689	4.08157	/	/	/	0.0426828	/	0.0146658
138	PN-429-3p-6578	0.0407708	52.1343	19.8128	103.086	68.5482	188.122	24.1472	220.009	62.8733	/	/	/	0.0361764	/	0.0152912
139	PN-329a-3p-1371	0.0421557	295.822	28.3768	244.87	217.441	104.365	25.0635	80.8126	13.5666	/	/	/	0.020545	/	0.00139378
140	ssc-miR-758	0.0458068	58.3801	6.09627	45.5668	21.2378	28.2848	7.23141	25.8816	10.967	/	/	/	0.0475258	/	/
141	PN-875-3p-15533	0.0519553	14.2567	1.59161	57.0138	39.539	65.569	27.5729	21.2314	7.6864	/	/	0.0411845	0.0243746	/	/
142	miR-363-3p-495	0.0536364	98.4847	40.2182	45.1466	17.9573	50.5795	3.59901	49.5417	8.96542	/	/	/	/	/	/
143	PC-3p-58735	0.0547098	24.4136	2.21373	39.605	11.1684	24.9915	1.55843	37.8028	10.0532	/	/	/	/	/	/
144	PN-200a-5p-7019	0.0550284	18.1435	2.37202	30.9001	7.5053	27.4345	7.59385	33.2012	6.5501	/	/	/	/	/	0.0225932
145	PC-5p-24688	0.0550774	20.4603	7.1628	42.2469	14.374	17.4651	7.76802	17.9561	5.87407	/	/	/	/	/	/
146	miR-370-3p-2334	0.0571074	43.6655	11.4029	44.8733	9.23777	40.0053	7.56354	25.8537	6.58516	/	/	/	/	/	/
147	miR-30a-5p-186	0.0599185	148.014	26.191	98.4346	54.2918	223.413	65.6504	241.897	85.0854	/	/	/	/	/	/
148	miR-187-3p-54578	0.061694	11.9799	3.56956	19.3575	7.15462	28.751	7.82597	30.2824	13.8097	/	/	/	0.0358561	/	/
149	ssc-miR-215	0.0650534	23.3002	10.5319	10.711	7.48625	23.8411	4.55295	27.9046	1.134	/	/	/	/	/	/
150	PN-300-3p-13997	0.0651996	134.451	42.8944	108.985	57.1214	75.4532	19.3674	43.4639	28.8635	/	/	/	/	/	/
151	PN-500-5p-8209	0.0672573	105.769	12.9608	76.3232	21.8429	63.0732	13.5052	59.5532	20.6688	/	/	/	0.0369498	/	/
152	ssc-miR-1	0.0683997	265.614	94.7459	57.3103	91.1987	6.57777	8.03527	6.85088	10.8701	/	/	/	/	/	/
153	ssc-miR-195	0.074746	42.9928	9.07027	36.6349	15.7183	87.6907	39.3652	97.2717	57.6593	/	/	/	/	/	/
154	PC-3p-28844	0.0754448	16.138	21.1153	9.13287	5.76364	7.46067	4.92978	60.861	47.1858	/	/	0.0329703	/	0.0449822	/
155	PN-383-5p-1411	0.0756999	32.0608	8.24868	14.5892	9.52468	13.9379	3.6013	14.3416	3.00636	/	/	/	0.0303702	/	0.0248327
156	miR-126-5p-1328	0.0759174	66.2302	5.69794	34.0506	12.7394	39.6188	16.0584	45.6064	9.54074	/	/	/	/	/	/
157	miR-210-5p-32608	0.0774147	36.193	5.56075	51.2833	14.8892	57.4572	3.67849	56.4838	13.3023	/	/	/	0.0401736	/	/
158	PN-7-3p-8724	0.078214	30.0781	6.2656	39.9836	11.7772	58.1179	14.5037	54.0551	17.5117	/	/	/	0.0358345	/	/
159	PC-5p-32513	0.0818738	46.9865	34.3674	70.4539	14.3166	114.594	17.8837	60.3884	9.77326	/	/	0.0168038	/	/	/
160	PN-1842-5p-9566	0.0853363	42.8793	6.55546	55.6636	12.4436	65.1673	6.0822	67.0762	17.8503	/	/	/	0.0279246	/	/
161	PC-3p-33106	0.0866926	86.9471	18.3077	183.827	80.1508	138.426	42.722	131.723	25.0791	/	/	/	/	/	/
162	miR-324-3p-38854	0.088462	30.7643	8.02931	49.5117	10.0763	50.7807	15.4875	49.1093	9.56121	/	/	/	/	/	/
163	PN-195-5p-30300	0.0927525	60.3852	15.7896	54.4339	32.5074	121.363	59.3752	137.976	58.3829	/	/	/	/	/	/
164	miR-155-5p-11894	0.0956795	84.8658	41.4107	123.164	35.7092	215.922	19.0922	172.172	91.473	/	/	/	/	/	/
165	PC-3p-42894	0.0987339	21.9908	3.1449	17.0417	5.09343	14.5886	7.13408	32.4839	10.1654	/	/	/	/	/	/
166	PN-429-3p-16007	0.0989889	50.9698	18.2739	106.124	78.2357	160.897	29.0941	188.791	51.099	/	/	/	0.0460714	/	0.0184021
Following transcripts are statistically insignificant (p-value >0.1) but have high signals (signal ≥ 500)
167	PC-3p-45009	0.472546	28552.9	2474.04	44853.5	11472.9	31214.7	11116.1	31171.6	20254.8	/	/	/	/	/	/
168	PC-3p-8280	0.344539	27529.2	1726.78	43861.9	9411.07	32581.2	12771	27225	19279.7	/	/	/	/	/	/
169	PN-1826-3p-701	0.86251	16687.9	2420.47	25836	13985.4	19489.3	6783.3	20601.6	8547.25	/	/	/	/	/	/
170	PN-2134-3p-3545	0.62615	14663.7	1595.48	17672.2	9135.74	20915.1	926.83	18761.9	4844.01	/	/	/	0.032467	/	/
171	PC-3p-39857	0.423566	11612.4	1785.41	17678.1	12920.7	7480.96	2375.69	10635.8	8576.08	/	/	/	/	/	/
172	PN-1937b-5p-17039	0.50844	11512.2	2338.59	9025.38	8124.08	6209.86	2908.6	7354.64	3333.34	/	/	/	/	/	/
173	miR-2904-5p-20636	0.37134	11478.1	3180.09	10443	9406.13	19222.1	4302.91	12005.7	6155.06	/	/	/	/	/	/
174	PC-3p-27055	0.86176	10868.1	4730.72	11240.7	5442.45	7884.48	761.721	8745.32	4015.64	/	/	/	/	/	/
175	PN-2478-3p-31772	0.488977	6360.6	1149.41	3864.38	1506.23	5779.66	3001.55	4484.25	1120.11	/	/	/	/	/	/
176	PN-2138-5p-36627	0.762041	6280.03	1519.86	6801.82	3768.2	8002.81	1468.36	6324.1	984.234	/	/	/	/	/	/
177	PN-7a-5p-541	0.272052	5732.51	1920.06	7990.83	5644.81	8667.1	1981.84	11755.4	3813.59	/	/	/	/	/	/
178	miR-7a-5p-430	0.252918	4902.95	1637.46	6422.18	4512.24	7782.78	1845.86	9871.68	2960.89	/	/	/	/	/	/
179	PC-5p-44440	0.539929	4656.88	2258.94	4812.42	2179.9	3168.99	267.796	2948.52	201.112	/	/	/	/	/	/
180	ssc-miR-92a	0.111836	4461.84	357.103	4688.97	872.543	4957.09	355.798	3837.77	228.448	/	/	0.018785	/	/	/
181	miR-149-3p-13400	0.758334	4240.43	1564.2	6230.02	5124.96	5588.94	1560.21	3398.57	1243.64	/	/	/	/	/	/
182	ssc-let-7a	0.382035	3947.68	1512.72	5096.83	4001.4	6456.34	2171.51	7806.69	2906.07	/	/	/	/	/	/
183	PN-720-5p-9742	0.481194	3415.66	708.893	6383.45	5947.57	2571.97	793.265	2773.93	1531.44	/	/	/	/	/	/
184	miR-7d-5p-35	0.224319	3154.95	1287.05	4748.21	3609.62	6466.09	1646.79	6763.84	2221.79	/	/	/	/	/	/
185	ssc-miR-574	0.813141	3032.55	792.141	3281.37	2954.34	3165.83	1878.11	1951.47	529.817	/	/	/	/	/	/
186	PC-3p-41498	0.475387	2922.47	609.216	4587.98	3075.08	4106.31	1244.47	2749.5	576.491	/	/	/	/	/	/
187	ssc-miR-205	0.252779	2805.24	1541.01	2466.15	1405.46	3592.36	273.4	5370.51	1967.46	/	/	/	/	/	/
188	miR-92a-3p-56231	0.628577	2750.83	233.103	1499.51	1567.34	2514.21	1962.85	1904.31	314.509	/	/	/	/	/	0.0368367
189	PN-3596-5p-30871	0.347435	2576.61	1121.15	3156.79	2624.22	5096.04	1952.65	5191.14	2382.03	/	/	/	/	/	/
190	miR-7f-5p-692	0.148037	2523.96	1180.89	4198.78	3566.95	5584.17	1773.33	7255.57	2457.2	/	/	/	/	/	/
191	ssc-let-7c	0.387731	2344.04	868.242	3446.84	2355.6	4152.49	1482.73	4712.49	1893.59	/	/	/	/	/	/
192	ssc-miR-191	0.725657	2249.01	129.539	2214.41	818.536	2092.26	48.3982	2513.65	454.096	/	/	/	/	/	/
193	ssc-miR-24	0.291012	2199.57	159.869	2731.53	590.014	2764.76	563.558	3143.98	705.513	/	/	/	/	/	/
194	ssc-let-7f	0.182539	2038.06	1029.71	3547.61	3460.03	4753.77	1816.79	6215.59	2164.38	/	/	/	/	/	/
195	PN-25-3p-43	0.307462	1890.82	110.441	1912.84	691.631	2749.65	780.991	1946.58	131.713	/	/	/	/	/	/
196	ssc-let-7i	0.109843	1878.55	795.68	2902.19	2061.01	4209.96	822.258	4407.45	1079.44	/	/	/	/	/	0.049346
197	ssc-let-7e	0.818178	1874.73	463.285	1504.86	1126.26	1935.58	937.527	1566.08	649.304	/	/	/	/	/	/
198	miR-21-5p-44	0.580828	1745.51	940.104	2157.22	359.354	1599.78	266.807	1767.19	241.411	/	/	/	/	/	/
199	PC-7g-5p-3653	0.210453	1650.19	592.25	2213.56	2003.98	3430.42	1118.92	3956.97	885.54	/	/	/	/	/	0.0325602
200	miR-181c-5p-1684	0.141468	1620.49	323.709	1180.56	552.903	1256.74	339.483	2494.78	1108.51	/	/	/	/	/	/
201	ssc-miR-361-5p	0.167358	1575.77	386.898	1178.1	227.888	1222.32	129.704	1080.67	153.66	/	/	/	/	/	/
202	miR-182-5p-1627	0.462677	1527.6	287.459	1812.12	1164.88	2488.25	45.4987	2228.35	744.191	/	/	/	0.0460367	/	/
203	PC-3p-25529	0.559362	1492.67	865.815	2497.85	1573.29	918.72	97.6935	1753.48	1486.61	/	/	/	/	/	/
204	ssc-miR-151-5p	0.403594	1443.04	51.99	1220.39	336.901	1184.12	118.726	1547.2	405.306	/	/	/	/	/	/
205	PC-7e-5p-58372	0.503236	1410.54	388.968	966.551	671.624	1164.63	439.276	872.401	267.974	/	/	/	/	/	/
206	miR-16-5p-29943	0.331921	1356	175.65	1195.26	586.935	1445.09	179.97	1806.11	106.728	/	/	/	/	/	/
207	PC-5p-49283	0.530667	1286.42	332.421	2760.48	2921.36	2561.55	1489.14	1254.61	416.865	/	/	/	/	/	/
208	ssc-miR-16	0.334417	1278.36	77.8725	1071.17	622.06	1396.11	183.234	1689.76	124.905	/	/	/	/	/	0.0152604
209	ssc-miR-127	0.115751	1270.51	80.6133	1864.66	1913.92	745.812	78.0252	501.269	42.6919	/	/	0.0148175	0.00460821	/	0.000644196
210	PC-3p-19163	0.191826	1238.84	557.062	2136.1	1365.92	734.732	148.444	1240.8	499.64	/	/	/	/	/	/
211	ssc-miR-455	0.219699	1216.54	125.929	1186.42	1015.9	521.192	117.71	748.211	275.818	/	/	/	0.0255895	/	/
212	miR-145-5p-234	0.347426	1214.87	83.4913	1187.81	738.075	711.355	56.1902	933.49	354.691	/	/	/	0.003143	/	/
213	PN-494-3p-3917	0.441235	1196.48	1200.56	2699.58	3811.48	4080.63	2056.73	1657.56	1821.55	/	/	/	/	/	/
214	PN-151-5p-5539	0.251109	1171.22	48.518	890.986	324.318	917.392	67.6637	1174.89	252.388	/	/	/	0.0157353	/	/
215	ssc-miR-15b	0.236149	1148.2	353.716	1370.98	840.381	2545.56	367.426	1748.72	672.288	/	/	/	/	/	/
216	ssc-miR-92b	0.369215	1121.21	175.315	999.038	433.21	1439.91	502.043	869.203	287.168	/	/	/	/	/	/
217	ssc-miR-27b	0.189436	1047.98	123.538	1257.44	712.651	1680.54	130.34	1994.21	399.508	/	/	/	0.00999359	/	0.0179637
218	PN-203-3p-308	0.202972	1019.73	780.854	932.001	376.533	423.206	53.0947	427.517	101.774	/	/	/	/	/	/
219	PC-5p-46964	0.113062	965.783	325.116	1806.54	762.349	749.47	302.423	840.348	402.503	/	/	/	/	/	/
220	ssc-miR-145	0.440214	965.263	95.6005	841.956	426.192	630.545	56.562	783.787	290.761	/	/	/	0.0122603	/	/
221	ssc-let-7g	0.156246	958.656	270.791	1445.48	1336.12	2421.61	752.511	2752.81	850.492	/	/	/	0.0387586	/	0.0210344
222	ssc-miR-423-5p	0.438604	955.11	333.373	1225.58	374.108	916.875	113.363	768.366	354.41	/	/	/	/	/	/
223	PC-3p-53437	0.502516	948.798	287.136	1785.71	1577.23	1677.3	782.676	940.759	156.037	/	/	/	/	/	/
224	miR-2140-5p-46938	0.699306	940.344	293.858	1429	689.464	918.641	365.271	1032.74	434.657	/	/	/	/	/	/
225	ssc-miR-17-5p	0.680577	939.285	235.015	938.751	478.527	912.812	103.011	698.939	71.7437	/	/	/	/	/	/
226	PC-5p-41107	0.109257	831.477	188.325	690.578	250.454	1025.54	454.952	406.408	239.427	/	/	/	/	/	/
227	PC-5p-10248	0.371755	769.476	319.057	1774.74	913.116	1095.38	352.463	1003.03	628.876	/	/	/	/	/	/
228	miR-221-3p-121	0.164177	739.891	123.784	612.942	230.485	554.263	60.8354	476.122	64.2539	/	/	/	/	/	0.0357707
229	miR-149-5p-11097	0.46611	736.519	122.077	807.977	337.71	557.62	77.2469	675.461	128.418	/	/	/	/	/	/
230	miR-27a-3p-1818	0.231485	732.664	46.8667	758.407	407.588	1100.63	171.159	1192.97	303.086	/	/	/	/	/	/
231	PC-5p-36531	0.414688	731.083	192.179	1569.72	1498.16	1381.7	767.525	689.825	170.961	/	/	/	/	/	/
232	ssc-miR-1285	0.725406	719.726	170.473	1088.79	801.631	1146.61	283.08	821.219	177.905	/	/	/	/	/	/
233	PN-1827-3p-10407	0.16583	704.888	437.603	1501.96	1602.29	2783.78	1194.01	2806.85	1468.21	/	/	/	/	/	/
234	PC-3p-30961	0.720779	668.61	334.771	769.425	423.279	423.756	58.8973	625.998	422.851	/	/	/	/	/	/
235	PC-5p-57957	0.486844	646.936	194.309	1095.33	689.377	669.775	301.86	462.542	126.984	/	/	/	/	/	/
236	miR-106a-5p-29928	0.554623	643.21	95.0652	631.143	366.124	714.267	42.9133	454.761	37.9378	/	/	0.00477148	/	/	0.0372316
237	PN-1274b-5p-339	0.471129	579.127	116.855	1178.67	1141.62	494.82	68.203	403.869	250.848	/	/	/	/	/	/
238	ssc-miR-106a	0.607159	569.824	87.9713	569.628	368.409	638.531	25.1139	407.615	31.5223	/	/	0.00280259	/	/	/
239	PN-93-5p-107	0.865179	543.996	54.7296	724.429	346.212	674.232	115.72	636.262	166.412	/	/	/	/	/	/
240	PC-3p-51289	0.487409	529.784	246.462	749.441	505.499	318.761	14.5649	517.711	290.535	/	/	/	/	/	/
241	miR-2887-5p-29252	0.395985	520.891	70.8965	1266.87	709.004	931.644	489.165	855.647	334.689	/	/	/	/	/	/
242	ssc-miR-130a	0.243894	511.116	138.096	308.115	155.248	376.24	107.41	284.283	90.7959	/	/	/	/	/	/
243	ssc-miR-130b	0.230212	490.455	69.826	401.849	132.958	349.795	46.6448	344.875	67.7487	/	/	/	/	/	/
244	PC-5p-54435	0.36527	479.969	119.289	1147.29	651.267	615.908	285.768	522.944	356.31	/	/	/	/	/	/
245	PC-5p-16513	0.401491	473.624	232.547	844.149	533.406	328.329	75.4996	476.396	231.458	/	/	/	/	/	/
246	PC-5p-52539	0.420742	472.272	222.328	853.157	551.245	341.728	89.0629	475.405	233.727	/	/	/	/	/	/
247	ssc-miR-181c	0.224565	454.743	238.084	313.344	157.972	333.829	124.738	899.378	740.941	/	/	/	/	/	/
248	miR-342-3p-3575	0.997519	452.332	49.68	499.7	231.563	461.489	32.7683	455.587	53.4996	/	/	/	/	/	/
249	ssc-miR-27a	0.273847	447.651	38.9206	410.225	221.916	716.526	355.602	806.727	222.278	/	/	/	/	/	/
250	miR-218-5p-53526	0.340338	432.261	49.7713	277.709	212.243	387.955	90.0387	216.025	135.393	/	/	/	/	/	/
251	PN-106b-5p-439	0.407082	402.834	16.2764	375.941	188.186	299.633	42.3762	259.033	34.6909	/	/	/	/	/	0.0294585
252	ssc-miR-342	0.48266	372.116	35.2928	395.118	131.38	466.476	60.1651	395.977	14.7465	/	/	/	/	/	/
253	PC-3p-30694	0.587343	358.78	172.218	951.07	716.697	374.212	144.11	460.54	420.244	/	/	/	/	/	/
254	PN-1274b-5p-24235	0.591733	349.734	71.1192	1323.9	1351.58	511.39	144.166	323.326	197.405	/	/	/	/	/	/
255	PC-3p-56303	0.336558	346.365	91.8579	780.196	527.77	519.171	274.864	350.257	122.617	/	/	/	/	/	/
256	miR-505-3p-3920	0.348264	332.141	78.5112	327.501	88.2755	310.924	35.4479	252.164	19.6278	/	/	/	/	/	/
257	miR-183-5p-749	0.310906	314.08	96.7454	383.882	277.377	662.542	41.304	399.529	96.0544	/	/	/	/	/	/
258	ssc-miR-152	0.113453	303.868	25.2886	197.165	100.488	290.498	65.6571	376.219	84.7492	/	/	/	/	/	/
259	PC-5p-53953	0.470582	300.034	64.6392	751.757	767.533	696.272	421.459	353.405	119.989	/	/	/	/	/	/
260	PN-25-3p-13660	0.574476	281.874	28.5796	226.7	242.602	484.096	337.321	364.302	142.545	/	/	/	/	/	/
261	PC-3p-36835	0.214999	230.914	38.5273	440.128	242.058	304.516	119.521	191.721	35.1888	/	/	/	/	/	/
262	ssc-miR-183	0.305337	204.103	75.1612	264.224	199.426	526.234	71.9875	273.979	120.008	/	/	/	/	/	/
263	miR-181a-5p-39048	0.125689	138.224	51.3617	43.1411	13.0914	207.769	185.566	374.238	318.478	0.0262371	/	/	/	/	/
264	PN-1271-5p-24855	0.111574	298.819	29.2517	403.456	51.3456	441.443	42.2516	571.959	227.185	0.0485311	/	/	0.0148812	/	/
Following transcripts are statistically insignificant (p-value > .1) and have low signals (signal < 500)
265	ssc-miR-505	0.390839	293.261	65.4048	305.877	77.0961	290.835	31.2686	235.315	34.4229	/	/	/	/	/	/
266	ssc-miR-185	0.306421	267.612	20.1543	204.723	70.2704	191.46	29.1827	241.523	55.2217	/	/	/	/	/	/
267	miR-20b-5p-17250	0.268804	259.814	30.0992	247.497	141.497	299.292	32.4336	152.116	20.9398	/	/	0.00644802	/	/	0.0129931
268	miR-28-5p-30328	0.489658	253.547	35.1046	194.707	105.381	251.301	79.5644	273.892	65.2419	/	/	/	/	/	/
269	PC-296-3p-9208	0.108324	250.132	56.1483	423.881	83.1416	313.422	89.0603	262.605	82.9306	/	/	/	/	/	/
270	ssc-miR-20	0.596526	223.703	35.9603	274.048	222.661	348.7	17.2692	161.206	93.5226	/	/	/	0.0468532	/	/
271	ssc-miR-1306-5p	0.378099	216.596	89.2071	273.848	93.5667	307.328	75.7484	195.57	62.3122	/	/	/	/	/	/
272	ssc-miR-151-3p	0.185348	213.162	48.3586	187.872	67.4196	289.841	43.1503	257.627	39.5104	/	/	/	/	/	/
273	miR-130b-5p-1805	0.52019	212.031	30.8963	234.716	64.6887	260.394	38.1462	222.302	5.58733	/	/	/	/	/	/
274	ssc-miR-221	0.456868	207.49	96.4888	167.586	119.105	285.814	50.5633	148.8	111.866	/	/	/	/	/	/
275	PN-7-5p-18300	0.841128	185.283	62.2083	227.456	190.543	163.25	26.6331	133.118	19.5855	/	/	/	/	/	/
276	ssc-miR-676	0.647279	165.253	19.4362	231.248	177.518	244.518	42.4283	158.652	16.762	/	/	0.0402616	/	/	/
277	PN-381-3p-1991	0.129031	158.93	32.8991	127.658	86.9877	83.1264	12.9653	67.6221	14.5464	/	/	/	0.0216835	/	0.0168035
278	miR-451-5p-792	0.589712	153.939	30.9274	222.688	98.4893	219.725	105.305	254.689	101.131	/	/	/	/	/	/
279	miR-148b-3p-24917	0.171087	151.482	43.2536	142.265	35.339	171.461	5.48918	212.548	46.2731	/	/	/	/	/	/
280	PC-5p-44729	0.484115	150.974	23.838	329.71	316.189	339.421	136.462	211.505	53.1644	/	/	/	/	/	/
281	ssc-miR-425-5p	0.23207	147.71	9.61455	145.747	21.4501	149.243	26.1985	193.588	48.3398	/	/	/	/	/	/
282	ssc-miR-532-5p	0.109871	141.555	14.9476	112.845	56.0701	70.2988	10.5326	82.9486	20.4157	/	/	/	0.00697456	/	/
283	ssc-miR-331-3p	0.294893	137.29	6.88879	217.615	30.0556	186.913	52.6481	230.197	125.764	0.0319291	/	/	/	/	/
284	PN-411-3p-3887	0.162292	131.511	32.0404	84.6714	62.7218	77.6667	34.0186	47.2196	28.3901	/	/	/	/	/	/
285	PC-3p-49285	0.216133	131.291	31.5714	215.959	40.5654	145.312	45.7653	138.669	46.5981	/	/	/	/	/	/
286	ssc-miR-21	0.452609	131.219	92.4772	105.34	56.7151	234.801	107.8	159.909	107.111	/	/	/	/	/	/
287	PC-5p-55329	0.820854	130.068	62.3353	177.651	95.1903	117.395	81.7449	184.801	137.304	/	/	/	/	/	/
288	PC-5p-48980	0.270044	129.431	45.5744	219.58	76.2507	126.567	29.8989	148.194	53.5466	/	/	/	/	/	/
289	PC-3p-40159	0.916579	127.386	68.2087	175.628	100.182	162.046	84.9904	135.011	61.4204	/	/	/	/	/	/
290	PC-3p-32678	0.170849	125.489	42.638	322.773	139.959	184.118	82.0642	246.279	103.04	/	/	/	/	/	/
291	PC-5p-43899	0.461967	123.536	21.444	339.074	259.628	233.078	148.084	170.153	55.9564	/	/	/	/	/	/
292	PN-185-5p-50418	0.274776	121.258	39.7459	74.6764	23.1323	123.277	10.9281	99.1334	42.3518	/	/	/	/	/	/
293	PN-1385-3p-36413	0.477661	118.742	52.5526	189.792	72.0504	129.913	28.7575	121.994	31.996	/	/	/	/	/	/
294	ssc-miR-30a-5p	0.166502	118.346	24.3205	73.9866	31.1211	157.906	77.2797	182.604	75.7551	/	/	/	/	/	/
295	PN-379-3p-17668	0.12101	113.608	20.709	77.1562	49.4937	75.1478	25.6162	48.0819	10.9711	/	/	/	/	/	0.0128488
296	ssc-miR-744	0.442945	113.59	14.0755	159.554	63.0473	173.316	40.1287	153.94	40.9845	/	/	/	/	/	/
297	ssc-miR-378	0.50943	112.997	33.7913	153.34	79.0792	90.1132	19.2809	137.916	58.6788	/	/	/	/	/	/
298	miR-421-3p-5678	0.339488	112.667	15.4	82.9038	36.7527	73.2091	16.7687	77.3723	13.6473	/	/	/	/	/	/
299	ssc-miR-324	0.331462	112.319	11.6604	121.471	9.52313	95.4001	14.1507	144.415	52.192	/	/	/	/	/	/
300	PC-5p-41031	0.312799	106.806	21.8043	322.359	327.46	303.292	148.973	170.48	69.1238	/	/	/	/	/	/
301	PC-5p-2320	0.76964	106.374	13.3791	120.738	34.2686	123.965	28.7626	134.524	44.7934	/	/	/	/	/	/
302	miR-296-3p-176	0.422979	105.164	14.1689	139.485	53.7136	112.875	26.4618	91.7617	22.9673	/	/	/	/	/	/
303	PC-3p-58208	0.469209	104.31	16.3023	239.365	203.354	235.463	112.242	151.465	43.5113	/	/	/	/	/	/
304	PC-3p-54511	0.263056	102.824	14.8976	255.012	197.592	237.547	123.534	162.779	39.5851	/	/	/	/	/	/
305	ssc-miR-1307	0.606988	96.7799	27.7904	113.279	55.5173	123.613	5.51143	155.349	80.3522	/	/	/	/	/	/
306	miR-1307-3p-821	0.344953	90.9707	23.8477	121.017	8.36568	105.534	6.87932	141.864	57.6586	/	/	/	/	/	/
307	ssc-miR-193a-5p	0.539455	87.3614	20.3196	93.6354	29.1825	72.745	19.5589	69.1404	22.9062	/	/	/	/	/	/
308	PN-106b-3p-1913	0.167019	86.3673	14.7719	133.565	47.5976	138.288	26.7997	120.963	13.5983	/	/	/	/	/	/
309	PC-5p-53415	0.176537	84.7412	5.05794	201.48	108.574	146.191	59.4899	122.117	19.882	/	/	/	/	/	/
310	ssc-miR-504	0.693556	84.2227	11.2978	64.9432	13.4804	67.0146	10.7269	69.5185	44.8861	/	/	/	/	/	/
311	PN-15a-5p-24695	0.515191	83.8775	7.22383	95.5411	54.3021	138.073	10.5331	129.882	83.934	/	/	/	0.00497037	/	/
312	miR-339-5p-24465	0.67485	83.6146	34.0799	119.658	26.994	100.939	40.6193	126.676	78.2399	/	/	/	/	/	/
313	miR-218-5p-18206	0.826618	81.1881	69.7291	144.028	242.502	176.265	152.071	190.027	321.014	/	/	/	/	/	/
314	ssc-miR-339	0.575829	80.7317	31.7065	116.261	22.5695	97.4419	43.397	129.112	75.7133	/	/	/	/	/	/
315	PC-5p-32379	0.222019	78.6351	23.3155	175.924	117.137	161.989	74.8378	136.893	34.062	/	/	/	/	/	/
316	miR-505-5p-1305	0.31592	77.9138	16.4459	54.2737	40.6444	71.6557	26.8784	39.0909	3.90602	/	/	/	/	/	0.0347464
317	miR-122-5p-1298	0.185126	76.3445	95.2128	24.4808	22.2139	11.378	5.11456	11.0472	5.30538	/	/	/	/	/	/
318	miR-125b-3p-8757	0.141697	75.4967	14.519	71.8314	27.6335	65.4468	10.8294	45.3326	9.73891	/	/	/	/	/	/
319	PC-5p-33677	0.125857	74.7389	12.2987	170.927	67.0945	126.675	51.3096	124.897	44.992	/	/	/	/	/	/
320	PC-3p-48110	0.162353	74.0679	14.0093	191.747	107.718	140.474	60.9587	119.133	59.6742	/	/	/	/	/	/
321	PN-484-5p-2677	0.271127	72.5031	12.1187	122.302	32.1522	90.4529	38.5669	98.1281	25.8929	/	/	/	/	/	/
322	ssc-miR-328	0.605947	71.4043	4.51228	79.6647	10.7414	69.3222	23.4719	93.6085	38.8522	/	/	/	/	/	/
323	PC-3p-48957	0.249694	71.2302	18.109	144.187	62.1268	97.2946	11.668	128.616	65.062	/	/	/	/	/	/
324	PC-5p-58681	0.61312	70.9275	12.7948	99.7843	37.4559	84.9312	27.2336	89.0761	17.229	/	/	/	/	/	/
325	PN-1959-5p-58783	0.469593	68.7812	46.1862	54.9618	28.9774	90.7692	23.758	49.5789	23.7119	/	/	/	/	/	/
326	miR-146a-5p-5923	0.286258	68.5594	12.7578	157.802	104.315	80.7075	14.2506	68.7867	2.18075	/	/	/	/	/	/
327	ssc-miR-532-3p	0.358833	67.7258	19.2608	56.0056	31.9363	91.736	31.3478	54.959	13.0316	/	/	/	/	/	/
328	PC-3p-46523	0.288982	64.329	24.4867	147.715	89.5239	115.285	28.6473	129.072	75.8028	/	/	/	/	/	/
329	miR-493-5p-3333	0.100988	63.3686	42.1866	31.9025	12.4064	41.1525	4.53649	19.4915	15.5576	/	/	/	/	/	/
330	PN-652-3p-1849	0.531997	61.9232	19.51	52.4745	14.2707	52.808	11.2512	70.6117	18.4805	/	/	/	/	/	/
331	PC-7c-5p-34268	0.482334	61.0021	20.3496	68.9334	46.3283	206.621	169.191	146.887	108.595	/	/	/	/	/	/
332	miR-2320-5p-8854	0.84918	60.9435	6.1243	72.3325	3.71447	71.1607	17.7365	69.3998	31.3812	/	/	/	/	/	/
333	PN-1274a-5p-54245	0.225923	58.9171	10.9134	179.968	167.858	73.5889	16.2726	51.0072	30.5787	/	/	/	/	/	/
334	miR-138-3p-3259	0.518542	56.6443	13.6531	75.846	33.9654	85.4339	20.7184	88.9549	40.3102	/	/	/	/	/	/
335	PN-758-3p-29208	0.177266	55.5641	6.78192	42.1119	15.6832	23.9882	4.53125	56.2528	44.4409	/	/	/	0.00758202	/	/
336	miR-132-3p-16295	0.286797	55.0077	8.67	46.8335	24.9384	33.7968	2.17739	35.0711	8.24473	/	/	/	0.0398208	/	/
337	PC-3p-58149	0.457458	51.6717	21.1955	40.8588	18.9605	45.8287	11.567	77.9737	40.2292	/	/	/	/	/	/
338	miR-138-5p-826	0.527887	51.5703	4.79983	90.1574	57.1364	83.3267	14.1602	81.5802	25.2463	/	/	/	0.0267363	/	/
339	PC-15a-5p-46278	0.266503	50.6563	5.61718	40.945	20.7612	79.0304	32.9701	79.1611	39.6673	/	/	/	/	/	/
340	PN-362-5p-2229	0.424836	50.0302	11.683	46.204	26.7756	31.0266	12.3163	30.8076	1.84641	/	/	/	/	/	/
341	miR-206-3p-33411	0.236122	49.5291	11.5474	38.9853	53.8348	13.418	10.6688	9.17864	12.4378	/	/	/	/	/	/
342	miR-99b-3p-543	0.176998	49.196	6.68593	40.1961	11.4732	39.365	11.4394	29.2969	5.24224	/	/	/	/	/	0.0311843
343	PC-5p-47796	0.182804	49.1378	19.954	133.832	86.2269	51.5436	21.2512	96.131	52.7583	/	/	/	/	/	/
344	miR-342-5p-4956	0.458469	47.8848	10.5395	48.5785	18.3043	59.017	8.03511	39.9208	15.7225	/	/	/	/	/	/
345	PC-138-5p-9675	0.747834	47.7145	6.59501	79.7931	52.0744	67.6036	10.8758	59.185	13.8877	/	/	/	/	/	/
346	miR-1-3p-9331	0.147725	46.5785	6.22723	18.8343	22.4124	5.04634	4.74101	3.95432	3.23066	/	/	/	/	/	0.0342504
347	PN-382-3p-1007	0.756644	45.8943	12.1652	33.1911	16.1829	43.6165	6.19579	44.6319	28.7612	/	/	/	/	/	/
348	ssc-miR-28-3p	0.254888	44.0541	19.4927	45.8317	39.0644	108.777	18.495	82.0167	63.8815	/	/	/	/	/	/
349	ssc-miR-15a	0.79032	43.9995	4.61435	39.6799	20.2643	58.0643	31.7372	51.9001	22.8727	/	/	/	/	/	/
350	PC-5p-48616	0.670137	43.785	15.2103	83.4709	46.0535	72.5677	37.3003	72.431	49.2506	/	/	/	/	/	/
351	ssc-miR-148b	0.305486	43.5603	6.02413	32.035	25.1999	53.2599	13.1536	46.9168	15.6512	/	/	/	/	/	/
352	PN-758-5p-11774	0.961913	42.3203	8.19405	47.0576	8.62164	42.3401	10.3983	56.7136	43.5495	/	/	/	/	/	/
353	miR-504-5p-623	0.529377	41.7516	12.7776	32.7431	15.6731	46.5042	11.447	35.1788	12.0343	/	/	/	/	/	/
354	PN-411-5p-771	0.345701	41.3962	7.93364	29.5097	16.094	26.2352	4.0013	22.7011	5.75598	/	/	/	/	/	0.0467446
355	PN-381-5p-15017	0.636479	41.0018	9.30189	39.8613	20.6987	30.5249	2.36843	30.5261	7.76037	/	/	/	/	/	/
356	miR-2483-3p-8160	0.104403	40.9497	13.5543	25.2863	5.65176	27.5137	7.20745	22.7261	3.59613	/	/	/	/	/	/
357	PN-501-3p-39962	0.275241	40.5046	6.52014	34.2111	11.8772	27.8213	4.34907	33.3561	2.28426	/	/	/	/	/	/
358	PC-5p-9764	0.429152	39.7113	47.3212	9.32975	2.03667	9.33445	4.33898	139.176	221.971	/	/	/	/	/	/
359	miR-1306-3p-16142	0.501185	39.4436	8.11963	51.0883	31.0101	67.371	12.9047	46.268	4.33984	/	/	/	0.0446892	/	/
360	miR-1308-3p-49420	0.918844	38.3504	6.93908	63.9662	37.675	64.6277	44.314	68.1137	73.1101	/	/	/	/	/	/
361	PN-500-3p-3905	0.503668	38.1091	10.6896	27.7033	6.21662	27.1992	3.3337	27.192	12.7158	/	/	/	/	/	/
362	PN-93-3p-1604	0.592324	37.531	3.02084	45.1614	19.2405	52.9655	11.0718	43.5739	7.12486	/	/	/	/	/	/
363	ssc-miR-22-3p	0.208763	36.8652	2.61536	28.9707	7.04841	29.0064	3.02058	60.5303	37.2703	/	/	/	0.0430507	/	/
364	PN-323-5p-6736	0.641892	36.2268	10.8074	37.4371	2.14825	38.4883	28.4238	25.2053	8.81754	/	/	/	/	/	/
365	miR-454-3p-9708	0.582773	35.9241	9.24245	42.846	26.6171	51.0677	15.4161	32.2886	26.4808	/	/	/	/	/	/
366	ssc-miR-19b	0.509468	35.2094	9.86564	53.4061	68.3277	69.2203	19.6313	27.3935	26.7646	/	/	/	/	/	/
367	ssc-miR-18	0.412298	34.8971	7.08264	27.6116	11.7889	23.4686	3.54143	23.2122	6.42184	/	/	/	/	/	/
368	PC-3p-33750	0.39003	34.7861	6.21289	35.4641	11.6969	46.8064	7.77128	44.3766	12.6859	/	/	/	/	/	/
369	PC-3p-7694	0.30099	34.614	10.3893	19.1306	9.72158	19.945	12.3903	28.8612	5.79674	/	/	/	/	/	/
370	PN-543-5p-14352	0.349348	34.5237	2.53855	22.8119	10.4188	19.3845	3.09876	89.6673	111.496	/	/	/	0.0288068	/	/
371	PN-410-5p-17791	0.461664	34.3165	36.6161	40.6193	57.7864	7.20843	1.9486	10.6216	4.16778	/	/	/	/	/	/
372	miR-23b-5p-427	0.278062	33.8338	0.905052	58.5707	36.3031	63.766	17.0137	49.0052	8.72683	/	/	/	/	/	/
373	PC-3p-37654	0.399215	33.5258	2.85255	40.0015	8.78982	33.0386	1.11029	41.1329	10.685	/	/	/	/	/	/
374	miR-7e-3p-28921	0.344878	33.5234	2.35492	30.8228	10.2709	23.0622	6.14809	27.8416	7.04395	/	/	/	/	/	/
375	ssc-miR-365	0.224332	32.351	14.0117	12.5971	3.38047	26.8703	16.5137	20.8681	5.90986	/	/	/	/	/	/
376	miR-125a-3p-38755	0.780218	31.9954	4.59507	27.8645	2.95666	32.7801	3.88515	31.1399	11.8315	/	/	/	/	/	/
377	miR-504-3p-35231	0.701379	31.8304	5.14915	35.1285	7.21966	30.9031	5.9111	29.8315	3.71773	/	/	/	/	/	/
378	PC-125b-5p-29588	0.706463	31.1323	7.24113	35.9809	5.31547	31.1925	2.30953	29.5949	10.965	/	/	/	/	/	/
379	miR-551a-3p-4326	0.290466	30.8722	3.12398	41.4074	13.5778	25.7575	3.62676	39.7151	15.8831	/	/	/	/	/	/
380	ssc-miR-374b	0.392117	30.8172	8.88052	22.4182	12.9562	31.1402	9.33652	19.9849	10.4162	/	/	/	/	/	/
381	miR-214-5p-15474	0.429842	29.7276	14.3496	21.9091	10.7549	27.8253	3.40417	18.2785	4.93839	/	/	/	/	/	/
382	PN-330-3p-177	0.140137	29.3206	4.23808	42.9984	14.2165	47.4108	5.78391	41.4426	7.22463	/	/	/	0.0201927	/	/
383	miR-92a-5p-52622	0.667819	28.6471	3.54356	32.7226	21.9981	32.0453	10.6963	18.2278	3.94146	/	/	/	/	/	0.045325
384	PN-193b-5p-4411	0.500779	28.0747	2.05427	19.4508	5.99147	25.1628	6.42152	29.5457	15.2477	/	/	/	/	/	/
385	miR-195-5p-6765	0.213228	28.0464	7.03889	24.5593	11.1385	51.707	13.0019	46.1997	32.2432	/	/	/	/	/	/
386	ssc-miR-224	0.174886	27.5332	15.7993	21.6246	29.5841	31.038	33.1032	3.35334	3.8099	/	/	/	/	/	/
387	miR-378-3p-21764	0.20169	27.0478	6.01568	18.0236	3.64244	26.574	6.65868	28.8494	8.24101	/	/	/	/	/	/
388	miR-205-3p-2188	0.961565	26.557	5.96888	29.2202	21.4731	28.203	5.20593	28.0891	1.40075	/	/	/	/	/	/
389	PC-3p-56517	0.356265	26.4917	6.62742	26.8038	11.4652	24.1008	6.54552	38.3113	11.2259	/	/	/	/	/	/
390	PN-200b-5p-2366	0.115569	26.201	7.47926	52.398	31.1801	102.516	14.2637	81.4309	57.0705	/	/	/	0.0200454	/	/
391	ssc-miR-27b*	0.785684	26.1883	3.26429	44.747	40.1983	45.1819	15.4689	34.2384	11.1824	/	/	/	/	/	/
392	miR-105-5p-32318	0.147467	26.0196	11.748	14.8964	11.1572	21.8182	5.69848	10.087	2.47174	/	/	/	/	/	/
393	PN-378-5p-25042	0.774239	25.7498	4.60847	30.5471	19.2793	24.6702	5.22143	33.8826	10.4533	/	/	/	/	/	/
394	miR-1983-3p-46851	0.244199	25.7453	3.20926	14.3323	5.86165	23.8222	10.4287	17.5623	8.49409	/	/	/	/	/	/
395	ssc-miR-1277	0.363638	25.517	38.4657	3.09143	1.91235	25.7369	34.9991	3.10915	1.43346	/	/	/	/	/	/
396	PC-3p-2582	0.109562	25.1721	8.67759	33.6712	9.43297	17.7103	3.34341	31.4135	7.89441	/	/	/	/	/	/
397	ssc-miR-186	0.76119	25.0138	9.12323	17.7404	13.5925	24.0136	12.8778	20.9957	11.7622	/	/	/	/	/	/
398	PC-5p-46602	0.845274	24.8724	4.77688	30.6775	11.5358	22.5728	2.17698	28.6296	15.9066	/	/	/	/	/	/
399	PC-3p-35429	0.998202	24.8094	7.43757	25.3668	12.2156	25.2452	6.28108	25.5814	9.37606	/	/	/	/	/	/
400	miR-105-5p-39093	0.62468	24.298	7.47252	25.2354	17.2253	34.8366	17.2288	71.9181	76.808	/	/	/	/	/	/
401	ssc-miR-363	0.190734	24.1891	9.65148	13.0563	6.28192	17.4512	5.5736	10.7509	4.7364	/	/	/	/	/	/
402	PC-5p-58510	0.11589	24.0326	5.26324	37.8991	8.67309	25.8059	5.68749	35.8006	10.3853	/	/	/	/	/	/
403	PC-3p-26099	0.195893	23.98	5.49857	49.7739	25.2904	39.2003	9.82201	38.586	12.9263	/	/	/	/	/	/
404	ssc-miR-345-5p	0.899656	23.913	7.00118	20.6657	7.35464	21.6975	7.73422	22.1113	19.8674	/	/	/	/	/	/
405	PC-5p-6028	0.507117	23.6122	10.6215	42.7834	26.2466	23.9654	12.3679	39.9506	24.2663	/	/	/	/	/	/
406	ssc-miR-425-3p	0.212279	23.6068	5.24122	35.5839	5.81965	23.6086	5.80632	29.8075	9.88914	/	/	/	/	/	/
407	ssc-miR-122	0.371502	23.4222	27.009	7.71859	4.60816	10.2279	2.492	5.60363	1.59151	/	/	/	/	/	/
408	PC-5p-41213	0.521517	23.0815	9.11521	24.0645	15.6455	11.9424	5.93444	14.8733	2.90516	/	/	/	/	/	/
409	PC-5p-53374	0.657059	22.5059	9.94949	17.9293	6.79475	16.0735	2.77343	28.1049	14.5108	/	/	/	/	/	/
410	ssc-miR-326	0.662039	22.2068	6.00871	30.8715	3.79203	37.189	11.617	40.9519	37.6762	/	/	/	/	/	/
411	PC-5p-42342	0.77134	22.1461	5.26927	22.7898	10.989	31.0772	11.5551	33.4058	21.227	/	/	/	/	/	/
412	ssc-miR-34a	0.650609	22.1219	4.96495	53.9041	61.0346	15.5324	2.68979	33.6209	32.9554	/	/	/	/	/	/
413	PC-5p-49827	0.854246	21.8344	8.27426	23.914	12.6226	27.1931	10.0591	28.5571	12.1737	/	/	/	/	/	/
414	PN-1357-5p-50913	0.10844	21.7174	5.31361	31.037	6.69897	50.443	11.0287	34.5931	16.948	/	/	/	0.0216148	/	/
415	PC-3p-55239	0.154131	21.6616	2.90131	30.1357	10.1741	28.6076	3.63707	38.0959	11.79	/	/	/	/	/	/
416	PN-487b-5p-28138	0.412334	21.6439	3.24416	25.8359	17.1917	17.3062	1.42188	14.3612	5.7694	/	/	/	/	/	/
417	PC-3p-29296	0.79342	21.6396	10.6853	25.9788	17.1138	35.7153	23.8563	37.7159	25.3446	/	/	/	/	/	/
418	ssc-miR-423-3p	0.19136	21.5193	6.63621	30.4216	4.09161	28.7528	6.97623	30.1025	4.19747	/	/	/	/	/	/
419	miR-182-3p-38717	0.453999	21.517	20.557	13.2276	6.97459	20.995	12.418	8.96225	2.3251	/	/	/	/	/	/
420	miR-96-5p-13194	0.43764	21.5168	1.42172	26.3862	15.4969	33.8417	4.50162	35.66	11.9581	/	/	/	0.0368984	/	/
421	miR-124-3p-1392	0.944524	21.4375	4.54523	18.0707	3.68986	20.7341	9.28867	20.8811	15.9443	/	/	/	/	/	/
422	PN-532-5p-23788	0.478752	21.2896	8.78184	19.3896	9.11836	23.7096	0.962756	29.0287	4.89182	/	/	/	/	/	/
423	miR-21-3p-58304	0.363607	21.1291	11.0479	14.6172	3.86258	15.2128	1.34163	11.743	4.05591	/	/	/	/	/	/
424	ssc-miR-30a-3p	0.228485	21.012	7.8638	15.1128	8.43599	33.0543	0.841853	18.6029	13.5842	/	/	/	/	/	/
425	PC-371-5p-22929	0.901582	20.6956	1.98094	26.633	13.9731	21.6911	7.02769	26.7925	11.4834	/	/	/	/	/	/
426	miR-449a-5p-16490	0.685853	20.2993	18.5571	12.2338	6.86605	9.81398	5.2447	59.6275	81.6384	/	/	/	/	/	/
427	PN-25-5p-584	0.668057	20.0619	3.25757	20.5278	6.0233	25.4258	6.2327	20.2103	6.98825	/	/	/	/	/	/
428	PN-486-5p-52346	0.558917	19.8868	0.768857	26.691	17.8956	17.6414	1.13124	25.6681	5.34485	/	/	/	/	/	/
429	miR-139-3p-9531	0.259883	19.7577	1.66738	26.2185	11.038	29.557	6.46742	32.5153	7.01388	/	/	/	/	/	/
430	ssc-miR-129	0.60663	19.7208	8.58899	141.966	218.971	13.1523	5.05453	34.6395	44.031	/	/	/	/	/	/
431	miR-34c-3p-39896	0.440388	19.6526	4.84395	27.0432	18.0215	33.9207	9.00983	27.5904	4.57692	/	/	/	/	/	/
432	PN-138b-3p-30491	0.703854	19.6467	11.553	12.5282	3.37799	14.4016	1.08935	23.8396	20.4571	/	/	/	/	/	/
433	miR-34b-3p-37237	0.760196	19.4745	8.37575	15.0656	5.81444	20.4824	5.74919	24.1252	13.3214	/	/	/	/	/	/
434	PC-5p-27556	0.699992	19.2973	2.49278	12.0218	11.6459	13.0448	4.88838	15.9957	16.4804	/	/	/	/	/	/
435	ssc-miR-7	0.472728	18.7576	8.48831	25.8987	34.802	49.5788	21.3048	20.8197	25.8868	/	/	/	/	/	/
436	miR-1307-5p-10307	0.199768	18.6841	2.78511	22.452	6.54041	27.5283	5.0498	25.1924	3.46558	/	/	/	/	/	/
437	PC-5p-52238	0.794066	18.4084	7.24417	23.2451	10.9532	16.1113	9.19453	20.9728	8.81238	/	/	/	/	/	/
438	PC-3p-28725	0.118447	18.2466	6.84335	13.7598	10.5073	10.1695	5.85857	31.1992	6.02893	/	/	/	/	/	/
439	ssc-miR-664-3p	0.764229	18.2401	2.97134	16.544	8.51416	24.995	14.9956	19.0736	6.7244	/	/	/	/	/	/
440	PN-1842-3p-46163	0.56918	18.1905	2.03387	17.768	5.91574	16.2515	1.9238	23.1299	9.739	/	/	/	/	/	/
441	PC-345-3p-22893	0.237137	17.7367	2.36243	32.6252	12.6392	21.2214	0.530722	26.5465	13.2782	/	/	/	/	/	/
442	ssc-miR-10b	0.38239	17.0557	13.4339	8.02746	1.39721	9.00125	3.23161	8.54818	1.44108	/	/	/	/	/	/
443	PN-377-3p-18696	0.920919	17.0458	8.51167	17.3216	12.4948	138.473	229.081	39.0745	33.099	/	/	/	/	/	/
444	miR-708-3p-18309	0.705237	16.9392	17.2966	6.35945	1.16604	10.203	8.30729	8.24161	1.61937	/	/	/	/	/	/
445	PC-5p-32141	0.699778	16.4518	2.33746	18.9504	16.8753	14.7132	5.94703	21.8774	3.46639	/	/	/	/	/	/
446	PN-223-3p-48223	0.456735	16.4196	12.5246	14.9143	3.37897	6.69476	6.92222	35.8824	47.4922	/	/	/	/	/	/
447	PC-5p-39068	0.432886	15.1672	3.12584	25.5762	12.4226	25.8507	7.28323	26.5415	11.4028	/	/	/	/	/	/
448	miR-204-3p-7373	0.434788	15.1514	7.5314	22.2491	13.179	26.4516	6.49697	19.6927	4.00915	/	/	/	/	/	/
449	miR-325-3p-52014	0.781223	15.1141	4.74032	13.6232	7.28818	18.965	4.30981	18.8896	12.8358	/	/	/	/	/	/
450	PC-3p-53455	0.882436	15.0195	6.55916	15.777	12.7923	14.9034	9.68809	22.3678	17.0761	/	/	/	/	/	/
451	PC-3p-40847	0.498976	15.0018	4.40873	22.1696	5.87262	19.8684	5.78421	23.6738	10.1126	/	/	/	/	/	/
452	PC-5p-56505	0.426767	14.6548	13.2011	10.5997	5.00646	6.19999	2.72372	26.384	28.2055	/	/	/	/	/	/
453	miR-129-5p-16749	0.388927	14.4728	5.25284	37.0579	31.4192	19.4398	3.61787	19.0658	8.54432	/	/	/	/	/	/
454	PC-5p-53739	0.299967	14.4206	6.02635	26.6118	11.4251	11.4851	6.49359	26.6937	22.6682	/	/	/	/	/	/
455	miR-7a-3p-22829	0.891517	14.2722	8.59754	8.66456	5.33185	21.0213	27.6493	7.91923	4.00784	/	/	/	/	/	/
456	PC-3p-40640	0.100892	14.1768	0.992198	19.3668	13.5778	33.1593	9.80799	22.4619	3.8959	/	/	/	0.041906	/	/
457	miR-491-5p-13995	0.430118	14.1659	3.35091	23.5808	11.5254	22.6503	6.92093	23.8523	9.48769	/	/	/	/	/	/
458	ssc-miR-30b-3p	0.120212	14.1044	4.8146	31.8464	10.5029	20.6709	4.50717	18.5851	9.92739	/	/	/	/	/	/
459	miR-365-5p-11544	0.949404	13.8374	1.18388	15.3456	4.72789	18.3025	6.84616	18.9086	14.9343	/	/	/	/	/	/
460	ssc-miR-935	0.171401	13.7852	0.904677	17.7633	4.62063	21.9093	2.74738	23.5949	10.8593	/	/	/	/	/	/
461	ssc-miR-628	0.62355	13.2183	7.37804	13.4729	8.98099	20.8525	11.4244	12.3631	13.7002	/	/	/	/	/	/
462	PC-5p-43364	0.109038	12.8452	2.81831	16.2064	3.65533	8.21736	3.61621	24.4807	17.7589	/	/	/	/	/	/
463	miR-142-5p-54139	0.260278	12.4531	9.22762	14.6182	8.71944	33.789	34.7602	6.29015	0.93969	/	/	/	/	/	/
464	PC-5p-58593	0.350015	12.3034	13.8428	5.78715	3.54974	4.03418	2.22073	41.0437	54.0931	/	/	/	/	/	/
465	PC-5p-51164	0.675332	12.2774	4.65741	14.6674	8.01964	10.7947	3.00599	19.4167	12.6513	/	/	/	/	/	/
466	PC-3p-35409	0.685498	12.1408	6.13978	22.7759	26.186	6.48981	2.25246	18.4794	18.6504	/	/	/	/	/	/
467	miR-219-3p-56939	0.767468	11.5315	0.731751	16.0502	1.77034	27.1601	23.3148	65.5142	97.6318	/	/	/	/	/	/
468	PN-3168-5p-14157	0.525352	11.4026	5.76586	19.0652	14.7028	14.1289	1.60034	30.1475	26.2556	/	/	/	/	/	/
469	PN-1197-3p-3514	0.953404	11.2337	3.95666	9.17632	4.56991	16.4447	14.3824	24.0216	32.6037	/	/	/	/	/	/
470	PC-3p-48419	0.326781	10.786	8.35368	97.0613	142.313	7.17678	1.49215	37.7207	50.1478	/	/	/	/	/	/
471	PN-509-5p-29637	0.268039	10.4204	1.63091	15.3119	4.61648	26.8922	23.0814	61.6278	72.4037	/	/	/	/	/	/
472	miR-181b-5p-34723	0.613164	10.2734	3.97007	17.59	13.1196	17.6437	8.46479	17.7534	6.88658	/	/	/	/	/	/
473	PC-3p-49234	0.143282	9.8245	3.58352	27.9601	13.5447	25.6728	17.5348	26.8506	8.62761	/	/	/	/	/	0.0330223
474	ssc-miR-9-1	0.358603	9.17832	3.81771	6.30558	5.17023	31.7161	41.0881	4.18905	1.63743	/	/	/	/	/	/
475	PC-5p-38663	0.341792	8.54926	3.09911	12.1222	10.6268	12.8355	6.6691	28.7353	25.9107	/	/	/	/	/	/
476	PC-5p-51903	0.272767	8.5397	3.03192	14.93	9.63457	20.2403	11.5033	22.6339	10.3747	/	/	/	/	/	/
477	PN-539-3p-9544	0.503467	8.07676	1.74766	6.71309	3.33546	25.1011	18.1099	22.7305	18.1103	/	/	/	/	/	/
478	PN-376c-5p-43489	0.704649	7.80071	2.82475	5.87282	1.58088	19.785	24.6532	55.8263	86.2816	/	/	/	/	/	/
479	PC-5p-6438	0.360611	7.61946	4.09233	86.8286	135.973	3.23387	2.2158	32.8803	47.6862	/	/	/	/	/	/
480	PC-3p-46977	0.412137	7.50414	0.363281	12.9874	4.75897	9.78617	6.70503	19.9346	17.8302	/	/	/	/	/	/
481	PC-3p-5588	0.988873	7.42905	2.71252	72.3235	117.966	7.38153	2.0747	9.48653	5.57777	/	/	/	/	/	/
482	PC-3p-18428	0.675662	5.26034	1.34164	28.004	39.257	8.41358	7.24798	14.5713	14.043	/	/	/	/	/	/
483	PN-590-3p-56007	0.543628	3.91606	3.2095	5.22449	1.15033	13.8978	18.4104	43.6239	66.5094	/	/	/	/	/	/
484	PC-5p-58697	0.750246	3.69629	2.36228	3.46349	3.11816	62.143	104.974	151.229	254.794	/	/	/	/	/	/
