# Supplementary material for: MicroRNAome and Expression Profile of Developing Tooth Germ in Miniature Pigs
Source: PLoS One. 2012 Dec 18;7(12):e52256. doi: 10.1371/journal.pone.0052256 (PMC3525553; doi:10.1371/journal.pone.0052256)
Supplement: Table S5 — Significant miRNA expression patterns. (XLS) [file pone.0052256.s009.xls]

## Sheet: genemodelfile
Table 5 Significant miRNA expression patterns
probe_id	Target Sequence (5' to 3')	35day	45day	50day	60day	profile number	pig_miRNA	human_miRNA	mouse_miRNA
ssc-miR-1	TGGAATGTAAAGAAGTATGTA	0	-4.0081	-6.34042	-6.11555	25	ssc-miR-1	hsa-miR-1	mmu-miR-1a
miR-1-3p-9331	TAGAATGTAAAGAAGTATGTAT	0	-1.81146	-3.56775	-3.18136	25	ssc-miR-1	hsa-miR-1	mmu-miR-1a
PN-1-3p-13186	TGGAATGTAAGGAAGTGTGTAT	0	-3.80945	-5.16745	-6.28795	25	ssc-miR-206	hsa-miR-206	mmu-miR-206
PN-7e-5p-4024	TGAGGTAGTAGATTGAATAGTT	0	1.13027	3.86673	2.70944	2	new	hsa-let-7f	mmu-let-7f
PC-7f-3p-54949	GAGGTAGTAGATTGTATACTT	0	1.33327	4.02404	2.73442	2	ssc-let-7f	hsa-let-7f	mmu-let-7f
ssc-miR-99b	CACCCGTAGAACCGACCTTGCG	0	-1.36449	-0.917569	-1.81428	23	ssc-miR-99b	hsa-miR-99b	mmu-miR-99b
ssc-miR-125b	TCCCTGAGACCCTAACTTGTGA	0	-1.19826	-1.13908	-1.6409	23	ssc-miR-125b	hsa-miR-125b	mmu-miR-125b-5p
ssc-miR-127	TCGGATCCGTCTGAGCTTGGCT	0	-0.430867	-0.627305	-1.92015	23	ssc-miR-127	hsa-miR-127-3p	mmu-miR-127
ssc-miR-128	TCACAGTGAACCGGTCTCTTT	0	-1.50502	-1.11015	-1.99202	23	ssc-miR-128	hsa-miR-128	mmu-miR-128
ssc-miR-133a	TTGGTCCCCTTCAACCAGCTG	0	-2.2194	-4.05939	-3.20803	25	ssc-miR-133a-3p	hsa-miR-133a	mmu-miR-133a
miR-133a-3p-1466	TTGGTCCCCTTCAACCAGCTGT	0	-2.08956	-3.93036	-3.14692	25	ssc-miR-133a-3p	hsa-miR-133a	mmu-miR-133a
ssc-miR-133b	TTTGGTCCCCTTCAACCAGCTAT	0	-2.52203	-4.49893	-3.57028	25	ssc-miR-133b	hsa-miR-133b	mmu-miR-133b
ssc-miR-139-5p	TCTACAGTGCACGTGTCTCCAG	0	0.690614	1.97728	1.39686	2	ssc-miR-139-5p	hsa-miR-139-5p	mmu-miR-139-5p
miR-187-3p-54578	TCGTGTCTTGTGTTGCAGCCGG	0	0.921695	1.45596	1.50921	2	ssc-miR-187	hsa-miR-187	mmu-miR-187
ssc-miR-199a-3p	ACAGTAGTCTGCACATTGGTTA	0	-1.56442	-1.45784	-2.12092	23	ssc-miR-199a-3p	hsa-miR-199a-3p	mmu-miR-199a-3p
miR-199a-3p-56318	ACAGTAGTCTGCACATTGGTTAGA	0	-1.38849	-1.39423	-1.97471	23	ssc-miR-199a-3p	hsa-miR-199a-3p	mmu-miR-199b
PN-200c-3p-193	TAATACTGCCGGGTAATGATGGA	0	0.63991	1.91073	2.09976	2	new	hsa-miR-200c	mmu-miR-200c
PN-200b-3p-161	TAATACTGCCTGGTAATGATGA	0	1.76258	3.10905	2.91141	2	new	hsa-miR-200b	mmu-miR-200b
ssc-miR-206	TGGAATGTAAGGAAGTGTGTGA	0	-3.75039	-5.04846	-6.24932	25	ssc-miR-206	hsa-miR-206	mmu-miR-206
ssc-miR-214	ACAGCAGGCACAGACAGGCAG	0	-0.72451	-0.974295	-2.13899	23	ssc-miR-214	hsa-miR-214	mmu-miR-214
miR-214-3p-314	ACAGCAGGCACAGACAGGCAGT	0	-0.884083	-1.02442	-2.30017	23	ssc-miR-214	hsa-miR-214	mmu-miR-214
ssc-miR-299	ATGGTTTACCGTCCCACATAC	0	-0.869365	-0.983014	-1.95997	23	ssc-miR-299	hsa-miR-299-5p	mmu-miR-299*
PN-299-5p-13746	TGGTTTACCGTCCCACATACAT	0	-0.837108	-1.08262	-1.89217	23	ssc-miR-299	hsa-miR-299-5p	mmu-miR-299*
PN-300-3p-13997	TATACAAGGACAAGCTCTCT	0	-0.712551	-0.772927	-2.04448	23	new	hsa-miR-381	mmu-miR-381
PN-323b-3p-1142	CCCAATACACGGTCGATCTCT	0	-1.02933	-1.41881	-1.74038	25	ssc-miR-323	hsa-miR-323b-3p	mmu-miR-323-3p
ssc-miR-323	GCACATTACACGGTCGACCTCT	0	-1.31366	-1.25633	-2.32913	23	ssc-miR-323	hsa-miR-323-3p	mmu-miR-323-3p
PN-329a-3p-1371	AACACACCTGGTTAACCTCTTT	0	-1.14444	-1.48695	-2.35962	23	new	hsa-miR-329	mmu-miR-329
PN-329a-3p-32943	AACACACCTGGTTAACCTTTT	0	-1.06016	-1.01584	-1.77719	23	new	hsa-miR-329	mmu-miR-329
PN-376c-3p-2496	AACATAGAGGAAATTCCACGT	0	-1.49804	-1.30294	-2.55336	23	ssc-miR-376a	hsa-miR-376c	mmu-miR-376c
PN-379-3p-17668	TATGTAACACGGTCCACTAACT	0	-0.964714	-0.567136	-1.53815	23	new	hsa-miR-379*	mmu-miR-411*
PN-379-5p-1421	TGGTAGACTGTGGAACGTAGG	0	-0.932908	-0.676292	-2.18443	23	new	hsa-miR-379	mmu-miR-379
PN-380-3p-267	TATGTAATATGGTCCACGTCT	0	-2.51319	-1.6529	-3.14049	23	new	hsa-miR-380	mmu-miR-380-3p
PN-382-5p-139	GAAGTTGTTCGTGGTGGATTCG	0	-1.09259	-1.16651	-2.38422	23	ssc-miR-382	hsa-miR-382	mmu-miR-382
PN-409-5p-873	AGGTTACCCGAGCAACTTTGCAT	0	-0.899105	-1.06727	-1.84744	23	new	hsa-miR-409-5p	mmu-miR-409-5p
PN-409-3p-335	GAATGTTGCTCGGTGAACCCCT	0	-1.28567	-0.991391	-2.5238	23	new	hsa-miR-409-3p	mmu-miR-409-3p
PN-409-3p-5527	GAATGTTGCTCGGTGAACCCCTA	0	-1.39166	-0.959861	-2.43005	23	new	hsa-miR-409-3p	mmu-miR-409-3p
PN-411-3p-3887	TATGTAACACGGTCCACTAAC	0	-1.09537	-0.774405	-1.91906	23	ssc-miR-411	hsa-miR-411*	mmu-miR-411*
miR-429-3p-734	TAATACTGTCTGGTAATGCCGT	0	1.08045	2.33301	1.96603	2	ssc-miR-429	hsa-miR-429	mmu-miR-429
PN-429-3p-6578	TAATACTGTCTGGTAATGCCGTT	0	0.569794	2.13087	1.80255	2	ssc-miR-429	hsa-miR-429	mmu-miR-429
miR-431-5p-35690	TGTCTTGCAGGCCGTCATGCA	0	-0.919705	-2.04649	-2.01661	25	new	hsa-miR-431	mmu-miR-431
ssc-miR-432	TCTTGGAGTAGGTCATTGGGT	0	-1.31527	-1.56571	-3.09871	23	ssc-miR-432-5p	hsa-miR-432	mmu-miR-432
miR-432-5p-807	TCTTGGAGTAGGTCATTGGGTG	0	-1.27138	-1.44759	-2.95262	23	ssc-miR-432-5p	hsa-miR-432	mmu-miR-432
ssc-miR-450c	TTTTGCGATGTGTTCCTAATAC	0	-1.90344	-3.40291	-3.66594	25	ssc-miR-450c-5p	hsa-miR-450a	mmu-miR-450a
ssc-miR-455	GCAGTCCATGGGCATATACAC	0	-0.880001	-1.11865	-1.38126	25	ssc-miR-455	hsa-miR-455-3p	mmu-miR-455
PN-485-3p-375	GTCATACACGGCTCTCCTCTCT	0	-1.05125	-1.18062	-2.41516	23	new	hsa-miR-485-3p	mmu-miR-485*
PN-487b-3p-443	AATCGTACAGGGTCATCCACTT	0	-1.2447	-1.60149	-2.61005	23	new	hsa-miR-487b	mmu-miR-487b
PN-495-3p-530	AAACAAACATGGTGCACTTCTT	0	-1.34279	-1.68222	-2.99676	23	new	hsa-miR-495	mmu-miR-495
PN-539-5p-31092	GGAGAAATTATCCTTGGTGTGT	0	-1.21839	-1.23389	-2.03195	23	new	hsa-miR-539	mmu-miR-539-5p
PN-660-5p-1115	TACCCATTGCATATCGGAGTTG	0	-0.760367	-1.18957	-1.09279	25	new	hsa-miR-660	-
